# Supplementary material for: Defective lytic transglycosylase disrupts cell morphogenesis by hindering cell wall de-O-acetylation in Neisseria meningitidis
Source: eLife. 2020 Feb 5;9:e51247. doi: 10.7554/eLife.51247 (PMC7083599; doi:10.7554/eLife.51247)
Supplement: Figure 2—source data 1. [file elife-51247-fig2-data1.xlsx]

## Sheet: Figure 2a
TIme (h)	Wild-type			ΔltgA			ΔltgAltgA			ΔltgAltgAΔ30
0	45000000	45000000	45000000	45000000	45000000	45000000	45000000	45000000	45000000	45000000	45000000	45000000
1	71100000	73800000	90000000	63900000	73800000	67500000	57600000	67500000	62100000	63000000	71100000	72900000
2	135000000	132000000	13700000	102600000	107100000	100800000	80100000	82800000	79200000	84600000	90900000	85500000
3	308700000	343800000	283500000	209700000	227700000	216900000	114300000	117000000	118800000	106200000	101700000	112500000
4	708300000	720900000	719100000	442800000	710100000	742500000	153000000	154800000	163800000	106200000	109800000	162000000
5	1616000000	1648800000	1553400000	1116000000	1606500000	1656000000	271800000	271800000	283500000	124200000	203400000	154800000
6	2045000000	1899000000	2181000000	2080000000	1845000000	2570000000	490500000	606600000	488700000	264600000	187200000	244800000
12	4142000000	2601000000	5205000000	3142000000	4475000000	3809000000	964800000	1062000000	1548000000	477000000	697500000	523800000
24	4259000000	4520000000	5493000000	5268000000	5322000000	4403000000	1638000000	1242000000	1728000000	610200000	774000000	631350000
Compare each cell mean with the other cell mean in that row
Number of families	1
Number of comparisons per family	9
Alpha	0.05
Bonferroni's multiple comparisons test	Mean Diff,	95,00% CI of diff,	Significant?	Summary
LtgAΔLtgA - LtgAΔ30, ΔLtgA
Row 1	0	-306428646 to 306428646	No	ns
Row 2	-6600000	-313028646 to 299828646	No	ns
Row 3	-6300000	-312728646 to 300128646	No	ns
Row 4	9900000	-296528646 to 316328646	No	ns
Row 5	31200000	-275228646 to 337628646	No	ns
Row 6	114900000	-191528646 to 421328646	No	ns
Row 7	296400000	-10028646 to 602828646	No	ns
Row 8	625500000	319071354 to 931928646	Yes	****
Row 9	864150000	557721354 to 1170578646	Yes	****
Test details	Mean 1	Mean 2	Mean Diff,	SE of diff,	N1	N2	t	DF
LtgAΔLtgA - LtgAΔ30, ΔLtgA
Row 1	45000000	45000000	0	97322672	3	3	0	18
Row 2	62400000	69000000	-6600000	97322672	3	3	0.06782	18
Row 3	80700000	87000000	-6300000	97322672	3	3	0.06473	18
Row 4	116700000	106800000	9900000	97322672	3	3	0.1017	18
Row 5	157200000	126000000	31200000	97322672	3	3	0.3206	18
Row 6	275700000	160800000	114900000	97322672	3	3	1.181	18
Row 7	528600000	232200000	296400000	97322672	3	3	3.046	18
Row 8	1191600000	566100000	625500000	97322672	3	3	6.427	18
Row 9	1536000000	671850000	864150000	97322672	3	3	8.879	18
