# Supplementary material for: Defective lytic transglycosylase disrupts cell morphogenesis by hindering cell wall de-O-acetylation in Neisseria meningitidis
Source: eLife. 2020 Feb 5;9:e51247. doi: 10.7554/eLife.51247 (PMC7083599; doi:10.7554/eLife.51247)
Supplement: Figure 2—source data 2. [file elife-51247-fig2-data2.xlsx]

## Sheet: Figure 2c
Time post-chase (h)	WT		LtgAΔLtgA		LtgAΔ30, ΔLtgA		ΔLtgA
0	1	1	6.02	5.32	5.2	4.93	0	0
3	1.34	1.68	5.9	5.67	4.06	5.99	0	0
6	1.28	1.54	5.42	5.57	3.84	5.11	0	0
9	1.53	1.52	6.04	5.66	5.36	5.46	0	0
