# Supplementary material for: Defective lytic transglycosylase disrupts cell morphogenesis by hindering cell wall de-O-acetylation in Neisseria meningitidis
Source: eLife. 2020 Feb 5;9:e51247. doi: 10.7554/eLife.51247 (PMC7083599; doi:10.7554/eLife.51247)
Supplement: Figure 4—source data 2. [file elife-51247-fig4-data2.xlsx]

## Sheet: Step1-Aligned peaks
	WT1				WT3				WT5				WT7				Loop30-2				Loop30-4				Loop30-6				Loop30-8
	Peak#	R.Time	Area
	1	5.616	22152513
	2	6.808	9206727		Peak#	R.Time	Area		Peak#	R.Time	Area		Peak#	R.Time	Area		Peak#	R.Time	Area		Peak#	R.Time	Area		Peak#	R.Time	Area		Peak#	R.Time	Area
	3	7.130	6730325		1	5.634	11430162		1	5.620	10687024		1	5.625	13831093		1	5.635	15089578		1	5.633	12944067		1	5.617	12013740		1	5.623	11245101
	4	9.377	5002165		2	6.791	9843819		2	6.785	9543920		2	6.871	10660386		2	6.826	10408591		2	6.820	9540059		2	6.805	9126989		2	6.799	10020796
	5	10.890	5096887		3	7.110	6025718		3	7.138	6522046		3	7.198	10479713		3	7.140	7683889		3	7.140	6374886		3	7.148	6323139		3	7.117	5771676
	6	23.992	1404593		4	9.523	4987470		4	9.489	5144165		4	9.533	6408994		4	9.448	4649671		4	9.500	5060566		4	9.450	5197890		4	9.476	4738699
	7	27.423	1170786		5	10.899	4560186		5	10.928	5224671		5	10.959	6072426		5	10.853	2706929		5	10.808	3172803		5	10.895	4077000		5	10.916	4585835
1	8	33.742	10745011		6	33.298	9541840		6	33.290	9643819		6	33.325	9164946		6	33.355	10125762		6	33.294	9572167		6	33.297	9703436		6	33.266	9035461
2	9	34.370	6324777		7	33.841	7164998		7	33.838	7547796		7	33.878	7188608		7	33.915	4513583		7	33.856	5989756		7	33.863	5905316		7	33.821	4985681
	10	36.923	896001														8	40.058	52092690		8	40.061	50613876		8	40.052	50032186		8	40.090	45975226
3	11	40.376	34111206		8	40.320	33352273		8	40.298	34037417		8	40.319	32828755
4	12	43.485	14809795		9	43.515	14868453		9	43.493	15026394		9	43.519	13476752		9	43.566	12849378		9	43.537	13126302		9	43.523	13032439		9	43.533	11110984
5	13	45.014	968302		10	44.961	1072626		10	44.947	1104916		10	44.967	764830						10	44.958	789932		10	44.963	938810		10	44.927	806467
6	14	45.691	2876532		11	45.660	3033287		11	45.644	2966323		11	45.670	2233142		10	45.681	1817301		11	45.656	1956618		11	45.663	1853131		11	45.627	1518293
7	15	49.012	1870045		12	49.198	1761273		12	49.132	1828321		12	49.130	1810478		11	49.158	1826533		12	49.131	2050825		12	49.091	2012975		12	49.029	1782516
8	16	49.573	1178113		13	49.693	1064695		13	49.651	1094745		13	49.675	987303
													14	50.510	4926308		12	50.399	43856369		13	50.348	47111442		13	50.325	47471512		13	50.346	40070732
9	17	50.609	18481073		14	50.708	20916386		14	50.669	20539837		15	50.759	10944344
	18	51.519	1214723
10	19	53.189	9258484		15	53.317	8790348		15	53.259	9041121		16	53.287	8848827		13	53.294	11463774		14	53.281	11194228		14	53.284	10968907		14	53.225	9763333
11	20	53.737	1866670		16	53.898	1984104		16	53.841	1924136		17	53.874	1505116		14	53.951	1307742		15	53.920	1444915		15	53.907	1497949		15	53.851	1236635
12	21	54.789	32717538		17	54.945	31046214		17	54.872	31836736		18	54.893	31656758		15	54.890	36937749		16	54.882	35379020		16	54.885	34797146		16	54.850	32697108
13	22	56.311	19283465		18	56.458	18972504		18	56.382	19370194		19	56.411	17856663		16	56.498	14908037		17	56.469	14771702		17	56.460	14726664		17	56.429	13239707
	23	56.864	1209508		19	57.022	1156390		19	56.946	1134338		20	56.963	1219559
	24	57.212	920429		20	57.647	1868731		20	57.307	869524		21	57.308	839540		17	57.031	1424305		18	57.009	1393979		18	56.999	1382443		18	56.947	1266205
	25	57.554	1132852		21	57.999	1018376		21	57.607	1111441		22	57.618	1032966		18	57.634	1576552		19	57.652	1664421		19	57.660	1031999		19	57.576	964288
	26	57.862	986368		22	58.550	875554		22	57.923	1024990		23	57.930	955027		19	57.988	898190		20	57.960	885541		20	57.942	890950		20	57.894	810348
	27	58.445	982872						23	58.476	921772		24	58.486	883645						21	58.516	766252		21	58.497	787214
14	28	59.126	3356267		23	59.245	3292532		24	59.167	3347715		25	59.178	3219882		20	59.220	3845330		22	59.190	3924585		22	59.163	3883730		21	59.126	3423240
																													22	59.879	2707157
15	29	60.164	7760637		24	60.279	7663352		25	60.208	7896397		26	60.227	7131586		21	60.244	8907478		23	60.216	9316412		23	60.189	9337261		23	60.160	5469161
16	30	61.220	18261171		25	61.286	17803584		26	61.224	18301514		27	61.226	18371235		22	61.291	18812743		24	61.279	17867537		24	61.254	17380889		24	61.231	17082147
																	23	61.563	42403390		25	61.540	43476071		25	61.511	43506591		25	61.511	39066095
17	31	61.597	18586327		26	61.695	19919079		27	61.627	20138418		28	61.663	18055348
	32	61.946	4540026
18	33	62.143	9558008		27	62.200	13625663		28	62.145	13934886		29	62.164	12671079
19	34	62.864	4120441		28	62.958	4377633		29	62.898	4299141		30	62.917	3686341		24	62.984	3542278		26	62.962	3724446		26	62.925	3720761		26	62.901	3170333
20	35	63.408	3920280		29	63.505	3890590		30	63.444	3935874		31	63.460	3596482		25	63.541	3356330		27	63.523	3442959		27	63.482	3452920		27	63.460	3038203
21	36	64.159	2454932		30	64.265	2529780		31	64.208	2626209		32	64.216	2352484		26	64.248	2737059		28	64.247	2867693		28	64.216	2885892		28	64.162	2438765
22	37	64.583	4523294		31	64.631	4849251		32	64.584	4746658		33	64.605	4568997		27	64.621	3434573		29	64.616	3431713		29	64.580	3473707		29	64.569	3053222
23	38	65.267	2614671		32	65.317	2063787		33	65.273	2187847		34	65.294	2290081		28	65.350	1368886
24	39	66.009	8489219		33	66.079	8473737		34	66.032	8675325		35	66.056	8212628		29	66.058	10570451		30	66.056	11851822		30	66.019	11385657		30	66.000	10733211
25	40	66.272	6910914		34	66.346	6499544		35	66.299	6723676		36	66.319	6493455		30	66.322	7870456		31	66.321	7522352		31	66.282	7517778		31	66.262	6948816
26	41	66.803	2523160		35	66.867	2531861		36	66.825	2661821		37	66.855	2279733		31	66.877	2569138		32	66.861	2795717		32	66.816	2793578		32	66.797	2368954
27													38	67.115	1232179
28	42	67.298	4511806		36	67.413	4885403		37	67.367	4994476		39	67.377	3350759		32	67.338	5377988		33	67.329	5566193		33	67.293	5536008		33	67.265	4841171
29	43	67.689	7788486		37	67.765	8512346		38	67.720	8482706		40	67.769	6777133		33	67.700	11282847		34	67.665	12352137		34	67.621	12416622		34	67.626	10750968
30	44	68.074	9470145		38	68.135	11213390		39	68.091	10668464		41	68.159	7906436		34	68.073	16380139		35	68.025	18070733		35	67.974	18179492		35	67.997	14845670
31	45	68.796	5319208		39	68.898	5163234		40	68.848	5551815		42	68.850	5368424		35	68.920	4770798		36	68.929	4848256		36	68.885	4813352		36	68.832	4426775
32	46	69.067	11770990		40	69.158	11981508		41	69.110	11839352		43	69.128	10727592		36	69.191	9902762		37	69.194	9836701		37	69.149	9780506		37	69.113	8664265
33	47	70.856	12287122		41	70.903	12945289		42	70.867	13003520		44	70.905	11102649		37	70.903	15336888		38	70.895	16289078		38	70.841	16103276		38	70.825	14295573
34	48	71.270	4080501		42	71.318	4241910		43	71.284	4348465		45	71.320	3759993		38	71.319	4590177		39	71.312	4877996		39	71.257	5104526		39	71.235	4251455
35	49	71.647	2415967		43	71.703	2432337		44	71.669	2503840		46	71.689	2351763		39	71.731	1782871		40	71.730	1688904		40	71.685	1525797		40	71.630	1492025
	50	72.043	7554549		44	72.103	7232141		45	72.070	7374475		47	72.086	7062213		40	72.146	6370325		41	72.157	6240537		41	72.111	6102655		41	72.058	5777060
																	41	72.761	904348		42	72.765	1048943		42	72.713	1050755		42	72.680	897226
36	51	73.053	3736428		45	73.096	3757034		46	73.063	3794812		48	73.098	3713666		42	73.048	1430645		43	73.040	1557519		43	72.986	1551352		43	72.909	1274744
37	52	73.378	2295119		46	73.426	2493151		47	73.390	2433970		49	73.435	2122586		43	73.420	2241267		44	73.418	2444266		44	73.371	2455458		44	73.317	2076098
38	53	73.699	1765073		47	73.794	1976231		48	73.747	1848921		50	73.768	1470180		44	73.806	1928327		45	73.803	2045332		45	73.758	2004732		45	73.698	1607786
	54	74.872	7647226		48	74.944	10573281		49	74.905	8451934		51	74.945	8063677		45	74.940	9824717		46	74.931	10840488		46	74.885	10960932		46	74.843	9223981
39	55	75.164	1627824						50	75.173	1952878						46	75.227	2686999		47	75.218	3376092		47	75.172	3454002		47	75.152	2725091
40	56	75.553	3378469		49	75.598	4131963		51	75.567	4087302		52	75.609	2835976		47	75.609	4971145		48	75.597	5805733		48	75.549	6025788		48	75.525	4840164
41	57	75.856	2939088		50	75.909	2964514		52	75.875	3164158		53	75.894	2864068		48	75.911	3241138		49	75.918	3649680		49	75.878	3407039		49	75.827	3017817
42	58	76.258	3428108		51	76.313	3591215		53	76.286	3439150		54	76.299	3007787		49	76.326	3361316		50	76.338	3428252		50	76.298	3368975		50	76.241	2991888
	59	76.603	2171197		52	76.660	2251482		54	76.633	2259889		55	76.643	2025626		50	76.678	2961850		51	76.690	2061926		51	76.651	2069946		51	76.595	1857773
Raw peak area tables are generated automatically for each chromatogram

## Sheet: Step2-Aligned-annotated
	WT1				WT3				WT5				WT7				Loop30-2				Loop30-4				Loop30-6				Loop30-8
	Peak#	R.Time	Area		Peak#	R.Time	Area		Peak#	R.Time	Area		Peak#	R.Time	Area		Peak#	R.Time	Area		Peak#	R.Time	Area		Peak#	R.Time	Area		Peak#	R.Time	Area
1	8	33.742	10745011		6	33.298	9541840		6	33.290	9643819		6	33.325	9164946		6	33.355	10125762		6	33.294	9572167		6	33.297	9703436		6	33.266	9035461
2	9	34.370	6324777		7	33.841	7164998		7	33.838	7547796		7	33.878	7188608		7	33.915	4513583		7	33.856	5989756		7	33.863	5905316		7	33.821	4985681
	10	36.923	896001
3	11	40.376	34111206		8	40.320	33352273		8	40.298	34037417		8	40.319	32828755		8	40.058	52092690		8	40.061	50613876		8	40.052	50032186		8	40.090	45975226
4	12	43.485	14809795		9	43.515	14868453		9	43.493	15026394		9	43.519	13476752		9	43.566	12849378		9	43.537	13126302		9	43.523	13032439		9	43.533	11110984
5	13	45.014	968302		10	44.961	1072626		10	44.947	1104916		10	44.967	764830						10	44.958	789932		10	44.963	938810		10	44.927	806467
6	14	45.691	2876532		11	45.660	3033287		11	45.644	2966323		11	45.670	2233142		10	45.681	1817301		11	45.656	1956618		11	45.663	1853131		11	45.627	1518293
7	15	49.012	1870045		12	49.198	1761273		12	49.132	1828321		12	49.130	1810478		11	49.158	1826533		12	49.131	2050825		12	49.091	2012975		12	49.029	1782516
8	16	49.573	1178113		13	49.693	1064695		13	49.651	1094745		13	49.675	987303
													14	50.510	4926308		12	50.399	43856369		13	50.348	47111442		13	50.325	47471512		13	50.346	40070732
9	17	50.609	18481073		14	50.708	20916386		14	50.669	20539837		15	50.759	10944344
	18	51.519	1214723
10	19	53.189	9258484		15	53.317	8790348		15	53.259	9041121		16	53.287	8848827		13	53.294	11463774		14	53.281	11194228		14	53.284	10968907		14	53.225	9763333
11	20	53.737	1866670		16	53.898	1984104		16	53.841	1924136		17	53.874	1505116		14	53.951	1307742		15	53.920	1444915		15	53.907	1497949		15	53.851	1236635
12	21	54.789	32717538		17	54.945	31046214		17	54.872	31836736		18	54.893	31656758		15	54.890	36937749		16	54.882	35379020		16	54.885	34797146		16	54.850	32697108
13	22	56.311	19283465		18	56.458	18972504		18	56.382	19370194		19	56.411	17856663		16	56.498	14908037		17	56.469	14771702		17	56.460	14726664		17	56.429	13239707
	23	56.864	1209508		19	57.022	1156390		19	56.946	1134338		20	56.963	1219559
	24	57.212	920429		20	57.647	1868731		20	57.307	869524		21	57.308	839540		17	57.031	1424305		18	57.009	1393979		18	56.999	1382443		18	56.947	1266205
	25	57.554	1132852		21	57.999	1018376		21	57.607	1111441		22	57.618	1032966		18	57.634	1576552		19	57.652	1664421		19	57.660	1031999		19	57.576	964288
	26	57.862	986368		22	58.550	875554		22	57.923	1024990		23	57.930	955027		19	57.988	898190		20	57.960	885541		20	57.942	890950		20	57.894	810348
	27	58.445	982872						23	58.476	921772		24	58.486	883645						21	58.516	766252		21	58.497	787214
14	28	59.126	3356267		23	59.245	3292532		24	59.167	3347715		25	59.178	3219882		20	59.220	3845330		22	59.190	3924585		22	59.163	3883730		21	59.126	3423240
																													22	59.879	2707157
15	29	60.164	7760637		24	60.279	7663352		25	60.208	7896397		26	60.227	7131586		21	60.244	8907478		23	60.216	9316412		23	60.189	9337261		23	60.160	5469161
16	30	61.220	18261171		25	61.286	17803584		26	61.224	18301514		27	61.226	18371235		22	61.291	18812743		24	61.279	17867537		24	61.254	17380889		24	61.231	17082147
																	23	61.563	42403390		25	61.540	43476071		25	61.511	43506591		25	61.511	39066095
17	31	61.597	18586327		26	61.695	19919079		27	61.627	20138418		28	61.663	18055348
	32	61.946	4540026
18	33	62.143	9558008		27	62.200	13625663		28	62.145	13934886		29	62.164	12671079
19	34	62.864	4120441		28	62.958	4377633		29	62.898	4299141		30	62.917	3686341		24	62.984	3542278		26	62.962	3724446		26	62.925	3720761		26	62.901	3170333
20	35	63.408	3920280		29	63.505	3890590		30	63.444	3935874		31	63.460	3596482		25	63.541	3356330		27	63.523	3442959		27	63.482	3452920		27	63.460	3038203
21	36	64.159	2454932		30	64.265	2529780		31	64.208	2626209		32	64.216	2352484		26	64.248	2737059		28	64.247	2867693		28	64.216	2885892		28	64.162	2438765
22	37	64.583	4523294		31	64.631	4849251		32	64.584	4746658		33	64.605	4568997		27	64.621	3434573		29	64.616	3431713		29	64.580	3473707		29	64.569	3053222
23	38	65.267	2614671		32	65.317	2063787		33	65.273	2187847		34	65.294	2290081		28	65.350	1368886
24	39	66.009	8489219		33	66.079	8473737		34	66.032	8675325		35	66.056	8212628		29	66.058	10570451		30	66.056	11851822		30	66.019	11385657		30	66.000	10733211
25	40	66.272	6910914		34	66.346	6499544		35	66.299	6723676		36	66.319	6493455		30	66.322	7870456		31	66.321	7522352		31	66.282	7517778		31	66.262	6948816
26	41	66.803	2523160		35	66.867	2531861		36	66.825	2661821		37	66.855	2279733		31	66.877	2569138		32	66.861	2795717		32	66.816	2793578		32	66.797	2368954
27													38	67.115	1232179
28	42	67.298	4511806		36	67.413	4885403		37	67.367	4994476		39	67.377	3350759		32	67.338	5377988		33	67.329	5566193		33	67.293	5536008		33	67.265	4841171
29	43	67.689	7788486		37	67.765	8512346		38	67.720	8482706		40	67.769	6777133		33	67.700	11282847		34	67.665	12352137		34	67.621	12416622		34	67.626	10750968
30	44	68.074	9470145		38	68.135	11213390		39	68.091	10668464		41	68.159	7906436		34	68.073	16380139		35	68.025	18070733		35	67.974	18179492		35	67.997	14845670
31	45	68.796	5319208		39	68.898	5163234		40	68.848	5551815		42	68.850	5368424		35	68.920	4770798		36	68.929	4848256		36	68.885	4813352		36	68.832	4426775
32	46	69.067	11770990		40	69.158	11981508		41	69.110	11839352		43	69.128	10727592		36	69.191	9902762		37	69.194	9836701		37	69.149	9780506		37	69.113	8664265
33	47	70.856	12287122		41	70.903	12945289		42	70.867	13003520		44	70.905	11102649		37	70.903	15336888		38	70.895	16289078		38	70.841	16103276		38	70.825	14295573
34	48	71.270	4080501		42	71.318	4241910		43	71.284	4348465		45	71.320	3759993		38	71.319	4590177		39	71.312	4877996		39	71.257	5104526		39	71.235	4251455
35	49	71.647	2415967		43	71.703	2432337		44	71.669	2503840		46	71.689	2351763		39	71.731	1782871		40	71.730	1688904		40	71.685	1525797		40	71.630	1492025
	50	72.043	7554549		44	72.103	7232141		45	72.070	7374475		47	72.086	7062213		40	72.146	6370325		41	72.157	6240537		41	72.111	6102655		41	72.058	5777060
																	41	72.761	904348		42	72.765	1048943		42	72.713	1050755		42	72.680	897226
36	51	73.053	3736428		45	73.096	3757034		46	73.063	3794812		48	73.098	3713666		42	73.048	1430645		43	73.040	1557519		43	72.986	1551352		43	72.909	1274744
37	52	73.378	2295119		46	73.426	2493151		47	73.390	2433970		49	73.435	2122586		43	73.420	2241267		44	73.418	2444266		44	73.371	2455458		44	73.317	2076098
38	53	73.699	1765073		47	73.794	1976231		48	73.747	1848921		50	73.768	1470180		44	73.806	1928327		45	73.803	2045332		45	73.758	2004732		45	73.698	1607786
	54	74.872	7647226		48	74.944	10573281		49	74.905	8451934		51	74.945	8063677		45	74.940	9824717		46	74.931	10840488		46	74.885	10960932		46	74.843	9223981
39	55	75.164	1627824						50	75.173	1952878						46	75.227	2686999		47	75.218	3376092		47	75.172	3454002		47	75.152	2725091
40	56	75.553	3378469		49	75.598	4131963		51	75.567	4087302		52	75.609	2835976		47	75.609	4971145		48	75.597	5805733		48	75.549	6025788		48	75.525	4840164
41	57	75.856	2939088		50	75.909	2964514		52	75.875	3164158		53	75.894	2864068		48	75.911	3241138		49	75.918	3649680		49	75.878	3407039		49	75.827	3017817
42	58	76.258	3428108		51	76.313	3591215		53	76.286	3439150		54	76.299	3007787		49	76.326	3361316		50	76.338	3428252		50	76.298	3368975		50	76.241	2991888
	59	76.603	2171197		52	76.660	2251482		54	76.633	2259889		55	76.643	2025626		50	76.678	2961850		51	76.690	2061926		51	76.651	2069946		51	76.595	1857773
The peak area tables are aligned. Minor peaks may not have been identified automatically by the software across all samples. Table alignment aids manual identification of such peaks.

## Sheet: Step3-Manual-correction
	WT1				WT3				WT5				WT7				Loop30-2				Loop30-4				Loop30-6				Loop30-8
	Peak#	R.Time	Area		Peak#	R.Time	Area		Peak#	R.Time	Area		Peak#	R.Time	Area		Peak#	R.Time	Area		Peak#	R.Time	Area		Peak#	R.Time	Area		Peak#	R.Time	Area
1	8	33.742	10745011		6	33.298	9541840		6	33.290	9643819		6	33.325	9164946		6	33.355	10125762		6	33.294	9572167		6	33.297	9703436		6	33.266	9035461
2	9	34.370	6324777		7	33.841	7164998		7	33.838	7547796		7	33.878	7188608		7	33.915	4513583		7	33.856	5989756		7	33.863	5905316		7	33.821	4985681
3	11	40.376	34111206		8	40.320	33352273		8	40.298	34037417		8	40.319	32828755		8	40.058	52092690		8	40.061	50613876		8	40.052	50032186		8	40.090	45975226
4	12	43.485	14809795		9	43.515	14868453		9	43.493	15026394		9	43.519	13476752		9	43.566	12849378		9	43.537	13126302		9	43.523	13032439		9	43.533	11110984
5	13	45.014	968302		10	44.961	1072626		10	44.947	1104916		10	44.967	764830			44.980	616235		10	44.958	789932		10	44.963	938810		10	44.927	806467
6	14	45.691	2876532		11	45.660	3033287		11	45.644	2966323		11	45.670	2233142		10	45.681	1805451		11	45.656	1956618		11	45.663	1853131		11	45.627	1518293
7	15	49.012	1870045		12	49.198	1761273		12	49.132	1828321		12	49.130	1810478		11	49.158	1817622		12	49.131	2050825		12	49.091	2012975		12	49.029	1782516
8	16	49.573	1178113		13	49.693	1064695		13	49.651	1094745		13	49.675	987303			49.750	2166025			49.783	3215759			49.783	3599274			49.700	2179284
		50.370	5572754			50.478	5811990			50.439	6156109		14	50.510	4926308			50.220	1163354			50.150	9216001			50.133	9176470			50.167	9539154
9	17	50.609	12908319		14	50.708	15104395		14	50.669	14383728		15	50.759	10944344		12	50.399	31605142		13	50.348	34094436		13	50.325	34142637		13	50.346	27855130
10	19	53.189	9258484		15	53.317	8790348		15	53.259	9041121		16	53.287	8848827		13	53.294	11463774		14	53.281	11194228		14	53.284	10968907		14	53.225	9763333
11	20	53.737	1866670		16	53.898	1984104		16	53.841	1924136		17	53.874	1505116		14	53.951	1307742		15	53.920	1444915		15	53.907	1497949		15	53.851	1236635
12	21	54.789	32717538		17	54.945	31046214		17	54.872	31836736		18	54.893	31656758		15	54.890	36937749		16	54.882	35379020		16	54.885	34797146		16	54.850	32697108
13	22	56.311	19283465		18	56.458	18972504		18	56.382	19370194		19	56.411	17856663		16	56.498	14908037		17	56.469	14771702		17	56.460	14726664		17	56.429	13239707
	23	56.864	1209508		19	57.022	1156390		19	56.946	1134338		20	56.963	1219559
	24	57.212	920429		20	57.647	1868731		20	57.307	869524		21	57.308	839540		17	57.031	1424305		18	57.009	1393979		18	56.999	1382443		18	56.947	1266205
	25	57.554	1132852		21	57.999	1018376		21	57.607	1111441		22	57.618	1032966		18	57.634	1576552		19	57.652	1664421		19	57.660	1031999		19	57.576	964288
	26	57.862	986368		22	58.550	875554		22	57.923	1024990		23	57.930	955027		19	57.988	898190		20	57.960	885541		20	57.942	890950		20	57.894	810348
	27	58.445	982872						23	58.476	921772		24	58.486	883645						21	58.516	766252		21	58.497	787214
14	28	59.126	3356267		23	59.245	3292532		24	59.167	3347715		25	59.178	3219882		20	59.220	3845330		22	59.190	3924585		22	59.163	3883730		21	59.126	3423240
15	29	60.164	7760637		24	60.279	7663352		25	60.208	7896397		26	60.227	7131586		21	60.244	8907478		23	60.216	9316412		23	60.189	9337261		23	60.160	8176318
16	30	61.220	18261171		25	61.286	17803584		26	61.224	18301514		27	61.226	18371235		22	61.291	18812743		24	61.279	17867537		24	61.254	17380889		24	61.231	17082147
17	31	61.597	23126353		26	61.695	19919079		27	61.627	20138418		28	61.663	18055348		23	61.563	33637608		25	61.540	33930895		25	61.511	34882267		25	61.511	32022368
18	33	62.143	9558008		27	62.200	13625663		28	62.145	13934886		29	62.164	12671079			62.167	8755510			62.133	9545176			62.113	8624323			62.117	7043727
19	34	62.864	4120441		28	62.958	4377633		29	62.898	4299141		30	62.917	3686341		24	62.984	3542278		26	62.962	3724446		26	62.925	3720761		26	62.901	3170333
20	35	63.408	3920280		29	63.505	3890590		30	63.444	3935874		31	63.460	3596482		25	63.541	3356330		27	63.523	3442959		27	63.482	3452920		27	63.460	3038203
21	36	64.159	2454932		30	64.265	2529780		31	64.208	2626209		32	64.216	2352484		26	64.248	2737059		28	64.247	2867693		28	64.216	2885892		28	64.162	2438765
22	37	64.583	4523294		31	64.631	4849251		32	64.584	4746658		33	64.605	4568997		27	64.621	3434573		29	64.616	3431713		29	64.580	3473707		29	64.569	3053222
23	38	65.267	2614671		32	65.317	2063787		33	65.273	2187847		34	65.294	2290081		28	65.350	1368886			65.362	1453369			65.400	1524703			65.350	1339216
24	39	66.009	8489219		33	66.079	8473737		34	66.032	8675325		35	66.056	8212628		29	66.058	10570451		30	66.056	10397953		30	66.019	9860955		30	66.000	9393995
25	40	66.272	6910914		34	66.346	6499544		35	66.299	6723676		36	66.319	6493455		30	66.322	7870456		31	66.321	7522352		31	66.282	7517778		31	66.262	6948816
26	41	66.803	2523160		35	66.867	2531861		36	66.825	2661821		37	66.855	2279733		31	66.877	2569138		32	66.861	2795717		32	66.816	2793578		32	66.797	2368954
28	42	67.298	4511806		36	67.413	4885403		37	67.367	4994476		39	67.377	4582938		32	67.338	5377988		33	67.329	5566193		33	67.293	5536008		33	67.265	4841171
29	43	67.689	7788486		37	67.765	8512346		38	67.720	8482706		40	67.769	6777133		33	67.700	11282847		34	67.665	12352137		34	67.621	12416622		34	67.626	10750968
30	44	68.074	9470145		38	68.135	11213390		39	68.091	10668464		41	68.159	7906436		34	68.073	16380139		35	68.025	18070733		35	67.974	18179492		35	67.997	14845670
31	45	68.796	5319208		39	68.898	5163234		40	68.848	5551815		42	68.850	5368424		35	68.920	4770798		36	68.929	4848256		36	68.885	4813352		36	68.832	4426775
32	46	69.067	11770990		40	69.158	11981508		41	69.110	11839352		43	69.128	10727592		36	69.191	9902762		37	69.194	9836701		37	69.149	9780506		37	69.113	8664265
33	47	70.856	12287122		41	70.903	12945289		42	70.867	13003520		44	70.905	11102649		37	70.903	15336888		38	70.895	16289078		38	70.841	16103276		38	70.825	14295573
34	48	71.270	4080501		42	71.318	4241910		43	71.284	4348465		45	71.320	3759993		38	71.319	4590177		39	71.312	4877996		39	71.257	5104526		39	71.235	4251455
35	49	71.647	2415967		43	71.703	2432337		44	71.669	2503840		46	71.689	2351763		39	71.731	1782871		40	71.730	1688904		40	71.685	1525797		40	71.630	1492025
	50	72.043	7554549		44	72.103	7232141		45	72.070	7374475		47	72.086	7062213		40	72.146	6370325		41	72.157	6240537		41	72.111	6102655		41	72.058	5777060
36	51	73.053	3736428		45	73.096	3757034		46	73.063	3794812		48	73.098	3713666		42	73.048	2334993		43	73.040	2606462		43	72.986	2602107		43	72.909	2171970
37	52	73.378	2295119		46	73.426	2493151		47	73.390	2433970		49	73.435	2122586		43	73.420	2241267		44	73.418	2444266		44	73.371	2455458		44	73.317	2076098
38	53	73.699	1765073		47	73.794	1976231		48	73.747	1848921		50	73.768	1470180		44	73.806	1928327		45	73.803	2045332		45	73.758	2004732		45	73.698	1607786
	54	74.872	7647226		48	74.944	8545126		49	74.905	8451934		51	74.945	6769599		45	74.940	9824717		46	74.931	10840488		46	74.885	10960932		46	74.843	9223981
39	55	75.164	1627824			75.203	2028155		50	75.173	1952878			75.210	1294077		46	75.227	2686999		47	75.218	3376092		47	75.172	3454002		47	75.152	2725091
40	56	75.553	3378469		49	75.598	4131963		51	75.567	4087302		52	75.609	2835976		47	75.609	4971145		48	75.597	5805733		48	75.549	6025788		48	75.525	4840164
41	57	75.856	2939088		50	75.909	2964514		52	75.875	3164158		53	75.894	2864068		48	75.911	3241138		49	75.918	3649680		49	75.878	3407039		49	75.827	3017817
42	58	76.258	3428108		51	76.313	3591215		53	76.286	3439150		54	76.299	3007787		49	76.326	3361316		50	76.338	3428252		50	76.298	3368975		50	76.241	2991888
	59	76.603	2171197		52	76.660	2251482		54	76.633	2259889		55	76.643	2025626		50	76.678	2961850		51	76.690	2061926		51	76.651	2069946		51	76.595	1857773
Minor peaks areas that were not identified automatically by the software, but which are required for comparison between chromatograms, are isolated manually and included in the relevant table.

## Sheet: Calculations
Peak areas aligned		WT1	WT3	WT5	WT7	Helix30-2	Helix30-4	Helix30-6	Helix30-8
		Area	Area	Area	Area	Area	Area	Area	Area
		10745011	9541840	9643819	9164946	10125762	9572167	9703436	9035461
		6324777	7164998	7547796	7188608	4513583	5989756	5905316	4985681
		34111206	33352273	34037417	32828755	52092690	50613876	50032186	45975226
		14809795	14868453	15026394	13476752	12849378	13126302	13032439	11110984
		968302	1072626	1104916	764830	616235	789932	938810	806467
		2876532	3033287	2966323	2233142	1805451	1956618	1853131	1518293
		1870045	1761273	1828321	1810478	1817622	2050825	2012975	1782516
		1178113	1064695	1094745	987303	2166025	3215759	3599274	2179284
		5572754	5811990	6156109	4926308	1163354	9216001	9176470	9539154
		12908319	15104395	14383728	10944344	31605142	34094436	34142637	27855130
		9258484	8790348	9041121	8848827	11463774	11194228	10968907	9763333
		1866670	1984104	1924136	1505116	1307742	1444915	1497949	1236635
		32717538	31046214	31836736	31656758	36937749	35379020	34797146	32697108
		19283465	18972504	19370194	17856663	14908037	14771702	14726664	13239707
		3356267	3292532	3347715	3219882	3845330	3924585	3883730	3423240
		7760637	7663352	7896397	7131586	8907478	9316412	9337261	8176318
		18261171	17803584	18301514	18371235	18812743	17867537	17380889	17082147
		23126353	19919079	20138418	18055348	33637608	33930895	34882267	32022368
		9558008	13625663	13934886	12671079	8755510	9545176	8624323	7043727
		4120441	4377633	4299141	3686341	3542278	3724446	3720761	3170333
		3920280	3890590	3935874	3596482	3356330	3442959	3452920	3038203
		2454932	2529780	2626209	2352484	2737059	2867693	2885892	2438765
		4523294	4849251	4746658	4568997	3434573	3431713	3473707	3053222
		2614671	2063787	2187847	2290081	1368886	1453369	1524703	1339216
		8489219	8473737	8675325	8212628	10570451	10397953	9860955	9393995
		6910914	6499544	6723676	6493455	7870456	7522352	7517778	6948816
		2523160	2531861	2661821	2279733	2569138	2795717	2793578	2368954
		4511806	4885403	4994476	4582938	5377988	5566193	5536008	4841171
		7788486	8512346	8482706	6777133	11282847	12352137	12416622	10750968
		9470145	11213390	10668464	7906436	16380139	18070733	18179492	14845670
		5319208	5163234	5551815	5368424	4770798	4848256	4813352	4426775
		11770990	11981508	11839352	10727592	9902762	9836701	9780506	8664265
		12287122	12945289	13003520	11102649	15336888	16289078	16103276	14295573
		4080501	4241910	4348465	3759993	4590177	4877996	5104526	4251455
		2415967	2432337	2503840	2351763	1782871	1688904	1525797	1492025
		7554549	7232141	7374475	7062213	6370325	6240537	6102655	5777060
		3736428	3757034	3794812	3713666	2334993	2606462	2602107	2171970
		2295119	2493151	2433970	2122586	2241267	2444266	2455458	2076098
		1765073	1976231	1848921	1470180	1928327	2045332	2004732	1607786
		7647226	8545126	8451934	6769599	9824717	10840488	10960932	9223981
		1627824	2028155	1952878	1294077	2686999	3376092	3454002	2725091
		3378469	4131963	4087302	2835976	4971145	5805733	6025788	4840164
		2939088	2964514	3164158	2864068	3241138	3649680	3407039	3017817
		3428108	3591215	3439150	3007787	3361316	3428252	3368975	2991888
		2171197	2251482	2259889	2025626	2961850	2061926	2069946	1857773
Peak area corresponding to key muropeptides
		WT1	WT3	WT5	WT7	Helix30-2	Helix30-4	Helix30-6	Helix30-8
#		Area	Area	Area	Area	Area	Area	Area	Area
1		10745011	9541840	9643819	9164946	10125762	9572167	9703436	9035461
2	GM3	6324777	7164998	7547796	7188608	4513583	5989756	5905316	4985681
3	GM4	34111206	33352273	34037417	32828755	52092690	50613876	50032186	45975226
4	GM5	14809795	14868453	15026394	13476752	12849378	13126302	13032439	11110984
5		968302	1072626	1104916	764830	616235	789932	938810	806467
6	4-4	2876532	3033287	2966323	2233142	1805451	1956618	1853131	1518293
7		5572754	5811990	6156109	4926308	1163354	9216001	9176470	9539154
8	GM4*	12908319	15104395	14383728	10944344	31605142	34094436	34142637	27855130
9		9258484	8790348	9041121	8848827	11463774	11194228	10968907	9763333
10	GM4-4	32717538	31046214	31836736	31656758	36937749	35379020	34797146	32697108
11	GanhM3	19283465	18972504	19370194	17856663	14908037	14771702	14726664	13239707
12	GM4-GM4	7760637	7663352	7896397	7131586	8907478	9316412	9337261	8176318
13		18261171	17803584	18301514	18371235	18812743	17867537	17380889	17082147
14	GM4-GM5	23126353	19919079	20138418	18055348	33637608	33930895	34882267	32022368
15		9558008	13625663	13934886	12671079	8755510	9545176	8624323	7043727
16		8489219	8473737	8675325	8212628	10570451	10397953	9860955	9393995
17		6910914	6499544	6723676	6493455	7870456	7522352	7517778	6948816
18		4511806	4885403	4994476	4582938	5377988	5566193	5536008	4841171
19		7788486	8512346	8482706	6777133	11282847	12352137	12416622	10750968
20	GM4*-GM4*	9470145	11213390	10668464	7906436	16380139	18070733	18179492	14845670
21		5319208	5163234	5551815	5368424	4770798	4848256	4813352	4426775
22		11770990	11981508	11839352	10727592	9902762	9836701	9780506	8664265
23		12287122	12945289	13003520	11102649	15336888	16289078	16103276	14295573
24		4080501	4241910	4348465	3759993	4590177	4877996	5104526	4251455
25		2415967	2432337	2503840	2351763	1782871	1688904	1525797	1492025
26		7554549	7232141	7374475	7062213	6370325	6240537	6102655	5777060
27		3736428	3757034	3794812	3713666	2334993	2606462	2602107	2171970
28		7647226	8545126	8451934	6769599	9824717	10840488	10960932	9223981
29		3378469	4131963	4087302	2835976	4971145	5805733	6025788	4840164
Total		303643382	307785568	311885930	283783646	359561051	374307581	372031676	332774992
		WT1	WT3	WT5	WT7	Helix30-2	Helix30-4	Helix30-6	Helix30-8		WT	StDEV	Helix30	StDEV		TDIST
	GM3	6324777	7164998	7547796	7188608	4513583	5989756	5905316	4985681		7.05654e+06	518335	5348584	718790		0.00841469
	GM4	34111206	33352273	34037417	32828755	52092690	50613876	50032186	45975226		3.35824e+07	607623	4.96785e+07	2.61678e+06		2.04708e-05
	GM5	14809795	14868453	15026394	13476752	12849378	13126302	13032439	11110984		1.45453e+07	718246	1.25298e+07	952826		0.0148872
	4-4	2876532	3033287	2966323	2233142	1805451	1956618	1853131	1518293		2777321	368426	1.78337e+06	187648		0.00297648
	GM4*	12908319	15104395	14383728	10944344	31605142	34094436	34142637	27855130		1.33352e+07	1.83738e+06	3.19243e+07	2.96032e+06		3.99562e-05
	GM4-4	32717538	31046214	31836736	31656758	36937749	35379020	34797146	32697108		3.18143e+07	690680	3.49528e+07	1.75443e+06		0.0158253
	GanhM3	19283465	18972504	19370194	17856663	14908037	14771702	14726664	13239707		1.88707e+07	697258	1.44115e+07	785010		0.0001457
	GM4-GM4	7760637	7663352	7896397	7131586	8907478	9316412	9337261	8176318		7612993	334866	8.93437e+06	542723		0.00605098
	GM4-GM5	23126353	19919079	20138418	18055348	33637608	33930895	34882267	32022368		2.03098e+07	2.09742e+06	3.36183e+07	1.18922e+06		3.28718e-05
	GM4*GM4*	9470145	11213390	10668464	7906436	16380139	18070733	18179492	14845670		9.81461e+06	1.46577e+06	1.6869e+07	1.58055e+06		0.000608264
Peak proportions		WT1	WT3	WT5	WT7	Helix30-2	Helix30-4	Helix30-6	Helix30-8		WT	StDEV-WT	Helix30	StDEV-Helix30
	GM3	2.08296	2.32792	2.42005	2.53313	1.2553	1.60022	1.58732	1.49821		2.34102	0.191413	1.56192	0.159874
	GM4	11.234	10.8362	10.9134	11.5682	14.4879	13.522	13.4484	13.8157		11.138	0.334579	13.5954	0.473623
	GM5	4.87736	4.83078	4.81791	4.74895	3.57363	3.50682	3.50305	3.33889		4.81875	0.053081	3.44959	0.0998801
	4-4	0.947339	0.98552	0.951092	0.786917	0.502126	0.52273	0.498111	0.456252		0.917717	0.0888766	0.492364	0.0278727
	GM4*	4.25114	4.90744	4.61186	3.85658	8.78992	9.10867	9.17735	8.37056		4.40676	0.454481	8.88552	0.368328
	GM4-4	10.775	10.087	10.2078	11.1552	10.273	9.45186	9.35328	9.82559		10.5563	0.499426	9.54357	0.417619
	GanhM3	6.35069	6.1642	6.21067	6.29235	4.14618	3.94641	3.95844	3.97858		6.25448	0.0831915	3.96114	0.0934642
	GM4-GM4	2.55584	2.48983	2.53182	2.51304	2.47732	2.48897	2.5098	2.45701		2.52263	0.0280174	2.48526	0.0220714
	GM4-GM5	7.61629	6.47174	6.45698	6.36236	9.35519	9.06498	9.37616	9.62283		6.72684	0.59494	9.35465	0.228249
	GM4*GM4*	3.11884	3.64325	3.42063	2.78608	4.55559	4.82778	4.88654	4.46117		3.2422	0.372353	4.72516	0.206422

## Sheet: WT3
[Header]
Application Name	LCsolution
Version	1.25
Output Date	2016-02-27
Output Time	11:04:34
[Configuration]
# of Detectors	1
Detector ID	Detector A
Detector Name	Detector A
# of Channels	1
[Peak Table(Detector A-Ch1)]
# of Peaks	68
Peak#	R.Time	I.Time	F.Time	Area	Height	A/H	Conc.	Mark	ID#	Name	k'	Plate #	Plate Ht.	Tailing	Resolution	Sep.Factor	Conc. %	Norm Conc.
1	5.634	5.500	6.217	11430162	1304178	8.7640	0.0000				0.000	10411	14.408	1.661	0.000	0.000	0.0000	0.0000
2	6.791	6.417	6.967	9843819	619959	15.8780	0.0000				0.206	6605	22.709	0.000	4.172	0.000	0.0000	0.0000
3	7.110	6.967	7.917	6025718	306754	19.6430	0.0000	V			0.262	2562	58.537	0.000	0.711	1.275	0.0000	0.0000
4	9.523	8.550	9.800	4987470	65746	75.8590	0.0000				0.690	111	1354.304	0.000	1.154	2.634	0.0000	0.0000
5	10.899	9.800	12.267	4560186	35784	127.4380	0.0000	V			0.935	0	0.000	0.000	0.000	1.354	0.0000	0.0000
6	33.298	31.283	33.617	9541840	267732	35.6400	0.0000	V			4.911	27871	5.382	0.000	0.000	5.254	0.0000	0.0000
7	33.841	33.617	39.283	7164998	325991	21.9790	0.0000	SV			5.007	79466	1.888	0.000	0.849	1.020	0.0000	0.0000
8	40.320	39.283	42.317	33352273	768196	43.4160	0.0000	SV			6.157	23499	6.383	1.074	8.457	1.230	0.0000	0.0000
9	43.515	42.317	44.183	14868453	512668	29.0020	0.0000	V			6.724	73010	2.055	0.825	3.767	1.092	0.0000	0.0000
10	44.961	44.183	45.133	1072626	43435	24.6950	0.0000	V			6.981	75673	1.982	0.000	2.227	1.038	0.0000	0.0000
11	45.660	45.133	46.117	3033287	154843	19.5890	0.0000	V			7.105	213251	0.703	0.000	1.332	1.018	0.0000	0.0000
12	49.198	48.467	49.483	1761273	65674	26.8180	0.0000	V			7.733	98986	1.515	0.000	6.930	1.088	0.0000	0.0000
13	49.693	49.483	49.867	1064695	68031	15.6500	0.0000	V			7.821	174638	0.859	0.000	0.900	1.011	0.0000	0.0000
14	50.708	49.867	51.450	20916386	521444	40.1120	0.0000	V			8.001	50716	2.958	0.000	1.474	1.023	0.0000	0.0000
15	53.317	52.100	53.700	8790348	345389	25.4510	0.0000	V			8.464	221935	0.676	0.000	3.855	1.058	0.0000	0.0000
16	53.898	53.700	54.150	1984104	108429	18.2990	0.0000	V			8.567	159259	0.942	0.000	1.171	1.012	0.0000	0.0000
17	54.945	54.150	55.617	31046214	851487	36.4610	0.0000	V			8.753	79790	1.880	0.876	1.589	1.022	0.0000	0.0000
18	56.458	55.617	56.917	18972504	686135	27.6510	0.0000	V			9.022	149654	1.002	0.000	2.221	1.031	0.0000	0.0000
19	57.022	56.917	57.250	1156390	65428	17.6740	0.0000	V			9.122	22805	6.578	0.000	0.539	1.011	0.0000	0.0000
20	57.647	57.250	57.850	1868731	60563	30.8560	0.0000	V			9.233	12782	11.735	0.000	0.352	1.012	0.0000	0.0000
21	57.999	57.850	58.200	1018376	59935	16.9910	0.0000	V			9.295	102972	1.457	0.000	0.255	1.007	0.0000	0.0000
22	58.550	58.400	58.717	875554	53624	16.3280	0.0000	V			9.393	83544	1.795	0.000	0.719	1.011	0.0000	0.0000
23	59.245	58.717	59.550	3292532	105331	31.2590	0.0000	V			9.516	94962	1.580	0.000	0.881	1.013	0.0000	0.0000
24	60.279	59.550	60.617	7663352	262815	29.1590	0.0000	V			9.700	200568	0.748	0.000	1.581	1.019	0.0000	0.0000
25	61.286	60.617	61.500	17803584	681512	26.1240	0.0000	V			9.879	58268	2.574	0.000	1.297	1.018	0.0000	0.0000
26	61.695	61.500	62.033	19919079	745123	26.7330	0.0000	V			9.951	49530	3.028	0.000	0.385	1.007	0.0000	0.0000
27	62.200	62.033	62.750	13625663	580577	23.4690	0.0000	V			10.041	75413	1.989	0.000	0.502	1.009	0.0000	0.0000
28	62.958	62.750	63.283	4377633	224308	19.5160	0.0000	V			10.176	247797	0.605	0.000	1.074	1.013	0.0000	0.0000
29	63.505	63.283	63.983	3890590	157328	24.7290	0.0000	V			10.273	193633	0.775	0.000	1.009	1.010	0.0000	0.0000
30	64.265	63.983	64.433	2529780	128185	19.7350	0.0000	V			10.408	128218	1.170	0.000	1.175	1.013	0.0000	0.0000
31	64.631	64.433	65.117	4849251	182802	26.5270	0.0000	V			10.472	79264	1.892	0.000	0.446	1.006	0.0000	0.0000
32	65.317	65.117	65.483	2063787	113908	18.1180	0.0000	V			10.594	90970	1.649	0.000	0.769	1.012	0.0000	0.0000
33	66.079	65.483	66.217	8473737	335440	25.2620	0.0000	V			10.730	127025	1.181	0.000	0.949	1.013	0.0000	0.0000
34	66.346	66.217	66.683	6499544	344627	18.8600	0.0000	V			10.777	115419	1.300	0.000	0.350	1.004	0.0000	0.0000
35	66.867	66.683	67.017	2531861	151297	16.7340	0.0000	V			10.869	122409	1.225	0.000	0.675	1.009	0.0000	0.0000
36	67.413	67.017	67.533	4885403	199429	24.4970	0.0000	V			10.966	7924	18.931	0.000	0.288	1.009	0.0000	0.0000
37	67.765	67.533	67.967	8512346	446809	19.0510	0.0000	V			11.029	182569	0.822	0.000	0.192	1.006	0.0000	0.0000
38	68.135	67.967	68.533	11213390	516118	21.7260	0.0000	V			11.095	173974	0.862	0.000	0.575	1.006	0.0000	0.0000
39	68.898	68.533	68.967	5163234	259349	19.9080	0.0000	V			11.230	9414	15.934	0.000	0.437	1.012	0.0000	0.0000
40	69.158	68.967	69.933	11981508	448429	26.7190	0.0000	V			11.276	197005	0.761	0.000	0.150	1.004	0.0000	0.0000
41	70.903	69.933	71.167	12945289	321961	40.2080	0.0000	V			11.586	61184	2.452	0.000	1.972	1.027	0.0000	0.0000
42	71.318	71.167	71.567	4241910	222938	19.0270	0.0000	V			11.659	153304	0.978	0.000	0.442	1.006	0.0000	0.0000
43	71.703	71.567	71.850	2432337	154497	15.7440	0.0000	V			11.728	43893	3.417	0.000	0.367	1.006	0.0000	0.0000
44	72.103	71.850	72.583	7232141	288304	25.0850	0.0000	V			11.799	233665	0.642	0.000	0.408	1.006	0.0000	0.0000
45	73.096	72.583	73.250	3757034	109611	34.2760	0.0000	V			11.975	20820	7.204	0.000	0.757	1.015	0.0000	0.0000
46	73.426	73.250	73.650	2493151	130226	19.1450	0.0000	V			12.034	147720	1.015	0.000	0.236	1.005	0.0000	0.0000
47	73.794	73.650	74.100	1976231	94872	20.8300	0.0000	V			12.099	125492	1.195	0.000	0.462	1.005	0.0000	0.0000
48	74.944	74.100	75.400	10573281	254696	41.5130	0.0000	V			12.303	69963	2.144	0.000	1.170	1.017	0.0000	0.0000
49	75.598	75.400	75.800	4131963	229341	18.0170	0.0000	V			12.419	252245	0.595	0.000	0.753	1.009	0.0000	0.0000
50	75.909	75.800	76.133	2964514	158028	18.7590	0.0000	V			12.474	21896	6.850	0.000	0.234	1.004	0.0000	0.0000
51	76.313	76.133	76.533	3591215	191317	18.7710	0.0000	V			12.546	175462	0.855	0.000	0.291	1.006	0.0000	0.0000
52	76.660	76.533	76.950	2251482	123090	18.2910	0.0000	V			12.608	174996	0.857	0.000	0.474	1.005	0.0000	0.0000
53	77.000	76.950	77.433	1382776	55426	24.9480	0.0000	V			12.668	3540	42.372	0.000	0.115	1.005	0.0000	0.0000
54	77.574	77.433	78.167	1348274	40080	33.6400	0.0000	V			12.770	10964	13.681	0.000	0.141	1.008	0.0000	0.0000
55	79.488	78.450	79.567	3123552	79260	39.4090	0.0000	V			13.110	1983	75.625	0.000	0.379	1.027	0.0000	0.0000
56	79.617	79.567	79.817	1145819	78779	14.5450	0.0000	V			13.133	470	318.968	0.000	0.012	1.002	0.0000	0.0000
57	80.198	79.817	80.400	3006319	99503	30.2130	0.0000	V			13.236	11140	13.465	0.000	0.066	1.008	0.0000	0.0000
58	80.573	80.400	80.883	2424696	130198	18.6230	0.0000	V			13.302	333027	0.450	0.000	0.209	1.005	0.0000	0.0000
59	81.142	80.883	81.633	1540977	48699	31.6430	0.0000	V			13.403	789	190.113	0.000	0.094	1.008	0.0000	0.0000
60	83.183	82.600	83.400	1189626	33361	35.6600	0.0000	V			13.766	35943	4.173	0.000	0.307	1.027	0.0000	0.0000
61	83.913	83.733	84.250	944347	34772	27.1580	0.0000	V			13.895	4015	37.361	0.000	0.207	1.009	0.0000	0.0000
62	84.397	84.250	84.950	975207	31225	31.2320	0.0000	V			13.981	46764	3.208	0.000	0.141	1.006	0.0000	0.0000
63	89.950	89.283	90.283	848188	17545	48.3440	0.0000	V			14.967	31819	4.714	0.000	3.104	1.070	0.0000	0.0000
64	90.802	90.283	92.117	1499265	23676	63.3240	0.0000	V			15.118	37810	3.967	0.000	0.439	1.010	0.0000	0.0000
65	127.711	127.167	128.667	793829	12081	65.7070	0.0000	V			21.670	39478	3.800	0.000	16.630	1.433	0.0000	0.0000
66	132.670	132.033	133.633	777441	12875	60.3850	0.0000	V			22.550	124023	1.209	0.000	2.432	1.041	0.0000	0.0000
67	146.126	144.983	146.717	1001095	16636	60.1770	0.0000				24.939	83600	1.794	0.000	7.628	1.106	0.0000	0.0000
68	156.514	155.817	159.933	2926886	11110	263.4390	0.0000				26.782	23992	6.252	3.041	3.426	1.074	0.0000	0.0000
[Peak Table(PDA-Ch1)]
# of Peaks	0
Width	10	sec
Slope	1000	uV/min
Drift	0	uV/min
T.DBL	1000	min
Min area	750000	counts

## Sheet: WT5
[Header]
Application Name	LCsolution
Version	1.25
Output Date	2016-02-27
Output Time	11:03:17
[Configuration]
# of Detectors	1
Detector ID	Detector A
Detector Name	Detector A
# of Channels	1
[Peak Table(Detector A-Ch1)]
# of Peaks	69
Peak#	R.Time	I.Time	F.Time	Area	Height	A/H	Conc.	Mark	ID#	Name	k'	Plate #	Plate Ht.	Tailing	Resolution	Sep.Factor	Conc. %	Norm Conc.
1	5.620	5.500	6.200	10687024	1314900	8.1280	0.0000				0.000	11312	13.260	1.516	0.000	0.000	0.0000	0.0000
2	6.785	6.450	6.983	9543920	623604	15.3040	0.0000				0.207	6358	23.594	0.000	4.223	0.000	0.0000	0.0000
3	7.138	6.983	7.967	6522046	306681	21.2670	0.0000	V			0.270	2302	65.159	0.000	0.754	1.303	0.0000	0.0000
4	9.489	8.517	9.767	5144165	68299	75.3180	0.0000				0.688	100	1501.942	0.000	1.070	2.549	0.0000	0.0000
5	10.928	9.767	12.467	5224671	38616	135.3000	0.0000	V			0.945	0	0.000	0.000	0.000	1.372	0.0000	0.0000
6	33.290	31.817	33.617	9643819	283125	34.0620	0.0000	V			4.924	30500	4.918	0.000	0.000	5.213	0.0000	0.0000
7	33.838	33.617	39.267	7547796	338568	22.2930	0.0000	SV			5.021	78455	1.912	0.000	0.879	1.020	0.0000	0.0000
8	40.298	39.267	42.300	34037417	773989	43.9770	0.0000	SV			6.171	22960	6.533	1.076	8.351	1.229	0.0000	0.0000
9	43.493	42.300	44.150	15026394	517775	29.0210	0.0000	V			6.739	72799	2.060	0.826	3.740	1.092	0.0000	0.0000
10	44.947	44.150	45.133	1104916	43336	25.4960	0.0000	V			6.998	75044	1.999	0.000	2.235	1.038	0.0000	0.0000
11	45.644	45.133	46.083	2966323	153659	19.3050	0.0000	V			7.122	215603	0.696	0.000	1.328	1.018	0.0000	0.0000
12	49.132	48.417	49.433	1828321	68684	26.6190	0.0000	V			7.743	102317	1.466	0.000	6.924	1.087	0.0000	0.0000
13	49.651	49.433	49.833	1094745	68756	15.9220	0.0000	V			7.835	182984	0.820	0.000	0.962	1.012	0.0000	0.0000
14	50.669	49.833	51.400	20539837	515487	39.8460	0.0000	V			8.016	51876	2.892	0.000	1.503	1.023	0.0000	0.0000
15	53.259	52.050	53.650	9041121	356349	25.3720	0.0000	V			8.477	223785	0.670	0.000	3.865	1.057	0.0000	0.0000
16	53.841	53.650	54.083	1924136	107695	17.8670	0.0000	V			8.581	159090	0.943	0.000	1.177	1.012	0.0000	0.0000
17	54.872	54.083	55.550	31836736	860534	36.9960	0.0000	V			8.764	77660	1.932	0.882	1.553	1.021	0.0000	0.0000
18	56.382	55.550	56.850	19370194	694814	27.8780	0.0000	V			9.033	147881	1.014	0.000	2.197	1.031	0.0000	0.0000
19	56.946	56.850	57.167	1134338	67268	16.8630	0.0000	V			9.133	23415	6.406	0.000	0.544	1.011	0.0000	0.0000
20	57.307	57.167	57.450	869524	53119	16.3690	0.0000	V			9.198	8087	18.549	0.000	0.179	1.007	0.0000	0.0000
21	57.607	57.450	57.783	1111441	62813	17.6940	0.0000	V			9.251	48357	3.102	0.000	0.167	1.006	0.0000	0.0000
22	57.923	57.783	58.117	1024990	62603	16.3730	0.0000	V			9.307	96421	1.556	0.000	0.353	1.006	0.0000	0.0000
23	58.476	58.317	58.633	921772	56438	16.3330	0.0000	V			9.405	79792	1.880	0.000	0.702	1.011	0.0000	0.0000
24	59.167	58.633	59.450	3347715	108169	30.9490	0.0000	V			9.528	91784	1.634	0.000	0.858	1.013	0.0000	0.0000
25	60.208	59.450	60.550	7896397	265659	29.7240	0.0000	V			9.714	196578	0.763	0.000	1.573	1.019	0.0000	0.0000
26	61.224	60.550	61.433	18301514	698762	26.1910	0.0000	V			9.895	59095	2.538	0.000	1.311	1.019	0.0000	0.0000
27	61.627	61.433	61.967	20138418	750505	26.8330	0.0000	V			9.966	47477	3.159	0.000	0.376	1.007	0.0000	0.0000
28	62.145	61.967	62.700	13934886	580774	23.9940	0.0000	V			10.058	60851	2.465	0.000	0.484	1.009	0.0000	0.0000
29	62.898	62.700	63.217	4299141	225592	19.0570	0.0000	V			10.192	250777	0.598	0.000	0.997	1.013	0.0000	0.0000
30	63.444	63.217	63.917	3935874	159252	24.7150	0.0000	V			10.289	201044	0.746	0.000	1.023	1.010	0.0000	0.0000
31	64.208	63.917	64.383	2626209	129300	20.3110	0.0000	V			10.426	129950	1.154	0.000	1.196	1.013	0.0000	0.0000
32	64.584	64.383	65.050	4746658	188932	25.1240	0.0000	V			10.492	92247	1.626	0.000	0.480	1.006	0.0000	0.0000
33	65.273	65.050	65.433	2187847	117883	18.5600	0.0000	V			10.615	90467	1.658	0.000	0.801	1.012	0.0000	0.0000
34	66.032	65.433	66.167	8675325	345396	25.1170	0.0000	V			10.750	126674	1.184	0.000	0.944	1.013	0.0000	0.0000
35	66.299	66.167	66.633	6723676	353896	18.9990	0.0000	V			10.798	112324	1.335	0.000	0.348	1.004	0.0000	0.0000
36	66.825	66.633	66.983	2661821	149825	17.7660	0.0000	V			10.891	99360	1.510	0.000	0.642	1.009	0.0000	0.0000
37	67.367	66.983	67.500	4994476	199798	24.9980	0.0000	V			10.988	6140	24.429	0.000	0.253	1.009	0.0000	0.0000
38	67.720	67.500	67.933	8482706	443065	19.1450	0.0000	V			11.050	184483	0.813	0.000	0.174	1.006	0.0000	0.0000
39	68.091	67.933	68.483	10668464	504478	21.1480	0.0000	V			11.116	180970	0.829	0.000	0.584	1.006	0.0000	0.0000
40	68.848	68.483	68.933	5551815	268751	20.6580	0.0000	V			11.251	12138	12.358	0.000	0.482	1.012	0.0000	0.0000
41	69.110	68.933	69.883	11839352	454330	26.0590	0.0000	V			11.298	193154	0.777	0.000	0.168	1.004	0.0000	0.0000
42	70.867	69.883	71.133	13003520	321642	40.4280	0.0000	V			11.610	60646	2.473	0.000	1.974	1.028	0.0000	0.0000
43	71.284	71.133	71.533	4348465	226713	19.1800	0.0000	V			11.685	149046	1.006	0.000	0.441	1.006	0.0000	0.0000
44	71.669	71.533	71.817	2503840	159243	15.7230	0.0000	V			11.753	45188	3.319	0.000	0.370	1.006	0.0000	0.0000
45	72.070	71.817	72.550	7374475	297599	24.7800	0.0000	V			11.825	244021	0.615	0.000	0.415	1.006	0.0000	0.0000
46	73.063	72.550	73.217	3794812	107845	35.1880	0.0000	V			12.001	24482	6.127	0.000	0.810	1.015	0.0000	0.0000
47	73.390	73.217	73.617	2433970	126634	19.2210	0.0000	V			12.059	143031	1.049	0.000	0.247	1.005	0.0000	0.0000
48	73.747	73.617	74.050	1848921	93905	19.6890	0.0000	V			12.123	136387	1.100	0.000	0.453	1.005	0.0000	0.0000
49	74.905	74.050	75.117	8451934	250297	33.7680	0.0000	V			12.329	72323	2.074	0.000	1.210	1.017	0.0000	0.0000
50	75.173	75.117	75.367	1952878	147359	13.2520	0.0000	V			12.377	12175	12.320	0.000	0.140	1.004	0.0000	0.0000
51	75.567	75.367	75.767	4087302	225121	18.1560	0.0000	V			12.447	237852	0.631	0.000	0.236	1.006	0.0000	0.0000
52	75.875	75.767	76.117	3164158	162470	19.4750	0.0000	V			12.502	23793	6.304	0.000	0.238	1.004	0.0000	0.0000
53	76.286	76.117	76.500	3439150	190529	18.0510	0.0000	V			12.575	181175	0.828	0.000	0.307	1.006	0.0000	0.0000
54	76.633	76.500	76.917	2259889	123390	18.3150	0.0000	V			12.636	188062	0.798	0.000	0.487	1.005	0.0000	0.0000
55	76.976	76.917	77.417	1378352	55133	25.0010	0.0000	V			12.697	8978	16.707	0.000	0.173	1.005	0.0000	0.0000
56	77.529	77.417	77.867	794978	35003	22.7120	0.0000	V			12.796	36241	4.139	0.000	0.227	1.008	0.0000	0.0000
57	78.246	77.867	78.433	827985	25367	32.6400	0.0000	V			12.923	4750	31.577	0.000	0.232	1.010	0.0000	0.0000
58	79.455	78.433	79.533	3025275	77728	38.9210	0.0000	V			13.138	2774	54.081	0.000	0.228	1.017	0.0000	0.0000
59	79.601	79.533	79.767	1065052	77417	13.7570	0.0000	V			13.165	1039	144.427	0.000	0.018	1.002	0.0000	0.0000
60	80.176	79.767	80.383	3140189	97845	32.0930	0.0000	V			13.267	11964	12.537	0.000	0.090	1.008	0.0000	0.0000
61	80.546	80.383	80.983	2661060	129350	20.5730	0.0000	V			13.333	323202	0.464	0.000	0.211	1.005	0.0000	0.0000
62	81.126	80.983	81.583	1160081	46235	25.0910	0.0000	V			13.436	59573	2.518	0.000	0.612	1.008	0.0000	0.0000
63	83.136	82.517	83.350	1276568	34758	36.7270	0.0000	V			13.794	45172	3.321	0.000	1.389	1.027	0.0000	0.0000
64	83.862	83.667	84.250	1132509	36956	30.6450	0.0000	V			13.923	20546	7.301	0.000	0.372	1.009	0.0000	0.0000
65	84.340	84.250	84.867	779593	29176	26.7210	0.0000	V			14.008	17539	8.552	0.000	0.196	1.006	0.0000	0.0000
66	90.717	90.633	91.800	833280	19823	42.0360	0.0000	V			15.143	73	2062.931	0.000	0.283	1.081	0.0000	0.0000
67	106.532	105.400	107.050	807647	11607	69.5850	0.0000	V			17.957	34202	4.386	0.000	0.705	1.186	0.0000	0.0000
68	145.378	144.367	146.467	1151732	14590	78.9400	0.0000	V			24.869	67823	2.212	0.000	17.124	1.385	0.0000	0.0000
69	155.932	154.267	159.933	5865751	21893	267.9270	0.0000				26.747	12606	11.899	1.744	2.710	1.076	0.0000	0.0000
[Peak Table(PDA-Ch1)]
# of Peaks	0
Width	10	sec
Slope	1000	uV/min
Drift	0	uV/min
T.DBL	1000	min
Min area	750000	counts

## Sheet: WT7
[Header]
Application Name	LCsolution
Version	1.25
Output Date	2016-02-27
Output Time	11:06:44
[Configuration]
# of Detectors	1
Detector ID	Detector A
Detector Name	Detector A
# of Channels	1
[Peak Table(Detector A-Ch1)]
# of Peaks	78
Peak#	R.Time	I.Time	F.Time	Area	Height	A/H	Conc.	Mark	ID#	Name	k'	Plate #	Plate Ht.	Tailing	Resolution	Sep.Factor	Conc. %	Norm Conc.
1	5.625	5.500	6.217	13831093	1431676	9.6610	0.0000				0.000	9323	16.090	2.327	0.000	0.000	0.0000	0.0000
2	6.871	6.517	7.050	10660386	671315	15.8800	0.0000				0.221	5244	28.602	0.000	4.068	0.000	0.0000	0.0000
3	7.198	7.050	8.317	10479713	392489	26.7010	0.0000	V			0.280	1947	77.023	0.000	0.633	1.262	0.0000	0.0000
4	9.533	8.317	9.733	6408994	80093	80.0200	0.0000	V			0.695	97	1548.107	0.000	1.032	2.485	0.0000	0.0000
5	10.959	9.733	12.317	6072426	43863	138.4420	0.0000	V			0.948	0	0.000	0.000	0.000	1.365	0.0000	0.0000
6	33.325	31.883	33.650	9164946	277358	33.0440	0.0000	V			4.924	34693	4.324	0.000	0.000	5.193	0.0000	0.0000
7	33.878	33.650	39.267	7188608	327643	21.9400	0.0000	SV			5.022	83203	1.803	0.000	0.934	1.020	0.0000	0.0000
8	40.319	39.267	42.317	32828755	764002	42.9690	0.0000	SV			6.167	24432	6.140	1.060	8.578	1.228	0.0000	0.0000
9	43.519	42.317	44.183	13476752	482067	27.9560	0.0000	V			6.736	81382	1.843	0.808	3.898	1.092	0.0000	0.0000
10	44.967	44.467	45.150	764830	33088	23.1150	0.0000	V			6.993	68292	2.196	0.000	2.230	1.038	0.0000	0.0000
11	45.670	45.150	46.100	2233142	114206	19.5540	0.0000	V			7.118	217174	0.691	0.000	1.302	1.018	0.0000	0.0000
12	49.130	48.183	49.450	1810478	65880	27.4820	0.0000	V			7.733	114625	1.309	0.000	7.116	1.086	0.0000	0.0000
13	49.675	49.450	49.883	987303	62196	15.8740	0.0000	V			7.830	221129	0.678	0.000	1.088	1.013	0.0000	0.0000
14	50.510	49.883	50.583	4926308	242581	20.3080	0.0000	V			7.979	10483	14.309	0.000	0.697	1.019	0.0000	0.0000
15	50.759	50.583	51.417	10944344	438130	24.9800	0.0000	V			8.023	70987	2.113	0.000	0.182	1.006	0.0000	0.0000
16	53.287	52.067	53.683	8848827	354664	24.9500	0.0000	V			8.472	233215	0.643	0.000	4.201	1.056	0.0000	0.0000
17	53.874	53.683	54.100	1505116	84583	17.7950	0.0000	V			8.577	151086	0.993	0.000	1.179	1.012	0.0000	0.0000
18	54.893	54.100	55.567	31656758	861816	36.7330	0.0000	V			8.758	78896	1.901	0.891	1.526	1.021	0.0000	0.0000
19	56.411	55.567	56.850	17856663	664469	26.8740	0.0000	V			9.028	162764	0.922	0.000	2.264	1.031	0.0000	0.0000
20	56.963	56.850	57.183	1219559	70018	17.4180	0.0000	V			9.126	36031	4.163	0.000	0.627	1.011	0.0000	0.0000
21	57.308	57.183	57.467	839540	51528	16.2930	0.0000	V			9.187	9033	16.606	0.000	0.191	1.007	0.0000	0.0000
22	57.618	57.467	57.800	1032966	58115	17.7750	0.0000	V			9.242	45491	3.297	0.000	0.178	1.006	0.0000	0.0000
23	57.930	57.800	58.133	955027	58598	16.2980	0.0000	V			9.298	97334	1.541	0.000	0.343	1.006	0.0000	0.0000
24	58.486	58.333	58.650	883645	53645	16.4720	0.0000	V			9.397	74568	2.012	0.000	0.695	1.011	0.0000	0.0000
25	59.178	58.650	59.467	3219882	105668	30.4720	0.0000	V			9.520	104932	1.429	0.000	0.872	1.013	0.0000	0.0000
26	60.227	59.467	60.550	7131586	238807	29.8630	0.0000	V			9.706	188277	0.797	0.000	1.630	1.020	0.0000	0.0000
27	61.226	60.550	61.467	18371235	689437	26.6470	0.0000	V			9.884	78115	1.920	0.000	1.396	1.018	0.0000	0.0000
28	61.663	61.467	61.983	18055348	704805	25.6180	0.0000	V			9.961	59591	2.517	0.000	0.463	1.008	0.0000	0.0000
29	62.164	61.983	62.700	12671079	550358	23.0230	0.0000	V			10.051	82988	1.807	0.000	0.535	1.009	0.0000	0.0000
30	62.917	62.700	63.233	3686341	188232	19.5840	0.0000	V			10.184	248455	0.604	0.000	1.100	1.013	0.0000	0.0000
31	63.460	63.233	63.950	3596482	139424	25.7950	0.0000	V			10.281	188368	0.796	0.000	0.996	1.009	0.0000	0.0000
32	64.216	63.950	64.383	2352484	121411	19.3760	0.0000	V			10.415	127076	1.180	0.000	1.159	1.013	0.0000	0.0000
33	64.605	64.383	65.017	4568997	205474	22.2360	0.0000	V			10.484	213480	0.703	0.000	0.607	1.007	0.0000	0.0000
34	65.294	65.017	65.450	2290081	116228	19.7030	0.0000	V			10.607	106944	1.403	0.000	1.016	1.012	0.0000	0.0000
35	66.056	65.450	66.183	8212628	334228	24.5720	0.0000	V			10.742	130511	1.149	0.000	0.995	1.013	0.0000	0.0000
36	66.319	66.183	66.650	6493455	343523	18.9030	0.0000	V			10.789	120816	1.242	0.000	0.353	1.004	0.0000	0.0000
37	66.855	66.650	67.000	2279733	124303	18.3400	0.0000	V			10.884	65434	2.292	0.000	0.592	1.009	0.0000	0.0000
38	67.115	67.000	67.183	1232179	116667	10.5610	0.0000	V			10.931	6034	24.858	0.000	0.116	1.004	0.0000	0.0000
39	67.377	67.183	67.550	3350759	170984	19.5970	0.0000	V			10.977	26606	5.638	0.000	0.102	1.004	0.0000	0.0000
40	67.769	67.550	67.983	6777133	367958	18.4180	0.0000	V			11.047	227721	0.659	0.000	0.353	1.006	0.0000	0.0000
41	68.159	67.983	68.500	7906436	388570	20.3480	0.0000	V			11.116	211948	0.708	0.000	0.673	1.006	0.0000	0.0000
42	68.850	68.500	68.950	5368424	253930	21.1410	0.0000	V			11.239	31091	4.825	0.000	0.642	1.011	0.0000	0.0000
43	69.128	68.950	69.900	10727592	430152	24.9390	0.0000	V			11.288	215438	0.696	0.000	0.257	1.004	0.0000	0.0000
44	70.905	69.900	71.167	11102649	269073	41.2630	0.0000	V			11.604	58793	2.551	0.000	2.013	1.028	0.0000	0.0000
45	71.320	71.167	71.550	3759993	204678	18.3700	0.0000	V			11.678	167708	0.894	0.000	0.445	1.006	0.0000	0.0000
46	71.689	71.550	71.833	2351763	152191	15.4530	0.0000	V			11.744	64727	2.317	0.000	0.405	1.006	0.0000	0.0000
47	72.086	71.833	72.567	7062213	288228	24.5020	0.0000	V			11.814	255380	0.587	0.000	0.468	1.006	0.0000	0.0000
48	73.098	72.567	73.267	3713666	98591	37.6670	0.0000	V			11.994	22418	6.691	0.000	0.802	1.015	0.0000	0.0000
49	73.435	73.267	73.650	2122586	114423	18.5500	0.0000	V			12.054	146205	1.026	0.000	0.248	1.005	0.0000	0.0000
50	73.768	73.650	74.050	1470180	80298	18.3090	0.0000	V			12.113	117015	1.282	0.000	0.408	1.005	0.0000	0.0000
51	74.945	74.050	75.400	8063677	196836	40.9660	0.0000	V			12.322	78335	1.915	0.000	1.217	1.017	0.0000	0.0000
52	75.609	75.400	75.767	2835976	163254	17.3720	0.0000	V			12.441	170023	0.882	0.000	0.736	1.010	0.0000	0.0000
53	75.894	75.767	76.133	2864068	140411	20.3980	0.0000	V			12.491	24125	6.218	0.000	0.212	1.004	0.0000	0.0000
54	76.299	76.133	76.517	3007787	166400	18.0760	0.0000	V			12.563	182744	0.821	0.000	0.304	1.006	0.0000	0.0000
55	76.643	76.517	76.917	2025626	114228	17.7330	0.0000	V			12.624	190183	0.789	0.000	0.485	1.005	0.0000	0.0000
56	76.971	76.917	77.433	1245874	51953	23.9810	0.0000	V			12.683	9032	16.607	0.000	0.167	1.005	0.0000	0.0000
57	78.057	77.800	78.450	837147	22775	36.7570	0.0000	V			12.876	17696	8.476	0.000	0.389	1.015	0.0000	0.0000
58	79.415	78.450	79.567	2703132	68209	39.6300	0.0000	V			13.117	24841	6.038	0.000	0.623	1.019	0.0000	0.0000
59	79.869	79.567	79.950	1494212	67843	22.0250	0.0000	V			13.198	1230	121.974	0.000	0.082	1.006	0.0000	0.0000
60	80.168	79.950	80.367	1853136	81515	22.7340	0.0000	V			13.251	45979	3.262	0.000	0.056	1.004	0.0000	0.0000
61	80.522	80.367	80.933	2156331	108818	19.8160	0.0000	V			13.314	337607	0.444	0.000	0.346	1.005	0.0000	0.0000
62	81.087	80.933	81.550	1039818	41871	24.8340	0.0000	V			13.414	135572	1.106	0.000	0.787	1.008	0.0000	0.0000
63	83.110	82.483	83.317	1110046	28833	38.4990	0.0000	V			13.774	36511	4.108	0.000	1.544	1.027	0.0000	0.0000
64	83.815	83.650	84.267	1031465	32484	31.7530	0.0000	V			13.899	23560	6.367	0.000	0.359	1.009	0.0000	0.0000
65	90.721	90.583	91.717	756009	16181	46.7230	0.0000	V			15.127	8191	18.313	0.000	2.230	1.088	0.0000	0.0000
66	126.492	125.617	126.933	769843	13313	57.8270	0.0000	V			21.486	51263	2.926	0.000	11.457	1.420	0.0000	0.0000
67	131.313	130.350	131.933	1000708	13382	74.7810	0.0000	V			22.343	32974	4.549	0.000	1.880	1.040	0.0000	0.0000
68	133.405	131.933	133.933	1660790	17871	92.9350	0.0000	V			22.715	18621	8.055	0.000	0.615	1.017	0.0000	0.0000
69	134.921	134.700	135.833	815917	13631	59.8590	0.0000	V			22.984	3568	42.041	0.000	0.234	1.012	0.0000	0.0000
70	136.882	136.283	137.283	903484	19044	47.4410	0.0000	V			23.333	95241	1.575	0.000	0.363	1.015	0.0000	0.0000
71	137.657	137.283	138.217	766618	16645	46.0560	0.0000	V			23.470	67237	2.231	0.000	0.397	1.006	0.0000	0.0000
72	138.906	138.217	139.300	779768	13653	57.1130	0.0000	V			23.693	6716	22.336	0.000	0.281	1.009	0.0000	0.0000
73	141.937	140.967	142.350	1131075	17678	63.9830	0.0000	V			24.231	9248	16.219	0.000	0.478	1.023	0.0000	0.0000
74	143.037	142.350	143.567	1106579	16261	68.0520	0.0000	V			24.427	10339	14.509	0.000	0.191	1.008	0.0000	0.0000
75	145.204	144.367	145.567	1337746	20993	63.7240	0.0000	V			24.812	3377	44.422	0.000	0.277	1.016	0.0000	0.0000
76	145.830	145.567	146.383	921865	20114	45.8320	0.0000	V			24.923	889	168.730	0.000	0.042	1.004	0.0000	0.0000
77	146.901	146.383	148.500	2030962	21538	94.2980	0.0000	V			25.114	10442	14.365	0.000	0.085	1.008	0.0000	0.0000
78	155.555	154.567	159.933	5379815	14447	372.3870	0.0000				26.652	13405	11.190	2.812	1.556	1.061	0.0000	0.0000
[Peak Table(PDA-Ch1)]
# of Peaks	0
Width	10	sec
Slope	1000	uV/min
Drift	0	uV/min
T.DBL	1000	min
Min area	750000	counts

## Sheet: Helix30-2
[Header]
Application Name	LCsolution
Version	1.25
Output Date	2016-02-27
Output Time	11:08:20
[Configuration]
# of Detectors	1
Detector ID	Detector A
Detector Name	Detector A
# of Channels	1
[Peak Table(Detector A-Ch1)]
# of Peaks	64
Peak#	R.Time	I.Time	F.Time	Area	Height	A/H	Conc.	Mark	ID#	Name	k'	Plate #	Plate Ht.	Tailing	Resolution	Sep.Factor	Conc. %	Norm Conc.
1	5.635	5.500	6.433	15089578	1385287	10.8930	0.0000				0.000	8332	18.003	2.750	0.000	0.000	0.0000	0.0000
2	6.826	6.450	7.000	10408591	636607	16.3500	0.0000				0.211	5729	26.182	0.000	3.920	0.000	0.0000	0.0000
3	7.140	7.000	8.017	7683889	360940	21.2890	0.0000	V			0.267	2446	61.319	0.000	0.670	1.264	0.0000	0.0000
4	9.448	8.017	9.800	4649671	60418	76.9590	0.0000	V			0.677	160	939.945	0.000	1.293	2.533	0.0000	0.0000
5	10.853	9.800	11.567	2706929	21174	127.8400	0.0000	V			0.926	0	0.000	0.000	0.000	1.369	0.0000	0.0000
6	33.355	31.383	33.700	10125762	299018	33.8630	0.0000	V			4.919	39214	3.825	0.000	0.000	5.312	0.0000	0.0000
7	33.915	33.700	34.400	4513583	252299	17.8900	0.0000	V			5.019	84699	1.771	0.000	0.982	1.020	0.0000	0.0000
8	40.058	39.217	42.300	52092690	897171	58.0630	0.0000	SV			6.109	12438	12.060	1.288	6.457	1.217	0.0000	0.0000
9	43.566	42.300	44.233	12849378	456488	28.1480	0.0000	V			6.731	81683	1.836	0.792	3.428	1.102	0.0000	0.0000
10	45.681	45.133	46.067	1817301	90021	20.1870	0.0000	V			7.107	218675	0.686	0.000	4.229	1.056	0.0000	0.0000
11	49.158	48.633	49.400	1826533	68772	26.5590	0.0000	V			7.724	67383	2.226	0.000	6.056	1.087	0.0000	0.0000
12	50.399	49.400	52.133	43856369	748114	58.6230	0.0000	SV			7.944	18066	8.303	1.004	1.099	1.029	0.0000	0.0000
13	53.294	52.133	53.767	11463774	448125	25.5820	0.0000	V			8.458	203192	0.738	0.000	2.935	1.065	0.0000	0.0000
14	53.951	53.767	54.117	1307742	80125	16.3210	0.0000	V			8.574	129364	1.160	0.000	1.224	1.014	0.0000	0.0000
15	54.890	54.117	55.633	36937749	901126	40.9910	0.0000	V			8.741	62795	2.389	0.000	1.273	1.019	0.0000	0.0000
16	56.498	55.633	56.900	14908037	583198	25.5630	0.0000	V			9.026	184687	0.812	0.000	2.293	1.033	0.0000	0.0000
17	57.031	56.900	57.300	1424305	74397	19.1450	0.0000	V			9.121	73342	2.045	0.000	0.779	1.010	0.0000	0.0000
18	57.634	57.300	57.850	1576552	53300	29.5790	0.0000	V			9.228	6624	22.645	0.000	0.328	1.012	0.0000	0.0000
19	57.988	57.850	58.183	898190	54574	16.4580	0.0000	V			9.291	85653	1.751	0.000	0.195	1.007	0.0000	0.0000
20	59.220	58.683	59.533	3845330	129455	29.7040	0.0000	V			9.509	115548	1.298	0.000	1.655	1.024	0.0000	0.0000
21	60.244	59.533	60.583	8907478	316859	28.1120	0.0000	V			9.691	213465	0.703	0.000	1.680	1.019	0.0000	0.0000
22	61.291	60.583	61.400	18812743	816833	23.0310	0.0000	V			9.877	9715	15.440	0.000	0.696	1.019	0.0000	0.0000
23	61.563	61.400	62.767	42403390	872696	48.5890	0.0000	V			9.925	12747	11.767	0.000	0.117	1.005	0.0000	0.0000
24	62.984	62.767	63.300	3542278	180190	19.6590	0.0000	V			10.177	245164	0.612	0.000	1.056	1.025	0.0000	0.0000
25	63.541	63.300	63.983	3356330	115626	29.0270	0.0000	V			10.276	23582	6.361	0.000	0.515	1.010	0.0000	0.0000
26	64.248	63.983	64.433	2737059	144765	18.9070	0.0000	V			10.402	198993	0.754	0.000	0.633	1.012	0.0000	0.0000
27	64.621	64.433	65.117	3434573	128712	26.6840	0.0000	V			10.468	143283	1.047	0.000	0.593	1.006	0.0000	0.0000
28	65.350	65.117	65.433	1368886	84550	16.1900	0.0000	V			10.597	3906	38.406	0.000	0.300	1.012	0.0000	0.0000
29	66.058	65.433	66.200	10570451	428653	24.6600	0.0000	V			10.723	128940	1.163	0.000	0.288	1.012	0.0000	0.0000
30	66.322	66.200	66.683	7870456	417788	18.8380	0.0000	V			10.770	98016	1.530	0.000	0.334	1.004	0.0000	0.0000
31	66.877	66.683	67.033	2569138	147486	17.4200	0.0000	V			10.868	111420	1.346	0.000	0.673	1.009	0.0000	0.0000
32	67.338	67.033	67.467	5377988	269887	19.9270	0.0000	V			10.950	36455	4.115	0.000	0.417	1.008	0.0000	0.0000
33	67.700	67.467	67.900	11282847	573697	19.6670	0.0000	V			11.014	141039	1.064	0.000	0.339	1.006	0.0000	0.0000
34	68.073	67.900	68.583	16380139	654051	25.0440	0.0000	V			11.080	128267	1.169	0.000	0.504	1.006	0.0000	0.0000
35	68.920	68.583	69.017	4770798	228726	20.8580	0.0000	V			11.231	16923	8.864	0.000	0.589	1.014	0.0000	0.0000
36	69.191	69.017	69.917	9902762	411148	24.0860	0.0000	V			11.279	226695	0.662	0.000	0.200	1.004	0.0000	0.0000
37	70.903	69.917	71.183	15336888	410956	37.3200	0.0000	V			11.583	182265	0.823	0.000	2.749	1.027	0.0000	0.0000
38	71.319	71.183	71.600	4590177	253520	18.1060	0.0000	V			11.656	197597	0.759	0.000	0.637	1.006	0.0000	0.0000
39	71.731	71.600	71.867	1782871	118309	15.0700	0.0000	V			11.730	31208	4.806	0.000	0.363	1.006	0.0000	0.0000
40	72.146	71.867	72.667	6370325	229268	27.7850	0.0000	V			11.803	205329	0.731	0.000	0.367	1.006	0.0000	0.0000
41	72.761	72.667	72.883	904348	71294	12.6850	0.0000	V			11.912	7275	20.618	0.000	0.304	1.009	0.0000	0.0000
42	73.048	72.883	73.217	1430645	74885	19.1050	0.0000	V			11.963	14838	10.109	0.000	0.099	1.004	0.0000	0.0000
43	73.420	73.217	73.650	2241267	111418	20.1160	0.0000	V			12.029	174178	0.861	0.000	0.239	1.006	0.0000	0.0000
44	73.806	73.650	74.117	1928327	94036	20.5060	0.0000	V			12.098	182287	0.823	0.000	0.553	1.006	0.0000	0.0000
45	74.940	74.117	75.150	9824717	311592	31.5310	0.0000	V			12.299	69874	2.147	0.000	1.242	1.017	0.0000	0.0000
46	75.227	75.150	75.417	2686999	193535	13.8840	0.0000	V			12.350	39144	3.832	0.000	0.216	1.004	0.0000	0.0000
47	75.609	75.417	75.817	4971145	284388	17.4800	0.0000	V			12.418	295313	0.508	0.000	0.368	1.005	0.0000	0.0000
48	75.911	75.817	76.167	3241138	168877	19.1920	0.0000	V			12.471	21143	7.094	0.000	0.229	1.004	0.0000	0.0000
49	76.326	76.167	76.550	3361316	189025	17.7820	0.0000	V			12.545	185573	0.808	0.000	0.296	1.006	0.0000	0.0000
50	76.678	76.550	77.467	2961850	116683	25.3840	0.0000	V			12.607	208885	0.718	0.000	0.511	1.005	0.0000	0.0000
51	79.475	78.467	79.833	4184684	88455	47.3090	0.0000	V			13.104	29821	5.030	0.000	2.227	1.039	0.0000	0.0000
52	80.179	79.833	80.417	2841407	93385	30.4270	0.0000	V			13.229	12369	12.127	0.000	0.298	1.010	0.0000	0.0000
53	80.583	80.417	80.900	1952582	109772	17.7880	0.0000	V			13.300	373906	0.401	0.000	0.237	1.005	0.0000	0.0000
54	80.950	80.900	81.650	882038	28457	30.9960	0.0000	V			13.366	1203	124.670	0.000	0.074	1.005	0.0000	0.0000
55	83.172	82.583	83.400	940684	27185	34.6030	0.0000	V			13.760	63416	2.365	0.000	0.417	1.030	0.0000	0.0000
56	90.867	90.350	92.167	1068242	18656	57.2590	0.0000	V			15.126	47312	3.170	0.000	5.144	1.099	0.0000	0.0000
57	128.992	128.167	129.450	751063	12188	61.6210	0.0000	V			21.891	4578	32.763	0.000	8.202	1.447	0.0000	0.0000
58	131.645	131.133	132.333	827493	14967	55.2890	0.0000	V			22.362	45652	3.286	0.000	0.526	1.022	0.0000	0.0000
59	135.059	133.817	136.017	1635044	14313	114.2380	0.0000	V			22.968	11582	12.952	0.000	0.912	1.027	0.0000	0.0000
60	137.131	136.017	137.767	1493262	20894	71.4690	0.0000	V			23.336	7903	18.980	0.000	0.370	1.016	0.0000	0.0000
61	143.219	142.733	143.767	801847	15761	50.8740	0.0000	V			24.416	82818	1.811	0.000	1.492	1.046	0.0000	0.0000
62	144.269	143.767	145.067	792487	12118	65.3960	0.0000	V			24.602	14901	10.067	0.000	0.312	1.008	0.0000	0.0000
63	146.460	145.067	148.183	3226131	25069	128.6890	0.0000	V			24.991	18552	8.086	0.000	0.485	1.016	0.0000	0.0000
64	148.691	148.183	149.400	819927	12063	67.9720	0.0000	V			25.387	1221	122.852	0.000	0.209	1.016	0.0000	0.0000
[Peak Table(PDA-Ch1)]
# of Peaks	0
Width	10	sec
Slope	1000	uV/min
Drift	0	uV/min
T.DBL	1000	min
Min area	750000	counts

## Sheet: Helix30-4
[Header]
Application Name	LCsolution
Version	1.25
Output Date	2016-02-27
Output Time	11:09:10
[Configuration]
# of Detectors	1
Detector ID	Detector A
Detector Name	Detector A
# of Channels	1
[Peak Table(Detector A-Ch1)]
# of Peaks	92
Peak#	R.Time	I.Time	F.Time	Area	Height	A/H	Conc.	Mark	ID#	Name	k'	Plate #	Plate Ht.	Tailing	Resolution	Sep.Factor	Conc. %	Norm Conc.
1	5.633	5.500	6.267	12944067	1341039	9.6520	0.0000				0.000	9589	15.642	2.462	0.000	0.000	0.0000	0.0000
2	6.820	6.450	7.000	9540059	614132	15.5340	0.0000				0.211	6459	23.224	0.000	4.169	0.000	0.0000	0.0000
3	7.140	7.000	8.017	6374886	311761	20.4480	0.0000	V			0.268	2545	58.946	0.000	0.706	1.269	0.0000	0.0000
4	9.500	8.483	9.800	5060566	61607	82.1430	0.0000				0.686	146	1030.563	0.000	1.270	2.566	0.0000	0.0000
5	10.808	9.800	11.750	3172803	26683	118.9070	0.0000	V			0.919	0	0.000	0.000	0.000	1.338	0.0000	0.0000
6	33.294	31.950	33.650	9572167	310098	30.8680	0.0000	V			4.910	42185	3.556	0.000	0.000	5.345	0.0000	0.0000
7	33.856	33.650	39.200	5989756	256622	23.3410	0.0000	SV			5.010	80615	1.861	0.000	0.999	1.020	0.0000	0.0000
8	40.061	39.200	42.283	50613876	891186	56.7940	0.0000	SV			6.112	13091	11.458	1.262	6.609	1.220	0.0000	0.0000
9	43.537	42.283	44.200	13126302	462226	28.3980	0.0000	V			6.729	81154	1.848	0.791	3.456	1.101	0.0000	0.0000
10	44.958	44.200	45.133	789932	28684	27.5390	0.0000	V			6.981	51140	2.933	0.000	2.020	1.037	0.0000	0.0000
11	45.656	45.133	46.050	1956618	99435	19.6770	0.0000	V			7.105	217729	0.689	0.000	1.177	1.018	0.0000	0.0000
12	49.131	48.217	49.367	2050825	68104	30.1130	0.0000	V			7.722	69000	2.174	0.000	6.098	1.087	0.0000	0.0000
13	50.348	49.367	52.117	47111442	774038	60.8640	0.0000	SV			7.938	16972	8.838	1.027	1.061	1.028	0.0000	0.0000
14	53.281	52.117	53.733	11194228	438407	25.5340	0.0000	V			8.458	206864	0.725	0.000	2.912	1.066	0.0000	0.0000
15	53.920	53.733	54.100	1444915	86539	16.6970	0.0000	V			8.572	139830	1.073	0.000	1.224	1.013	0.0000	0.0000
16	54.882	54.100	55.600	35379020	889134	39.7900	0.0000	V			8.743	68282	2.197	0.000	1.358	1.020	0.0000	0.0000
17	56.469	55.600	56.867	14771702	581164	25.4170	0.0000	V			9.024	186843	0.803	0.000	2.328	1.032	0.0000	0.0000
18	57.009	56.867	57.267	1393979	71124	19.5990	0.0000	V			9.120	66143	2.268	0.000	0.767	1.011	0.0000	0.0000
19	57.652	57.267	57.833	1664421	55959	29.7440	0.0000	V			9.234	6846	21.911	0.000	0.350	1.013	0.0000	0.0000
20	57.960	57.833	58.150	885541	55796	15.8710	0.0000	V			9.289	76399	1.963	0.000	0.170	1.006	0.0000	0.0000
21	58.516	58.367	58.650	766252	50385	15.2080	0.0000	V			9.388	55654	2.695	0.000	0.608	1.011	0.0000	0.0000
22	59.190	58.650	59.500	3924585	129268	30.3600	0.0000	V			9.507	107089	1.401	0.000	0.786	1.013	0.0000	0.0000
23	60.216	59.500	60.567	9316412	327980	28.4050	0.0000	V			9.690	211993	0.708	0.000	1.646	1.019	0.0000	0.0000
24	61.279	60.567	61.367	17867537	812697	21.9850	0.0000	V			9.878	6412	23.395	0.000	0.593	1.019	0.0000	0.0000
25	61.540	61.367	62.750	43476071	875538	49.6560	0.0000	V			9.925	12058	12.440	0.000	0.098	1.005	0.0000	0.0000
26	62.962	62.750	63.283	3724446	191921	19.4060	0.0000	V			10.177	250677	0.598	0.000	1.036	1.025	0.0000	0.0000
27	63.523	63.283	63.967	3442959	118431	29.0720	0.0000	V			10.277	21059	7.123	0.000	0.497	1.010	0.0000	0.0000
28	64.247	63.967	64.433	2867693	146167	19.6190	0.0000	V			10.405	185984	0.807	0.000	0.617	1.013	0.0000	0.0000
29	64.616	64.433	65.100	3431713	122685	27.9720	0.0000	V			10.471	47653	3.148	0.000	0.415	1.006	0.0000	0.0000
30	66.056	65.100	66.200	11851822	417561	28.3830	0.0000	V			10.726	131205	1.143	0.000	1.505	1.024	0.0000	0.0000
31	66.321	66.200	66.667	7522352	403522	18.6420	0.0000	V			10.773	95013	1.579	0.000	0.333	1.004	0.0000	0.0000
32	66.861	66.667	67.017	2795717	159614	17.5150	0.0000	V			10.869	106132	1.413	0.000	0.642	1.009	0.0000	0.0000
33	67.329	67.017	67.433	5566193	291764	19.0780	0.0000	V			10.952	18206	8.239	0.000	0.333	1.008	0.0000	0.0000
34	67.665	67.433	67.867	12352137	614116	20.1140	0.0000	V			11.012	121964	1.230	0.000	0.243	1.005	0.0000	0.0000
35	68.025	67.867	68.567	18070733	701376	25.7650	0.0000	V			11.076	111083	1.350	0.000	0.452	1.006	0.0000	0.0000
36	68.929	68.567	69.017	4848256	227186	21.3400	0.0000	V			11.236	12012	12.487	0.000	0.543	1.014	0.0000	0.0000
37	69.194	69.017	69.900	9836701	403188	24.3970	0.0000	V			11.283	221127	0.678	0.000	0.171	1.004	0.0000	0.0000
38	70.895	69.900	71.183	16289078	429500	37.9260	0.0000	V			11.585	175668	0.854	0.000	2.690	1.027	0.0000	0.0000
39	71.312	71.183	71.617	4877996	262543	18.5800	0.0000	V			11.659	186497	0.804	0.000	0.623	1.006	0.0000	0.0000
40	71.730	71.617	71.867	1688904	117775	14.3400	0.0000	V			11.734	18373	8.164	0.000	0.301	1.006	0.0000	0.0000
41	72.157	71.867	72.650	6240537	226994	27.4920	0.0000	V			11.809	214131	0.701	0.000	0.312	1.006	0.0000	0.0000
42	72.765	72.650	72.883	1048943	77324	13.5660	0.0000	V			11.917	11849	12.659	0.000	0.368	1.009	0.0000	0.0000
43	73.040	72.883	73.217	1557519	82107	18.9690	0.0000	V			11.966	18184	8.249	0.000	0.114	1.004	0.0000	0.0000
44	73.418	73.217	73.650	2444266	120381	20.3040	0.0000	V			12.033	164026	0.914	0.000	0.262	1.006	0.0000	0.0000
45	73.803	73.650	74.100	2045332	102920	19.8730	0.0000	V			12.102	189115	0.793	0.000	0.549	1.006	0.0000	0.0000
46	74.931	74.100	75.133	10840488	340114	31.8730	0.0000	V			12.302	66408	2.259	0.000	1.224	1.017	0.0000	0.0000
47	75.218	75.133	75.417	3376092	231494	14.5840	0.0000	V			12.353	52245	2.871	0.000	0.232	1.004	0.0000	0.0000
48	75.597	75.417	75.817	5805733	334223	17.3710	0.0000	V			12.420	307754	0.487	0.000	0.407	1.005	0.0000	0.0000
49	75.918	75.817	76.183	3649680	183022	19.9410	0.0000	V			12.477	20831	7.201	0.000	0.242	1.005	0.0000	0.0000
50	76.338	76.183	76.567	3428252	194133	17.6590	0.0000	V			12.551	187372	0.801	0.000	0.299	1.006	0.0000	0.0000
51	76.690	76.567	76.983	2061926	118151	17.4520	0.0000	V			12.614	209263	0.717	0.000	0.512	1.005	0.0000	0.0000
52	77.058	76.983	77.483	1106597	45091	24.5420	0.0000	V			12.679	9518	15.759	0.000	0.192	1.005	0.0000	0.0000
53	79.501	78.483	79.583	3476785	95761	36.3070	0.0000	V			13.113	3626	41.372	0.000	0.579	1.034	0.0000	0.0000
54	79.642	79.583	79.850	1437056	96096	14.9540	0.0000	V			13.138	5342	28.081	0.000	0.029	1.002	0.0000	0.0000
55	80.191	79.850	80.433	3227490	105754	30.5190	0.0000	V			13.235	39190	3.827	0.000	0.184	1.007	0.0000	0.0000
56	80.589	80.433	81.100	2539626	123077	20.6340	0.0000	V			13.306	342666	0.438	0.000	0.367	1.005	0.0000	0.0000
57	83.188	82.600	83.417	1220333	34448	35.4250	0.0000	V			13.767	62199	2.412	0.000	2.757	1.035	0.0000	0.0000
58	84.419	84.300	84.983	806414	29159	27.6560	0.0000	V			13.986	35783	4.192	0.000	0.789	1.016	0.0000	0.0000
59	89.796	88.917	90.217	1011322	16205	62.4060	0.0000	V			14.941	26875	5.581	0.000	2.705	1.068	0.0000	0.0000
60	90.604	90.217	91.917	1222518	18844	64.8770	0.0000	V			15.084	36605	4.098	0.000	0.396	1.010	0.0000	0.0000
61	116.897	116.533	118.033	1124776	15426	72.9120	0.0000	V			19.751	2315	64.799	0.000	4.528	1.309	0.0000	0.0000
62	118.958	118.033	120.283	2034080	20944	97.1200	0.0000	V			20.117	7727	19.412	0.000	0.273	1.019	0.0000	0.0000
63	123.303	122.700	123.733	1266314	22808	55.5200	0.0000	V			20.889	994	150.883	0.000	0.413	1.038	0.0000	0.0000
64	124.108	123.733	124.617	1257765	25525	49.2760	0.0000	V			21.032	14994	10.004	0.000	0.082	1.007	0.0000	0.0000
65	125.140	124.617	125.983	2004361	27127	73.8870	0.0000	V			21.215	6487	23.125	0.000	0.201	1.009	0.0000	0.0000
66	126.845	125.983	127.117	1906145	33705	56.5530	0.0000	V			21.517	2058	72.880	0.000	0.196	1.014	0.0000	0.0000
67	127.498	127.117	128.600	2847391	35442	80.3400	0.0000	V			21.633	3368	44.540	0.000	0.065	1.005	0.0000	0.0000
68	128.986	128.600	129.300	1246325	30976	40.2360	0.0000	V			21.898	5926	25.314	0.000	0.192	1.012	0.0000	0.0000
69	129.544	129.300	129.800	913715	30800	29.6660	0.0000	V			21.997	648	231.573	0.000	0.041	1.005	0.0000	0.0000
70	130.615	129.800	130.883	2137879	34218	62.4790	0.0000	V			22.187	792	189.479	0.000	0.055	1.009	0.0000	0.0000
71	131.482	130.883	132.100	2862628	42650	67.1180	0.0000	V			22.341	105	1435.253	0.000	0.025	1.007	0.0000	0.0000
72	132.626	132.100	133.233	2812311	43784	64.2310	0.0000	V			22.544	6316	23.748	0.000	0.039	1.009	0.0000	0.0000
73	133.450	133.233	133.567	779003	39101	19.9230	0.0000	V			22.690	0	0.000	0.000	0.000	1.006	0.0000	0.0000
74	134.458	133.567	134.800	3310217	47858	69.1670	0.0000	V			22.869	2572	58.311	0.000	0.000	1.008	0.0000	0.0000
75	135.044	134.800	136.067	3486436	47283	73.7360	0.0000	V			22.973	487	308.023	0.000	0.033	1.005	0.0000	0.0000
76	136.200	136.067	136.467	1054511	44303	23.8020	0.0000	V			23.178	266	564.942	0.000	0.040	1.009	0.0000	0.0000
77	136.968	136.467	137.533	3057091	52093	58.6850	0.0000	V			23.314	16665	9.001	0.000	0.041	1.006	0.0000	0.0000
78	137.888	137.533	138.417	2411990	47681	50.5860	0.0000	V			23.478	7327	20.472	0.000	0.172	1.007	0.0000	0.0000
79	138.974	138.417	139.367	2666393	48853	54.5800	0.0000	V			23.671	3922	38.245	0.000	0.142	1.008	0.0000	0.0000
80	139.585	139.367	140.333	2737641	47441	57.7070	0.0000	V			23.779	320	469.093	0.000	0.030	1.005	0.0000	0.0000
81	140.693	140.333	141.167	2373852	48264	49.1840	0.0000	V			23.976	640	234.441	0.000	0.041	1.008	0.0000	0.0000
82	142.180	141.167	142.467	3958850	53930	73.4070	0.0000	V			24.240	894	167.801	0.000	0.072	1.011	0.0000	0.0000
83	143.091	142.467	143.867	4837450	62172	77.8070	0.0000	V			24.401	9176	16.348	0.000	0.073	1.007	0.0000	0.0000
84	144.100	143.867	144.500	2064316	54838	37.6440	0.0000	V			24.581	343	437.926	0.000	0.054	1.007	0.0000	0.0000
85	145.694	144.500	146.567	7969077	71774	111.0300	0.0000	V			24.864	1255	119.560	0.000	0.067	1.012	0.0000	0.0000
86	147.012	146.567	148.183	6099239	66276	92.0280	0.0000	V			25.097	2276	65.891	0.000	0.092	1.009	0.0000	0.0000
87	148.384	148.183	149.317	3968195	59407	66.7960	0.0000	V			25.341	83	1816.044	0.000	0.035	1.010	0.0000	0.0000
88	149.591	149.317	150.000	2353714	58009	40.5750	0.0000	V			25.555	628	238.712	0.000	0.027	1.008	0.0000	0.0000
89	151.275	150.000	152.017	7300802	65697	111.1290	0.0000	V			25.854	1154	130.002	0.000	0.081	1.012	0.0000	0.0000
90	152.458	152.017	154.633	9089214	60015	151.4480	0.0000	V			26.064	25	6108.797	0.000	0.017	1.008	0.0000	0.0000
91	155.283	154.633	155.733	3754767	57415	65.3970	0.0000	V			26.566	4	35884.153	0.000	0.013	1.019	0.0000	0.0000
92	156.144	155.733	159.933	10334831	59310	174.2500	0.0000	V			26.719	2309	64.969	0.000	0.005	1.006	0.0000	0.0000
[Peak Table(PDA-Ch1)]
# of Peaks	0
Width	10	sec
Slope	1000	uV/min
Drift	0	uV/min
T.DBL	1000	min
Min area	750000	counts

## Sheet: Helix30-6
[Header]
Application Name	LCsolution
Version	1.25
Output Date	2016-02-27
Output Time	11:10:04
[Configuration]
# of Detectors	1
Detector ID	Detector A
Detector Name	Detector A
# of Channels	1
[Peak Table(Detector A-Ch1)]
# of Peaks	64
Peak#	R.Time	I.Time	F.Time	Area	Height	A/H	Conc.	Mark	ID#	Name	k'	Plate #	Plate Ht.	Tailing	Resolution	Sep.Factor	Conc. %	Norm Conc.
1	5.617	5.483	6.467	12013740	1339800	8.9670	0.0000	S			0.000	10772	13.925	1.671	0.000	0.000	0.0000	0.0000
2	6.805	6.467	7.000	9126989	614408	14.8550	0.0000				0.212	6617	22.670	0.000	4.314	0.000	0.0000	0.0000
3	7.148	7.000	8.000	6323139	310151	20.3870	0.0000	V			0.273	2587	57.973	0.000	0.765	1.289	0.0000	0.0000
4	9.450	8.533	9.833	5197890	67390	77.1320	0.0000				0.683	109	1373.741	0.000	1.101	2.502	0.0000	0.0000
5	10.895	9.833	12.133	4077000	32450	125.6400	0.0000	V			0.940	0	0.000	0.000	0.000	1.377	0.0000	0.0000
6	33.297	31.850	33.650	9703436	299222	32.4290	0.0000	V			4.928	39874	3.762	0.000	0.000	5.244	0.0000	0.0000
7	33.863	33.650	39.183	5905316	251062	23.5210	0.0000	SV			5.029	79710	1.882	0.000	0.988	1.020	0.0000	0.0000
8	40.052	39.183	42.267	50032186	887900	56.3490	0.0000	SV			6.131	13348	11.238	1.249	6.632	1.219	0.0000	0.0000
9	43.523	42.267	44.183	13032439	459927	28.3360	0.0000	V			6.749	81495	1.841	0.789	3.477	1.101	0.0000	0.0000
10	44.963	44.183	45.233	938810	29461	31.8660	0.0000	V			7.005	51758	2.898	0.000	2.057	1.038	0.0000	0.0000
11	45.663	45.233	46.050	1853131	100516	18.4360	0.0000	V			7.130	216468	0.693	0.000	1.183	1.018	0.0000	0.0000
12	49.091	48.183	49.333	2012975	67620	29.7690	0.0000	V			7.740	78011	1.923	0.000	6.257	1.086	0.0000	0.0000
13	50.325	49.333	52.117	47471512	774059	61.3280	0.0000	SV			7.960	16554	9.061	1.036	1.088	1.028	0.0000	0.0000
14	53.284	52.117	53.717	10968907	433004	25.3320	0.0000	V			8.487	211030	0.711	0.000	2.918	1.066	0.0000	0.0000
15	53.907	53.717	54.100	1497949	87437	17.1320	0.0000	V			8.598	145110	1.034	0.000	1.209	1.013	0.0000	0.0000
16	54.885	54.100	55.600	34797146	884001	39.3630	0.0000	V			8.772	70704	2.122	0.000	1.405	1.020	0.0000	0.0000
17	56.460	55.600	56.867	14726664	580186	25.3830	0.0000	V			9.052	189484	0.792	0.000	2.343	1.032	0.0000	0.0000
18	56.999	56.867	57.250	1382443	73413	18.8310	0.0000	V			9.148	69542	2.157	0.000	0.780	1.011	0.0000	0.0000
19	57.660	57.483	57.817	1031999	57344	17.9970	0.0000	V			9.266	38108	3.936	0.000	0.646	1.013	0.0000	0.0000
20	57.942	57.817	58.133	890950	56027	15.9020	0.0000	V			9.316	72132	2.080	0.000	0.275	1.005	0.0000	0.0000
21	58.497	58.350	58.633	787214	51478	15.2920	0.0000	V			9.415	50438	2.974	0.000	0.583	1.011	0.0000	0.0000
22	59.163	58.633	59.467	3883730	126172	30.7810	0.0000	V			9.534	96359	1.557	0.000	0.739	1.013	0.0000	0.0000
23	60.189	59.467	60.550	9337261	328785	28.3990	0.0000	V			9.716	213348	0.703	0.000	1.598	1.019	0.0000	0.0000
24	61.254	60.550	61.333	17380889	808222	21.5050	0.0000	V			9.906	5978	25.094	0.000	0.577	1.020	0.0000	0.0000
25	61.511	61.333	62.717	43506591	873529	49.8060	0.0000	V			9.952	12316	12.179	0.000	0.095	1.005	0.0000	0.0000
26	62.925	62.717	63.250	3720761	192974	19.2810	0.0000	V			10.203	254511	0.589	0.000	1.041	1.025	0.0000	0.0000
27	63.482	63.250	63.933	3452920	118567	29.1220	0.0000	V			10.303	17821	8.417	0.000	0.465	1.010	0.0000	0.0000
28	64.216	63.933	64.400	2885892	145774	19.7970	0.0000	V			10.433	177973	0.843	0.000	0.584	1.013	0.0000	0.0000
29	64.580	64.400	65.067	3473707	121141	28.6750	0.0000	V			10.498	46266	3.242	0.000	0.403	1.006	0.0000	0.0000
30	66.019	65.067	66.150	11385657	409586	27.7980	0.0000	V			10.754	130980	1.145	0.000	1.491	1.024	0.0000	0.0000
31	66.282	66.150	66.617	7517778	393821	19.0890	0.0000	V			10.801	94954	1.580	0.000	0.332	1.004	0.0000	0.0000
32	66.816	66.617	66.967	2793578	159149	17.5530	0.0000	V			10.896	100187	1.497	0.000	0.626	1.009	0.0000	0.0000
33	67.293	66.967	67.383	5536008	295549	18.7310	0.0000	V			10.981	14060	10.669	0.000	0.307	1.008	0.0000	0.0000
34	67.621	67.383	67.817	12416622	618381	20.0790	0.0000	V			11.039	119965	1.250	0.000	0.215	1.005	0.0000	0.0000
35	67.974	67.817	68.517	18179492	705638	25.7630	0.0000	V			11.102	110763	1.354	0.000	0.442	1.006	0.0000	0.0000
36	68.885	68.517	68.967	4813352	226257	21.2740	0.0000	V			11.265	12721	11.792	0.000	0.559	1.015	0.0000	0.0000
37	69.149	68.967	69.850	9780506	399488	24.4830	0.0000	V			11.311	223703	0.671	0.000	0.174	1.004	0.0000	0.0000
38	70.841	69.850	71.117	16103276	426505	37.7560	0.0000	V			11.613	171331	0.875	0.000	2.667	1.027	0.0000	0.0000
39	71.257	71.117	71.583	5104526	259859	19.6430	0.0000	V			11.687	180368	0.832	0.000	0.614	1.006	0.0000	0.0000
40	71.685	71.583	71.817	1525797	113349	13.4610	0.0000	V			11.763	15222	9.854	0.000	0.286	1.007	0.0000	0.0000
41	72.111	71.817	72.600	6102655	223441	27.3120	0.0000	V			11.839	226497	0.662	0.000	0.291	1.006	0.0000	0.0000
42	72.713	72.600	72.833	1050755	77532	13.5530	0.0000	V			11.946	12377	12.119	0.000	0.374	1.009	0.0000	0.0000
43	72.986	72.833	73.167	1551352	82164	18.8810	0.0000	V			11.995	20603	7.280	0.000	0.117	1.004	0.0000	0.0000
44	73.371	73.167	73.600	2455458	121192	20.2610	0.0000	V			12.063	165799	0.905	0.000	0.280	1.006	0.0000	0.0000
45	73.758	73.600	74.033	2004732	104265	19.2270	0.0000	V			12.132	201479	0.744	0.000	0.561	1.006	0.0000	0.0000
46	74.885	74.033	75.083	10960932	341691	32.0790	0.0000	V			12.333	65476	2.291	0.000	1.234	1.017	0.0000	0.0000
47	75.172	75.083	75.367	3454002	235212	14.6850	0.0000	V			12.384	50514	2.969	0.000	0.229	1.004	0.0000	0.0000
48	75.549	75.367	75.783	6025788	338644	17.7940	0.0000	V			12.451	312887	0.479	0.000	0.402	1.005	0.0000	0.0000
49	75.878	75.783	76.133	3407039	178739	19.0620	0.0000	V			12.509	22662	6.619	0.000	0.257	1.005	0.0000	0.0000
50	76.298	76.133	76.517	3368975	189787	17.7510	0.0000	V			12.584	195176	0.769	0.000	0.311	1.006	0.0000	0.0000
51	76.651	76.517	76.933	2069946	116201	17.8140	0.0000	V			12.647	212341	0.706	0.000	0.520	1.005	0.0000	0.0000
52	77.027	76.933	77.433	1164125	47094	24.7190	0.0000	V			12.714	14347	10.455	0.000	0.232	1.005	0.0000	0.0000
53	79.483	78.450	79.533	3408986	96296	35.4010	0.0000	V			13.151	1777	84.395	0.000	0.486	1.034	0.0000	0.0000
54	79.588	79.533	79.800	1436884	96702	14.8590	0.0000	V			13.170	2709	55.369	0.000	0.015	1.001	0.0000	0.0000
55	80.157	79.800	80.383	3202266	104320	30.6970	0.0000	V			13.271	32920	4.556	0.000	0.144	1.008	0.0000	0.0000
56	80.547	80.383	81.067	2576004	121906	21.1310	0.0000	V			13.341	330146	0.454	0.000	0.335	1.005	0.0000	0.0000
57	83.142	82.533	83.383	1325319	34913	37.9610	0.0000	V			13.803	59003	2.542	0.000	2.689	1.035	0.0000	0.0000
58	83.877	83.700	84.267	1022908	34610	29.5550	0.0000	V			13.934	17379	8.631	0.000	0.376	1.009	0.0000	0.0000
59	84.383	84.267	84.950	755816	28280	26.7260	0.0000	V			14.024	44246	3.390	0.000	0.244	1.006	0.0000	0.0000
60	90.425	89.950	91.767	1289587	17728	72.7420	0.0000	V			15.099	23847	6.290	0.000	3.061	1.077	0.0000	0.0000
61	142.761	142.217	143.617	1127854	16185	69.6850	0.0000	V			24.417	45956	3.264	0.000	20.909	1.617	0.0000	0.0000
62	145.187	144.150	146.367	2285594	22680	100.7770	0.0000	V			24.849	31625	4.743	0.000	0.818	1.018	0.0000	0.0000
63	146.925	146.367	148.567	1763949	19089	92.4080	0.0000	V			25.159	30553	4.910	0.000	0.525	1.012	0.0000	0.0000
64	151.095	150.033	151.800	1041692	13705	76.0070	0.0000	V			25.901	3412	43.962	0.000	0.608	1.030	0.0000	0.0000
[Peak Table(PDA-Ch1)]
# of Peaks	0
Width	10	sec
Slope	1000	uV/min
Drift	0	uV/min
T.DBL	1000	min
Min area	750000	counts

[truncated: 1 more sheets: Helix30-8]
