# Supplementary material for: Defective lytic transglycosylase disrupts cell morphogenesis by hindering cell wall de-O-acetylation in Neisseria meningitidis
Source: eLife. 2020 Feb 5;9:e51247. doi: 10.7554/eLife.51247 (PMC7083599; doi:10.7554/eLife.51247)
Supplement: Figure 5—source data 1. [file elife-51247-fig5-data1.xlsx]

## Sheet: Figure 5b
Retention time (min)	LtgA +PG	ApeI +LtgA +PG	ApeI	LtgA	PG no Enzyme
0	474819	356126	237403	118716	10003
0.00833	474819	356126	237403	118716	10003
0.01667	474817	356117	237408	118706	10002
0.025	474816	356110	237410	118706	9998
0.03333	474815	356107	237410	118705	9997
0.04167	474815	356106	237411	118705	9996
0.05	474814	356109	237412	118703	9993
0.05833	474813	356109	237414	118700	9993
0.06667	474814	356110	237413	118701	9995
0.075	474813	356111	237414	118704	9998
0.08333	474814	356109	237414	118705	9995
0.09167	474813	356107	237415	118704	9988
0.1	474815	356106	237416	118705	9987
0.10833	474816	356107	237415	118704	9990
0.11667	474816	356107	237415	118704	9995
0.125	474818	356107	237417	118707	9998
0.13333	474821	356108	237418	118711	9999
0.14167	474824	356107	237419	118713	9996
0.15	474825	356105	237419	118714	9995
0.15833	474823	356104	237419	118713	9992
0.16667	474821	356105	237417	118713	9991
0.175	474821	356107	237415	118712	9994
0.18333	474824	356108	237415	118710	9994
0.19167	474825	356106	237415	118711	9995
0.2	474823	356104	237414	118713	9995
0.20833	474819	356104	237413	118715	9996
0.21667	474813	356105	237412	118718	9996
0.225	474810	356105	237411	118721	9996
0.23333	474811	356105	237411	118721	9996
0.24167	474811	356103	237414	118721	9999
0.25	474815	356103	237417	118723	10001
0.25833	474821	356105	237418	118725	9997
0.26667	474824	356107	237419	118726	9994
0.275	474823	356109	237421	118727	9992
0.28333	474824	356112	237422	118730	9993
0.29167	474825	356116	237421	118731	9993
0.3	474820	356117	237422	118733	9991
0.30833	474816	356115	237421	118733	9992
0.31667	474813	356113	237419	118732	9995
0.325	474812	356111	237418	118734	9993
0.33333	474812	356110	237419	118738	9992
0.34167	474812	356110	237420	118743	9991
0.35	474812	356110	237421	118743	9992
0.35833	474815	356112	237419	118740	9992
0.36667	474818	356113	237418	118743	9992
0.375	474821	356113	237420	118744	9990
0.38333	474822	356113	237420	118747	9989
0.39167	474822	356114	237421	118753	9988
0.4	474820	356112	237420	118757	9987
0.40833	474820	356111	237420	118760	9987
0.41667	474818	356107	237421	118761	9991
0.425	474814	356106	237421	118762	9996
0.43333	474811	356105	237420	118761	9996
0.44167	474810	356105	237423	118760	9995
0.45	474809	356107	237423	118762	9993
0.45833	474809	356109	237422	118762	9992
0.46667	474812	356112	237421	118761	9993
0.475	474815	356112	237420	118762	9992
0.48333	474815	356109	237421	118761	9994
0.49167	474816	356107	237422	118763	9995
0.5	474817	356107	237422	118765	9993
0.50833	474817	356109	237421	118763	9992
0.51667	474816	356112	237419	118760	9994
0.525	474816	356114	237418	118761	9995
0.53333	474817	356115	237418	118761	9997
0.54167	474817	356113	237415	118760	9998
0.55	474816	356108	237415	118761	9998
0.55833	474815	356104	237419	118763	9997
0.56667	474812	356105	237421	118767	10000
0.575	474809	356105	237420	118770	10001
0.58333	474809	356107	237419	118772	9999
0.59167	474810	356109	237421	118774	9999
0.6	474811	356111	237422	118773	9999
0.60833	474813	356108	237424	118774	10001
0.61667	474812	356108	237423	118778	10000
0.625	474811	356108	237421	118780	9998
0.63333	474812	356105	237424	118784	9998
0.64167	474811	356104	237424	118786	9998
0.65	474810	356106	237421	118786	9998
0.65833	474809	356108	237418	118784	9998
0.66667	474809	356110	237419	118781	9996
0.675	474809	356112	237419	118780	9997
0.68333	474812	356109	237416	118778	9998
0.69167	474812	356108	237416	118775	9995
0.7	474806	356109	237419	118775	9993
0.70833	474802	356109	237419	118779	9990
0.71667	474803	356109	237418	118781	9990
0.725	474805	356110	237420	118782	9991
0.73333	474808	356109	237420	118782	9992
0.74167	474810	356108	237419	118779	9991
0.75	474809	356107	237418	118773	9993
0.75833	474808	356106	237416	118772	9994
0.76667	474807	356106	237418	118774	9995
0.775	474809	356106	237422	118776	9993
0.78333	474812	356108	237422	118774	9993
0.79167	474813	356109	237421	118772	9995
0.8	474813	356109	237419	118772	9997
0.80833	474810	356109	237420	118774	9998
0.81667	474809	356109	237420	118775	9996
0.825	474811	356109	237420	118776	9993
0.83333	474810	356108	237423	118776	9991
0.84167	474810	356109	237427	118776	9991
0.85	474810	356108	237428	118776	9991
0.85833	474809	356105	237425	118779	9991
0.86667	474809	356102	237424	118782	9992
0.875	474811	356102	237422	118783	9993
0.88333	474811	356105	237418	118784	9993
0.89167	474811	356108	237416	118782	9994
0.9	474807	356107	237414	118779	9994
0.90833	474807	356108	237412	118778	9994
0.91667	474811	356107	237413	118778	9995
0.925	474812	356107	237416	118779	9994
0.93333	474810	356109	237418	118780	9991
0.94167	474807	356108	237421	118780	9992
0.95	474807	356106	237422	118781	9994
0.95833	474809	356103	237421	118779	9995
0.96667	474812	356103	237422	118777	9995
0.975	474815	356104	237424	118774	9992
0.98333	474817	356105	237424	118774	9991
0.99167	474816	356104	237423	118771	9992
1	474815	356102	237421	118769	9993
1.00833	474816	356103	237420	118771	9995
1.01667	474819	356105	237418	118773	9996
1.025	474818	356106	237416	118772	9995
1.03333	474815	356109	237418	118772	9994
1.04167	474814	356110	237422	118775	9992
1.05	474816	356111	237424	118778	9993
1.05833	474819	356111	237424	118778	9992
1.06667	474820	356110	237424	118774	9992
1.075	474819	356108	237422	118772	9997
1.08333	474818	356109	237421	118769	9995
1.09167	474817	356107	237418	118769	9991
1.1	474816	356103	237419	118772	9988
1.10833	474815	356099	237421	118773	9987
1.11667	474813	356098	237424	118775	9989
1.125	474810	356102	237427	118778	9990
1.13333	474806	356103	237426	118780	9990
1.14167	474806	356103	237426	118776	9989
1.15	474807	356105	237424	118773	9989
1.15833	474810	356106	237423	118771	9987
1.16667	474815	356108	237422	118770	9984
1.175	474818	356107	237423	118769	9983
1.18333	474817	356108	237423	118767	9983
1.19167	474815	356110	237423	118767	9985
1.2	474816	356114	237421	118768	9986
1.20833	474818	356114	237417	118768	9989
1.21667	474820	356112	237415	118771	9990
1.225	474822	356113	237413	118775	9989
1.23333	474824	356114	237413	118775	9984
1.24167	474825	356115	237410	118773	9980
1.25	474825	356114	237409	118773	9979
1.25833	474825	356113	237411	118775	9980
1.26667	474825	356114	237419	118775	9981
1.275	474822	356117	237424	118772	9981
1.28333	474819	356118	237425	118770	9980
1.29167	474817	356116	237423	118771	9979
1.3	474820	356114	237419	118769	9979
1.30833	474823	356114	237417	118767	9981
1.31667	474825	356114	237414	118764	9986
1.325	474824	356115	237412	118760	9988
1.33333	474823	356115	237412	118756	9988
1.34167	474822	356115	237411	118757	9987
1.35	474822	356115	237410	118764	9988
1.35833	474822	356112	237412	118766	9987
1.36667	474822	356111	237412	118767	9987
1.375	474819	356110	237412	118770	9989
1.38333	474817	356111	237415	118773	9988
1.39167	474817	356113	237418	118774	9987
1.4	474819	356112	237421	118774	9987
1.40833	474821	356111	237422	118773	9988
1.41667	474823	356112	237421	118772	9985
1.425	474824	356114	237421	118769	9984
1.43333	474823	356115	237423	118768	9986
1.44167	474821	356114	237423	118769	9988
1.45	474823	356114	237420	118768	9991
1.45833	474826	356113	237418	118765	9992
1.46667	474826	356117	237416	118764	9991
1.475	474825	356117	237416	118764	9990
1.48333	474823	356115	237418	118762	9992
1.49167	474823	356115	237417	118762	9995
1.5	474826	356114	237418	118764	9994
1.50833	474828	356113	237420	118766	9991
1.51667	474827	356113	237421	118769	9990
1.525	474823	356114	237426	118771	9989
1.53333	474822	356114	237429	118773	9988
1.54167	474820	356113	237429	118773	9988
1.55	474819	356117	237427	118772	9987
1.55833	474819	356119	237427	118773	9985
1.56667	474822	356122	237427	118774	9983
1.575	474823	356124	237426	118773	9985
1.58333	474826	356127	237424	118771	9987
1.59167	474827	356127	237422	118772	9990
1.6	474828	356125	237421	118772	9993
1.60833	474831	356120	237418	118772	9988
1.61667	474829	356115	237417	118772	9983
1.625	474825	356112	237416	118770	9983
1.63333	474822	356113	237417	118766	9984
1.64167	474822	356115	237418	118764	9986
1.65	474824	356114	237416	118766	9986
1.65833	474826	356114	237414	118765	9984
1.66667	474826	356112	237415	118767	9982
1.675	474827	356111	237414	118770	9981
1.68333	474829	356110	237413	118769	9983
1.69167	474824	356111	237416	118764	9985
1.7	474821	356114	237421	118762	9986
1.70833	474820	356117	237421	118758	9986
1.71667	474819	356121	237420	118757	9986
1.725	474817	356122	237420	118757	9984
1.73333	474819	356123	237419	118759	9984
1.74167	474820	356120	237420	118761	9983
1.75	474820	356116	237419	118763	9984
1.75833	474821	356117	237417	118767	9984
1.76667	474821	356118	237417	118769	9984
1.775	474817	356118	237417	118768	9981
1.78333	474815	356118	237415	118768	9981
1.79167	474816	356117	237412	118767	9981
1.8	474819	356118	237412	118764	9982
1.80833	474822	356117	237414	118759	9985
1.81667	474824	356115	237416	118759	9984
1.825	474824	356115	237418	118762	9981
1.83333	474822	356115	237417	118763	9980
1.84167	474821	356115	237415	118763	9982
1.85	474824	356115	237417	118762	9984
1.85833	474826	356114	237421	118761	9985
1.86667	474824	356115	237422	118759	9982
1.875	474823	356116	237422	118758	9982
1.88333	474824	356117	237421	118763	9985
1.89167	474824	356118	237418	118765	9989
1.9	474827	356119	237414	118764	9991
1.90833	474827	356121	237415	118764	9992
1.91667	474826	356123	237418	118761	9993
1.925	474827	356126	237421	118760	9992
1.93333	474826	356126	237424	118761	9992
1.94167	474824	356125	237427	118765	9991
1.95	474825	356125	237425	118766	9991
1.95833	474830	356123	237425	118766	9992
1.96667	474832	356121	237425	118766	9993
1.975	474832	356121	237426	118767	9992
1.98333	474828	356120	237427	118768	9993
1.99167	474827	356120	237425	118769	9993
2	474828	356121	237424	118770	9993
2.00833	474830	356120	237427	118767	9992
2.01667	474831	356120	237430	118765	9994
2.025	474833	356120	237433	118764	9993
2.03333	474835	356121	237432	118762	9992
2.04167	474833	356122	237430	118762	9994
2.05	474834	356122	237427	118765	9994
2.05833	474838	356121	237426	118768	9993
2.06667	474837	356124	237430	118769	9993
2.075	474835	356122	237430	118769	9997
2.08333	474835	356120	237429	118767	9999
2.09167	474837	356121	237430	118768	9999
2.1	474838	356122	237433	118767	9997
2.10833	474838	356120	237436	118769	9996
2.11667	474836	356119	237438	118771	9995
2.125	474835	356119	237437	118771	9992
2.13333	474836	356121	237436	118768	9990
2.14167	474837	356123	237434	118764	9987
2.15	474838	356123	237433	118765	9986
2.15833	474839	356125	237433	118768	9987
2.16667	474839	356126	237436	118770	9988
2.175	474838	356127	237435	118771	9986
2.18333	474836	356126	237436	118770	9986
2.19167	474834	356124	237440	118772	9986
2.2	474835	356124	237439	118772	9989
2.20833	474836	356124	237434	118767	9993
2.21667	474833	356123	237431	118765	9993
2.225	474832	356123	237433	118765	9991
2.23333	474833	356125	237433	118767	9993
2.24167	474835	356124	237433	118766	9993
2.25	474835	356122	237434	118765	9991
2.25833	474832	356119	237432	118765	9992
2.26667	474832	356116	237430	118766	9992
2.275	474832	356114	237427	118770	9991
2.28333	474829	356115	237429	118773	9992
2.29167	474828	356116	237431	118774	9991
2.3	474827	356119	237432	118771	9993
2.30833	474826	356120	237435	118766	9996
2.31667	474828	356119	237436	118764	9995
2.325	474828	356118	237435	118766	9996
2.33333	474827	356120	237437	118768	9997
2.34167	474825	356121	237437	118766	10000
2.35	474825	356123	237436	118765	10001
2.35833	474825	356122	237434	118766	9999
2.36667	474826	356121	237434	118766	10000
2.375	474827	356118	237435	118766	9999
2.38333	474826	356114	237435	118768	9998
2.39167	474826	356115	237436	118769	9997
2.4	474822	356118	237436	118768	9995
2.40833	474818	356120	237437	118767	9996
2.41667	474817	356122	237435	118766	9998
2.425	474819	356122	237433	118767	10000
2.43333	474819	356121	237431	118766	10000
2.44167	474821	356118	237432	118765	9999
2.45	474823	356117	237433	118761	9999
2.45833	474823	356118	237435	118764	9997
2.46667	474823	356118	237436	118767	9996
2.475	474823	356120	237436	118769	9996
2.48333	474822	356119	237435	118766	9995
2.49167	474821	356120	237432	118766	9994
2.5	474822	356123	237431	118766	9995
2.50833	474820	356126	237433	118763	9999
2.51667	474819	356126	237435	118763	10000
2.525	474821	356125	237435	118765	9999
2.53333	474820	356123	237435	118765	9999
2.54167	474821	356120	237434	118763	10000
2.55	474821	356118	237432	118760	10000
2.55833	474821	356117	237433	118760	9999
2.56667	474821	356117	237434	118759	10000
2.575	474820	356118	237435	118758	10002
2.58333	474818	356117	237437	118757	10002
2.59167	474819	356117	237437	118755	10002
2.6	474821	356119	237436	118756	9999
2.60833	474820	356122	237436	118757	9996
2.61667	474823	356126	237433	118758	9998
2.625	474826	356130	237433	118758	9997
2.63333	474825	356133	237437	118757	9996
2.64167	474826	356132	237439	118757	9995
2.65	474828	356129	237440	118755	9995
2.65833	474826	356128	237438	118757	9996
2.66667	474825	356125	237436	118758	9999
2.675	474827	356122	237435	118759	10002
2.68333	474827	356123	237434	118757	10003
2.69167	474824	356122	237433	118755	10003
2.7	474823	356122	237432	118754	10003
2.70833	474822	356120	237433	118751	10003
2.71667	474822	356120	237433	118751	10001
2.725	474822	356122	237430	118750	10002
2.73333	474823	356123	237427	118752	10003
2.74167	474825	356124	237429	118755	10002
2.75	474827	356125	237430	118756	10003
2.75833	474829	356129	237432	118758	10004
2.76667	474829	356133	237434	118759	10003
2.775	474829	356133	237432	118761	10003
2.78333	474828	356131	237432	118759	10004
2.79167	474826	356128	237431	118760	10001
2.8	474824	356126	237432	118761	10001
2.80833	474823	356127	237434	118760	10001
2.81667	474821	356128	237433	118762	10002
2.825	474818	356129	237434	118762	10003
2.83333	474816	356130	237437	118761	10002
2.84167	474818	356131	237437	118759	9999
2.85	474819	356130	237438	118757	9996
2.85833	474820	356128	237440	118757	9994
2.86667	474824	356128	237443	118756	9994
2.875	474828	356128	237443	118754	9996
2.88333	474829	356129	237440	118753	9998
2.89167	474824	356129	237439	118753	10001
2.9	474819	356126	237439	118756	10002
2.90833	474819	356124	237438	118758	10000
2.91667	474822	356123	237436	118757	9999
2.925	474824	356128	237434	118758	10000
2.93333	474823	356132	237434	118758	10001
2.94167	474824	356134	237435	118760	10002
2.95	474823	356136	237436	118764	10003
2.95833	474823	356140	237438	118768	10002
2.96667	474822	356137	237438	118768	10001
2.975	474822	356133	237439	118767	9998
2.98333	474822	356130	237439	118767	9997
2.99167	474824	356126	237439	118767	9994
3	474826	356123	237439	118768	9994
3.00833	474831	356124	237438	118767	9996
3.01667	474830	356124	237438	118763	10002
3.025	474832	356125	237438	118761	10006
3.03333	474832	356121	237439	118762	10010
3.04167	474830	356119	237441	118763	10013
3.05	474827	356120	237443	118764	10010
3.05833	474827	356122	237444	118762	10005
3.06667	474827	356122	237443	118758	10003
3.075	474826	356120	237443	118756	10005
3.08333	474827	356119	237443	118757	10006
3.09167	474828	356120	237443	118759	10009
3.1	474830	356121	237443	118761	10008
3.10833	474831	356123	237441	118764	10004
3.11667	474832	356123	237443	118767	10000
3.125	474830	356123	237443	118767	9998
3.13333	474828	356123	237444	118766	9997
3.14167	474826	356122	237443	118763	9997
3.15	474824	356121	237441	118759	9999
3.15833	474821	356120	237443	118759	9999
3.16667	474821	356121	237444	118762	9997
3.175	474822	356121	237445	118761	9996
3.18333	474826	356123	237446	118759	9999
3.19167	474828	356123	237446	118759	10004
3.2	474829	356122	237447	118762	10006
3.20833	474826	356124	237450	118762	10006
3.21667	474825	356126	237452	118763	10005
3.225	474828	356126	237451	118761	10004
3.23333	474828	356127	237451	118759	9999
3.24167	474823	356131	237448	118758	9994
3.25	474821	356133	237443	118758	9991
3.25833	474819	356136	237441	118760	9990
3.26667	474820	356137	237440	118761	9990
3.275	474821	356135	237438	118761	9991
3.28333	474822	356131	237438	118761	9989
3.29167	474822	356127	237438	118760	9986
3.3	474819	356124	237438	118763	9986
3.30833	474819	356124	237438	118765	9988
3.31667	474820	356123	237442	118766	9990
3.325	474821	356125	237446	118765	9991
3.33333	474823	356126	237447	118764	9991
3.34167	474823	356129	237446	118764	9991
3.35	474820	356131	237444	118763	9990
3.35833	474821	356128	237445	118761	9992
3.36667	474821	356130	237448	118761	9996
3.375	474819	356132	237448	118760	9996
3.38333	474821	356134	237447	118761	9993
3.39167	474824	356136	237446	118762	9992
3.4	474826	356137	237444	118762	9993
3.40833	474825	356136	237445	118760	9995
3.41667	474825	356136	237444	118759	9997
3.425	474828	356135	237446	118760	9998
3.43333	474829	356134	237445	118761	9999
3.44167	474828	356134	237442	118763	10001
3.45	474827	356133	237438	118766	10002
3.45833	474826	356131	237436	118768	10001
3.46667	474825	356129	237437	118769	10002
3.475	474825	356127	237440	118767	10002
3.48333	474823	356125	237441	118764	9997
3.49167	474824	356125	237440	118762	9993
3.5	474827	356127	237443	118760	9992
3.50833	474829	356126	237441	118758	9993
3.51667	474830	356123	237438	118758	9993
3.525	474832	356124	237436	118760	9993
3.53333	474832	356126	237436	118762	9992
3.54167	474831	356128	237435	118764	9988
3.55	474832	356130	237435	118766	9986
3.55833	474834	356135	237436	118765	9986
3.56667	474834	356137	237438	118762	9986
3.575	474833	356136	237441	118763	9986
3.58333	474832	356135	237444	118762	9990
3.59167	474830	356135	237446	118761	9994
3.6	474829	356133	237445	118760	10000
3.60833	474829	356131	237441	118761	10002
3.61667	474830	356131	237439	118763	9999
3.625	474835	356130	237438	118764	9997
3.63333	474838	356129	237440	118766	9996
3.64167	474839	356127	237441	118767	9996
3.65	474837	356125	237442	118768	9996
3.65833	474836	356124	237441	118769	9995
3.66667	474835	356123	237441	118768	9995
3.675	474831	356122	237440	118765	9994
3.68333	474829	356121	237440	118764	9993
3.69167	474831	356118	237442	118765	9992
3.7	474832	356117	237443	118764	9988
3.70833	474835	356118	237440	118761	9989
3.71667	474837	356121	237435	118755	9993
3.725	474835	356120	237435	118753	9998
3.73333	474833	356117	237436	118756	10001
3.74167	474833	356115	237435	118759	10000
3.75	474830	356115	237436	118762	9998
3.75833	474828	356119	237437	118763	9998
3.76667	474828	356122	237434	118760	9996
3.775	474830	356122	237431	118756	9994
3.78333	474832	356120	237433	118758	9994
3.79167	474833	356118	237434	118759	9994
3.8	474836	356119	237435	118758	9994
3.80833	474836	356121	237434	118759	9998
3.81667	474835	356123	237432	118759	9998
3.825	474833	356124	237435	118759	9998
3.83333	474830	356123	237438	118758	9997
3.84167	474828	356122	237439	118756	9997
3.85	474828	356121	237441	118756	9997
3.85833	474830	356121	237442	118757	9996
3.86667	474830	356122	237440	118760	9998
3.875	474829	356124	237441	118761	9999
3.88333	474829	356126	237443	118762	10001
3.89167	474827	356127	237444	118760	10002
3.9	474826	356126	237445	118756	10002
3.90833	474828	356129	237444	118752	10002
3.91667	474829	356130	237445	118751	10001
3.925	474831	356130	237444	118750	10000
3.93333	474832	356130	237442	118752	9998
3.94167	474834	356131	237439	118755	9996
3.95	474834	356131	237440	118756	9996
3.95833	474833	356131	237443	118758	9995
3.96667	474833	356132	237443	118757	9996
3.975	474834	356131	237444	118758	9998
3.98333	474833	356130	237448	118758	10000
3.99167	474833	356135	237448	118758	9997
4	474832	356138	237443	118760	9994
4.00833	474833	356138	237440	118761	9993
4.01667	474835	356138	237437	118763	9995
4.025	474837	356135	237435	118765	9996
4.03333	474838	356134	237436	118763	9996
4.04167	474837	356134	237437	118761	9995
4.05	474835	356134	237441	118759	9992
4.05833	474833	356130	237445	118757	9991
4.06667	474835	356129	237449	118758	9993
4.075	474836	356128	237449	118756	9994
4.08333	474838	356126	237444	118756	9994
4.09167	474839	356125	237439	118756	9993
4.1	474837	356122	237437	118757	9993
4.10833	474832	356124	237437	118761	9997
4.11667	474831	356127	237439	118761	9999
4.125	474831	356128	237440	118760	9998
4.13333	474832	356129	237442	118760	9992
4.14167	474832	356130	237443	118763	9986
4.15	474834	356130	237442	118766	9985
4.15833	474836	356131	237440	118765	9985
4.16667	474836	356131	237438	118763	9985
4.175	474838	356131	237436	118762	9984
4.18333	474841	356127	237436	118763	9984
4.19167	474843	356127	237437	118765	9985
4.2	474842	356128	237438	118766	9988
4.20833	474841	356128	237438	118767	9989
4.21667	474838	356127	237438	118766	9989
4.225	474837	356125	237439	118765	9989
4.23333	474838	356125	237440	118763	9992
4.24167	474839	356127	237442	118764	9995
4.25	474838	356127	237442	118765	9997
4.25833	474835	356127	237443	118767	10000
4.26667	474835	356129	237444	118768	10001
4.275	474837	356129	237444	118766	10002
4.28333	474839	356128	237445	118764	10005
4.29167	474839	356128	237446	118764	10005
4.3	474838	356128	237448	118764	10006
4.30833	474841	356130	237451	118762	10006
4.31667	474844	356133	237452	118762	10007
4.325	474845	356133	237452	118760	10006
4.33333	474846	356134	237452	118762	10004
4.34167	474843	356134	237452	118764	10002
4.35	474840	356132	237452	118767	10002
4.35833	474838	356133	237451	118769	10005
4.36667	474834	356132	237451	118769	10008
4.375	474832	356130	237451	118773	10008
4.38333	474837	356131	237451	118775	10011
4.39167	474840	356135	237452	118773	10011
4.4	474839	356136	237450	118770	10009
4.40833	474838	356137	237448	118771	10006
4.41667	474839	356135	237449	118772	10007
4.425	474841	356132	237452	118772	10006
4.43333	474844	356132	237453	118772	10005
4.44167	474849	356132	237454	118771	10006
4.45	474851	356134	237454	118772	10005
4.45833	474850	356135	237452	118773	10003
4.46667	474849	356132	237446	118774	10003
4.475	474848	356129	237444	118777	10006
4.48333	474849	356128	237447	118776	10008
4.49167	474851	356132	237448	118773	10009
4.5	474854	356136	237445	118773	10007
4.50833	474857	356139	237444	118773	10004
4.51667	474859	356139	237445	118772	10005
4.525	474858	356138	237450	118771	10007
4.53333	474856	356136	237456	118769	10009
4.54167	474855	356136	237459	118767	10010
4.55	474851	356135	237457	118766	10010
4.55833	474849	356136	237454	118769	10011
4.56667	474849	356137	237455	118771	10008
4.575	474847	356137	237454	118771	10002
4.58333	474845	356136	237454	118772	10001
4.59167	474845	356137	237452	118774	10001
4.6	474848	356138	237453	118774	10004
4.60833	474849	356136	237456	118775	10006
4.61667	474847	356137	237456	118776	10007
4.625	474845	356138	237453	118777	10005
4.63333	474843	356138	237450	118776	10006
4.64167	474842	356135	237450	118776	10008
4.65	474842	356134	237449	118776	10010
4.65833	474842	356136	237453	118773	10013
4.66667	474841	356141	237457	118771	10014
4.675	474839	356142	237457	118771	10013
4.68333	474836	356139	237453	118770	10012
4.69167	474838	356136	237450	118771	10014
4.7	474845	356136	237451	118771	10014
4.70833	474850	356136	237454	118773	10012
4.71667	474845	356136	237456	118773	10010
4.725	474839	356135	237457	118772	10011
4.73333	474835	356135	237457	118770	10010
4.74167	474831	356135	237456	118770	10008
4.75	474830	356135	237455	118772	10007
4.75833	474835	356133	237455	118771	10007
4.76667	474839	356136	237455	118766	10003
4.775	474838	356141	237455	118766	10001
4.78333	474835	356143	237454	118766	10002
4.79167	474838	356140	237454	118766	10007
4.8	474839	356138	237452	118765	10008
4.80833	474840	356138	237449	118764	10008
4.81667	474840	356140	237448	118765	10009
4.825	474842	356140	237450	118767	10006
4.83333	474842	356140	237451	118766	10002
4.84167	474839	356141	237451	118764	10000
4.85	474836	356143	237453	118766	9999
4.85833	474835	356141	237452	118768	9997
4.86667	474836	356141	237452	118767	9994
4.875	474836	356141	237451	118767	9992
4.88333	474837	356141	237451	118766	9990
4.89167	474838	356140	237450	118763	9991
4.9	474839	356138	237450	118763	9992
4.90833	474841	356136	237452	118763	9995
4.91667	474842	356131	237453	118764	9998
4.925	474842	356131	237454	118766	9998
4.93333	474841	356133	237455	118768	9998
4.94167	474842	356135	237454	118767	9999
4.95	474841	356135	237454	118768	9999
4.95833	474839	356136	237454	118769	9997
4.96667	474837	356139	237456	118770	9996
4.975	474837	356143	237458	118771	9995
4.98333	474837	356144	237459	118770	9995
4.99167	474838	356144	237456	118770	9994
5	474839	356146	237453	118772	9994
5.00833	474841	356145	237453	118773	9995
5.01667	474843	356142	237454	118772	9997
5.025	474844	356142	237455	118770	10000
5.03333	474844	356141	237456	118769	10002
5.04167	474844	356141	237455	118768	10001
5.05	474844	356140	237455	118767	10000
5.05833	474843	356141	237454	118765	10001
5.06667	474842	356144	237456	118760	10002
5.075	474839	356145	237457	118762	10003
5.08333	474838	356147	237457	118764	10003
5.09167	474840	356147	237457	118764	10002
5.1	474842	356146	237458	118762	10000
5.10833	474843	356144	237455	118760	9996
5.11667	474841	356141	237458	118761	9996
5.125	474840	356139	237459	118764	9997
5.13333	474840	356141	237459	118767	9996
5.14167	474840	356142	237457	118769	9995
5.15	474841	356144	237457	118770	9998
5.15833	474844	356147	237456	118768	10002
5.16667	474848	356151	237456	118764	10004
5.175	474848	356151	237455	118762	10003
5.18333	474845	356148	237455	118761	10000
5.19167	474844	356149	237455	118761	10001
5.2	474847	356151	237459	118763	10000
5.20833	474849	356151	237461	118765	9998
5.21667	474849	356154	237460	118767	9999
5.225	474847	356156	237461	118766	10001
5.23333	474847	356157	237462	118764	10001
5.24167	474847	356155	237461	118763	9998
5.25	474848	356154	237459	118763	10000
5.25833	474847	356152	237457	118764	10002
5.26667	474848	356151	237457	118764	10000
5.275	474850	356150	237454	118765	10001
5.28333	474850	356150	237453	118767	10004
5.29167	474850	356150	237456	118766	10004
5.3	474848	356149	237460	118764	10002
5.30833	474846	356147	237460	118762	10002
5.31667	474844	356146	237459	118763	10002
5.325	474841	356144	237458	118764	9999
5.33333	474839	356142	237458	118763	9996
5.34167	474837	356142	237459	118764	9996
5.35	474837	356141	237458	118766	9995
5.35833	474839	356137	237457	118766	9993
5.36667	474836	356131	237453	118766	9993
5.375	474827	356123	237446	118764	9993
5.38333	474816	356106	237431	118761	9993
5.39167	474797	356076	237407	118753	9991
5.4	474763	356021	237365	118736	9988
5.40833	474708	355934	237298	118703	9987
5.41667	474621	355797	237197	118648	9986
5.425	474490	355601	237049	118565	9983
5.43333	474307	355336	236847	118440	9985
5.44167	474060	354989	236575	118263	9989
5.45	473742	354551	236226	118028	9990
5.45833	473347	354016	235797	117723	9988
5.46667	472871	353383	235284	117335	9987
5.475	472310	352655	234686	116859	9986
5.48333	471668	351835	234005	116297	9982
5.49167	470947	350935	233243	115653	9978
5.5	470156	349957	232410	114927	9975
5.50833	469301	348907	231509	114122	9973
5.51667	468389	347792	230554	113246	9973
5.525	467425	346623	229551	112309	9974
5.53333	466418	345408	228505	111315	9983
5.54167	465375	344156	227421	110274	10000
5.55	464302	342871	226307	109194	10028
5.55833	463202	341560	225174	108080	10071
5.56667	462087	340228	224022	106937	10134
5.575	460961	338879	222861	105771	10226
5.58333	459829	337516	221694	104592	10356
5.59167	458698	336143	220519	103399	10520
5.6	457571	334765	219344	102202	10714
5.60833	456449	333382	218171	101000	10928
5.61667	455333	331998	217000	99794	11156
5.625	454224	330616	215833	98587	11385
5.63333	453120	329230	214668	97378	11594
5.64167	452016	327842	213502	96163	11761
5.65	450915	326451	212325	94943	11871
5.65833	449811	325057	211138	93713	11914
5.66667	448700	323660	209939	92473	11874
5.675	447579	322257	208723	91219	11745
5.68333	446440	320841	207484	89944	11520
5.69167	445283	319415	206226	88646	11201
5.7	444111	317976	204948	87325	10789
5.70833	442919	316522	203646	85979	10287
5.71667	441707	315053	202320	84608	9702
5.725	440478	313570	200973	83213	9036
5.73333	439228	312072	199605	81791	8295
5.74167	437956	310556	198221	80344	7486
5.75	436671	309023	196820	78878	6615
5.75833	435374	307478	195402	77397	5689
5.76667	434065	305923	193973	75901	4711
5.775	432746	304355	192539	74395	3685
5.78333	431417	302778	191102	72881	2621
5.79167	430085	301197	189667	71368	1522
5.8	428752	299615	188246	69859	385
5.80833	427421	298041	186839	68361	-780
5.81667	426103	296480	185458	66882	-1965
5.825	424807	294944	184115	65436	-3167
5.83333	423539	293438	182821	64031	-4378
5.84167	422313	291977	181595	62684	-5595
5.85	421142	290576	180460	61408	-6813
5.85833	420035	289270	179434	60220	-8024
5.86667	418999	288116	178539	59138	-9213
5.875	418029	287202	177788	58178	-10374
5.88333	417110	286652	177176	57336	-11497
5.89167	416211	286583	176670	56589	-12571
5.9	415294	287064	176217	55888	-13586
5.90833	414335	288112	175764	55169	-14540
5.91667	413347	289695	175278	54374	-15427
5.925	412385	291761	174772	53471	-16244
5.93333	411534	294275	174296	52469	-16987
5.94167	410908	297212	173928	51417	-17659
5.95	410635	300566	173769	50398	-18251
5.95833	410831	304348	173914	49503	-18754
5.96667	411594	308571	174445	48830	-19138
5.975	413001	313240	175424	48457	-19357
5.98333	415090	318358	176881	48440	-19346
5.99167	417869	323920	178821	48808	-19031
6	421327	329904	181231	49568	-18339
6.00833	425422	336285	184078	50700	-17211
6.01667	430095	343034	187322	52186	-15625
6.025	435280	350120	190920	53990	-13593
6.03333	440900	357504	194817	56063	-11162
6.04167	446867	365144	198959	58373	-8409
6.05	453092	372994	203296	60876	-5418
6.05833	459488	381015	207768	63538	-2283
6.06667	465969	389162	212330	66327	899
6.075	472459	397382	216939	69217	4049
6.08333	478887	405629	221545	72178	7106
6.09167	485189	413852	226116	75190	10030
6.1	491307	422013	230618	78237	12814
6.10833	497194	430062	235012	81308	15464
6.11667	502812	437953	239273	84395	18012
6.125	508136	445650	243383	87489	20490
6.13333	513156	453117	247320	90582	22926
6.14167	517876	460323	251084	93669	25345
6.15	522324	467243	254678	96753	27762
6.15833	526545	473857	258118	99838	30181
6.16667	530597	480157	261440	102936	32609
6.175	534561	486150	264676	106056	35056
6.18333	538541	491855	267866	109218	37528
6.19167	542661	497304	271062	112441	40021
6.2	547059	502533	274320	115748	42531
6.20833	551870	507591	277725	119166	45039
6.21667	557203	512533	281376	122730	47531
6.225	563129	517404	285394	126488	49984
6.23333	569642	522258	289912	130493	52373
6.24167	576628	527134	295035	134816	54678
6.25	583850	532066	300802	139550	56885
6.25833	591009	537104	307126	144792	58994
6.26667	597868	542322	313803	150621	60999
6.275	604326	547813	320577	157068	62905
6.28333	610431	553716	327256	164113	64716
6.29167	616309	560206	333775	171704	66450
6.3	622089	567528	340189	179779	68118
6.30833	627823	575962	346599	188273	69738
6.31667	633480	585647	353073	197114	71334
6.325	638985	596338	359609	206236	72928
6.33333	644275	607348	366152	215563	74546
6.34167	649328	617885	372630	225012	76220
6.35	654165	627466	378990	234518	77978
6.35833	658840	636079	385212	244027	79843
6.36667	663426	644034	391319	253514	81836
6.375	667967	651669	397347	262969	83968
6.38333	672476	659166	403325	272386	86243
6.39167	676927	666516	409264	281767	88660
6.4	681260	673622	415140	291106	91204
6.40833	685402	680424	420897	300371	93864
6.41667	689313	686948	426461	309512	96630
6.425	693025	693289	431767	318461	99481
6.43333	696635	699586	436803	327138	102396
6.44167	700272	705942	441606	335489	105362
6.45	704059	712373	446263	343507	108364
6.45833	708083	718779	450859	351210	111384
6.46667	712387	724947	455465	358630	114406
6.475	716968	730674	460127	365807	117411
6.48333	721807	735918	464860	372793	120376
6.49167	726868	740813	469664	379629	123276
6.5	732107	745613	474519	386344	126087
6.50833	737478	750586	479405	392957	128770
6.51667	742950	755920	484297	399479	131283
6.525	748484	761697	489176	405916	133577
6.53333	754051	767906	494013	412275	135594
6.54167	759614	774470	498788	418548	137270
6.55	765148	781282	503483	424729	138534
6.55833	770622	788233	508083	430807	139320
6.56667	775995	795205	512565	436778	139564
6.575	781214	802107	516913	442630	139207
6.58333	786207	808883	521097	448356	138211
6.59167	790880	815497	525078	453930	136560
6.6	795125	821927	528800	459304	134256
6.60833	798816	828182	532176	464423	131330
6.61667	801808	834285	535109	469191	127838
6.625	803962	840275	537497	473483	123853
6.63333	805165	846193	539224	477159	119471
6.64167	805339	852079	540187	480066	114795
6.65	804437	857937	540298	482068	109928
6.65833	802467	863729	539511	483057	104968
6.66667	799477	869364	537815	482959	100008
6.675	795571	874714	535229	481755	95128
6.68333	790883	879619	531812	479478	90398
6.69167	785562	883900	527657	476202	85872
6.7	779770	887416	522893	472064	81590
6.70833	773665	890049	517662	467218	77575
6.71667	767402	891726	512108	461825	73837
6.725	761113	892410	506369	456068	70378
6.73333	754908	892129	500586	450102	67189
6.74167	748865	890943	494879	444069	64242
6.75	743037	888933	489352	438106	61496
6.75833	737449	886212	484084	432309	58902
6.76667	732103	882881	479125	426750	56390
6.775	726983	879053	474508	421477	53871
6.78333	722056	874837	470235	416520	51238
6.79167	717273	870342	466295	411886	48364
6.8	712590	865672	462656	407569	45106
6.80833	707938	860960	459265	403544	41319
6.81667	703245	856365	456048	399756	36866
6.825	698441	852058	452915	396137	31640
6.83333	693454	848218	449758	392596	25588
6.84167	688204	845015	446454	389021	18720
6.85	682626	842613	442871	385276	11105
6.85833	676669	841109	438884	381228	2881
6.86667	670305	840501	434386	376741	-5780
6.875	663532	840671	429286	371698	-14689
6.88333	656370	841371	423529	366012	-23653
6.89167	648872	842251	417097	359638	-32507
6.9	641112	842883	410016	352586	-41116
6.90833	633183	842802	402353	344901	-49375
6.91667	625185	841574	394209	336666	-57213
6.925	617213	838825	385709	327996	-64588
6.93333	609345	834281	376994	319016	-71482
6.94167	601652	827788	368210	309864	-77894
6.95	594183	819297	359487	300667	-83833
6.95833	586969	808872	350936	291529	-89320
6.96667	580026	796672	342648	282548	-94381
6.975	573355	782932	334683	273800	-99049
6.98333	566949	767951	327076	265337	-103356
6.99167	560795	752055	319852	257202	-107331
7	554870	735580	313015	249411	-111008
7.00833	549144	718836	306545	241962	-114419
7.01667	543587	702122	300425	234841	-117596
7.025	538167	685703	294630	228020	-120569
7.03333	532844	669784	289113	221458	-123362
7.04167	527582	654522	283824	215104	-125998
7.05	522336	640035	278704	208897	-128503
7.05833	517065	626375	273683	202779	-130898
7.06667	511737	613554	268695	196691	-133202
7.075	506312	601531	263675	190574	-135431
7.08333	500761	590234	258564	184379	-137597
7.09167	495057	579568	253311	178060	-139722
7.1	489175	569423	247875	171578	-141818
7.10833	483103	559698	242232	164903	-143894
7.11667	476837	550296	236367	158004	-145954
7.125	470374	541118	230276	150868	-148005
7.13333	463718	532074	223961	143486	-150044
7.14167	456878	523075	217440	135864	-152066
7.15	449871	514021	210733	128015	-154056
7.15833	442720	504797	203869	119957	-155991
7.16667	435445	495284	196874	111715	-157842
7.175	428066	485371	189775	103319	-159571
7.18333	420610	474973	182603	94800	-161140
7.19167	413102	464046	175386	86194	-162504
7.2	405577	452600	168155	77540	-163628
7.20833	398072	440678	160943	68876	-164480
7.21667	390631	428356	153783	60234	-165033
7.225	383308	415721	146714	51661	-165270
7.23333	376168	402869	139782	43198	-165187
7.24167	369277	389890	133044	34895	-164792
7.25	362709	376868	126564	26808	-164101
7.25833	356544	363885	120403	18999	-163133
7.26667	350861	351024	114627	11536	-161910
7.275	345721	338366	109303	4494	-160460
7.28333	341183	325989	104492	-2049	-158811
7.29167	337286	313967	100244	-8022	-156991
7.3	334049	302382	96599	-13364	-155024
7.30833	331472	291303	93575	-18022	-152933
7.31667	329530	280806	91178	-21966	-150738
7.325	328193	270956	89397	-25188	-148462
7.33333	327412	261827	88203	-27702	-146122
7.34167	327131	253481	87555	-29534	-143729
7.35	327299	245970	87408	-30736	-141298
7.35833	327855	239334	87705	-31365	-138837
7.36667	328744	233595	88386	-31486	-136357
7.375	329923	228752	89400	-31166	-133864
7.38333	331353	224786	90688	-30469	-131365
7.39167	333006	221655	92203	-29448	-128868
7.4	334857	219307	93898	-28152	-126374
7.40833	336881	217680	95735	-26625	-123887
7.41667	339054	216701	97680	-24908	-121412
7.425	341350	216294	99704	-23025	-118951
7.43333	343734	216382	101785	-21004	-116505
7.44167	346173	216889	103903	-18868	-114077
7.45	348630	217752	106044	-16639	-111668
7.45833	351072	218917	108199	-14340	-109278
7.46667	353474	220334	110360	-11992	-106911
7.475	355819	221957	112523	-9622	-104569
7.48333	358098	223757	114682	-7250	-102245
7.49167	360311	225710	116835	-4892	-99945
7.5	362464	227791	118979	-2555	-97670
7.50833	364562	229974	121115	-247	-95419
7.51667	366614	232235	123241	2025	-93191
7.525	368628	234546	125356	4263	-90984
7.53333	370613	236871	127458	6471	-88797
7.54167	372574	239179	129549	8648	-86633
7.55	374517	241444	131626	10796	-84487
7.55833	376443	243646	133685	12915	-82354
7.56667	378353	245784	135727	15007	-80232
7.575	380253	247856	137750	17075	-78121
7.58333	382142	249865	139756	19121	-76010
7.59167	384020	251820	141737	21143	-73898
7.6	385890	253730	143694	23143	-71779
7.60833	387747	255608	145633	25122	-69649
7.61667	389601	257458	147552	27079	-67504
7.625	391454	259282	149451	29016	-65337
7.63333	393312	261087	151335	30938	-63147
7.64167	395177	262875	153205	32853	-60939
7.65	397054	264647	155064	34764	-58706
7.65833	398951	266400	156920	36673	-56450
7.66667	400871	268134	158779	38587	-54171
7.675	402820	269852	160645	40516	-51876
7.68333	404800	271554	162526	42462	-49572
7.69167	406819	273239	164428	44428	-47265
7.7	408878	274913	166356	46427	-44959
7.70833	410975	276578	168314	48460	-42665
7.71667	413109	278241	170306	50529	-40393
7.725	415281	279906	172335	52639	-38153
7.73333	417480	281582	174404	54786	-35952
7.74167	419701	283276	176510	56967	-33791
7.75	421937	284996	178655	59178	-31683
7.75833	424182	286750	180834	61418	-29637
7.76667	426421	288540	183041	63680	-27658
7.775	428646	290369	185270	65957	-25745
7.78333	430848	292245	187508	68238	-23906
7.79167	433015	294175	189752	70514	-22143
7.8	435137	296158	191990	72771	-20455
7.80833	437210	298193	194210	74997	-18849
7.81667	439223	300279	196400	77183	-17318
7.825	441168	302407	198548	79321	-15870
7.83333	443038	304574	200649	81402	-14495
7.84167	444828	306770	202689	83415	-13192
7.85	446536	308991	204658	85358	-11961
7.85833	448158	311226	206554	87220	-10797
7.86667	449694	313460	208370	89000	-9698
7.875	451146	315682	210101	90689	-8663
7.88333	452515	317882	211740	92294	-7689
7.89167	453804	320046	213288	93813	-6770
7.9	455015	322159	214744	95244	-5904
7.90833	456149	324215	216111	96586	-5088
7.91667	457212	326202	217392	97842	-4318
7.925	458209	328111	218593	99022	-3592
7.93333	459140	329933	219713	100124	-2911
7.94167	460011	331664	220756	101152	-2268
7.95	460824	333300	221725	102109	-1663
7.95833	461584	334839	222625	103002	-1093
7.96667	462296	336284	223464	103836	-555
7.975	462969	337634	224248	104617	-49
7.98333	463597	338891	224982	105346	430
7.99167	464187	340060	225667	106030	882
8	464738	341148	226305	106669	1309
8.00833	465259	342155	226898	107268	1711
8.01667	465752	343083	227452	107833	2092
8.025	466212	343938	227979	108366	2451
8.03333	466645	344727	228475	108863	2791
8.04167	467059	345458	228938	109331	3117
8.05	467453	346138	229373	109773	3424
8.05833	467826	346766	229781	110191	3713
8.06667	468175	347349	230171	110589	3986
8.075	468500	347891	230537	110965	4243
8.08333	468809	348395	230883	111321	4490
8.09167	469102	348868	231210	111655	4725
8.1	469382	349311	231520	111973	4948
8.10833	469649	349726	231816	112274	5160
8.11667	469904	350115	232098	112558	5363
8.125	470143	350481	232365	112830	5554
8.13333	470371	350824	232619	113092	5734
8.14167	470589	351148	232862	113341	5904
8.15	470797	351456	233091	113580	6066
8.15833	470992	351751	233309	113807	6220
8.16667	471176	352030	233516	114019	6369
8.175	471353	352295	233715	114226	6512
8.18333	471522	352543	233903	114424	6647
8.19167	471684	352778	234082	114609	6773
8.2	471838	353002	234254	114787	6892
8.20833	471986	353214	234423	114953	7006
8.21667	472124	353413	234583	115115	7119
8.225	472254	353604	234734	115271	7229
8.23333	472378	353785	234874	115415	7332
8.24167	472498	353956	235012	115554	7429
8.25	472614	354119	235144	115686	7524
8.25833	472718	354275	235266	115815	7613
8.26667	472818	354425	235380	115940	7697
8.275	472912	354565	235492	116058	7778
8.28333	473001	354696	235599	116170	7855
8.29167	473086	354819	235699	116277	7929
8.3	473168	354940	235795	116378	8002
8.30833	473250	355053	235888	116475	8070
8.31667	473324	355160	235976	116568	8131
8.325	473396	355264	236061	116653	8190
8.33333	473461	355363	236141	116735	8248
8.34167	473525	355458	236217	116816	8305
8.35	473586	355547	236289	116893	8358
8.35833	473645	355632	236358	116964	8407
8.36667	473701	355714	236424	117031	8454
8.375	473751	355791	236488	117096	8497
8.38333	473800	355862	236549	117160	8539
8.39167	473847	355928	236606	117221	8581
8.4	473894	355992	236660	117283	8622
8.40833	473939	356053	236714	117341	8657
8.41667	473980	356110	236764	117395	8691
8.425	474018	356163	236809	117445	8731
8.43333	474054	356218	236851	117494	8772
8.44167	474088	356268	236891	117541	8810
8.45	474121	356312	236930	117587	8841
8.45833	474151	356358	236965	117629	8872
8.46667	474181	356403	237001	117670	8905
8.475	474211	356445	237038	117709	8934
8.48333	474241	356483	237073	117745	8959
8.49167	474270	356521	237108	117780	8984
8.5	474297	356557	237139	117816	9009
8.50833	474322	356592	237167	117848	9033
8.51667	474346	356622	237195	117881	9055
8.525	474368	356648	237220	117913	9076
8.53333	474391	356674	237242	117940	9097
8.54167	474415	356701	237263	117966	9119
8.55	474439	356725	237283	117993	9139
8.55833	474460	356750	237307	118020	9156
8.56667	474477	356775	237327	118046	9172
8.575	474494	356797	237345	118071	9190
8.58333	474510	356817	237363	118093	9205
8.59167	474528	356837	237382	118114	9220
8.6	474543	356856	237399	118135	9234
8.60833	474557	356873	237417	118155	9247
8.61667	474569	356891	237434	118176	9262
8.625	474581	356907	237450	118196	9278
8.63333	474592	356925	237463	118213	9291
8.64167	474605	356942	237475	118226	9303
8.65	474619	356955	237487	118242	9315
8.65833	474634	356965	237497	118256	9329
8.66667	474646	356977	237507	118271	9343
8.675	474655	356989	237515	118288	9357
8.68333	474664	356999	237523	118302	9369
8.69167	474672	357010	237528	118316	9383
8.7	474679	357021	237532	118331	9398
8.70833	474688	357031	237539	118343	9408
8.71667	474696	357039	237547	118351	9414
8.725	474705	357046	237554	118359	9421
8.73333	474713	357054	237562	118369	9430
8.74167	474719	357063	237570	118379	9439
8.75	474726	357072	237576	118390	9448
8.75833	474731	357081	237584	118401	9458
8.76667	474734	357090	237593	118410	9465
8.775	474741	357098	237603	118415	9474
8.78333	474751	357107	237612	118421	9485
8.79167	474759	357117	237621	118425	9495
8.8	474767	357126	237629	118430	9504
8.80833	474775	357132	237638	118439	9513
8.81667	474780	357140	237648	118446	9520
8.825	474782	357148	237659	118452	9524
8.83333	474787	357158	237669	118460	9530
8.84167	474794	357168	237683	118467	9537
8.85	474800	357180	237701	118474	9542
8.85833	474802	357197	237721	118481	9547
8.86667	474804	357215	237747	118488	9555
8.875	474806	357233	237775	118494	9563
8.88333	474809	357252	237801	118499	9568
8.89167	474813	357277	237833	118504	9574
8.9	474819	357306	237869	118511	9579
8.90833	474824	357346	237909	118520	9585
8.91667	474825	357392	237952	118525	9593
8.925	474826	357442	238001	118526	9598
8.93333	474831	357498	238053	118529	9603
8.94167	474838	357564	238110	118533	9607
8.95	474846	357640	238172	118537	9612
8.95833	474853	357720	238239	118540	9617
8.96667	474859	357805	238308	118544	9623
8.975	474865	357898	238381	118548	9628
8.98333	474868	357998	238455	118553	9631
8.99167	474873	358102	238530	118558	9636
9	474875	358209	238604	118562	9643
9.00833	474878	358315	238677	118568	9649
9.01667	474886	358422	238749	118576	9655
9.025	474892	358522	238819	118581	9664
9.03333	474899	358618	238883	118587	9669
9.04167	474905	358711	238944	118593	9673
9.05	474908	358797	238998	118599	9679
9.05833	474910	358874	239049	118607	9687
9.06667	474915	358942	239097	118613	9694
9.075	474920	359004	239139	118618	9700
9.08333	474926	359057	239175	118625	9707
9.09167	474933	359100	239206	118631	9715
9.1	474939	359138	239230	118636	9723
9.10833	474945	359169	239249	118641	9729
9.11667	474952	359189	239263	118642	9734
9.125	474956	359200	239273	118644	9740
9.13333	474958	359206	239281	118646	9744
9.14167	474964	359205	239288	118652	9749
9.15	474970	359199	239294	118657	9753
9.15833	474975	359189	239292	118661	9758
9.16667	474979	359176	239286	118665	9764
9.175	474982	359158	239279	118671	9766
9.18333	474986	359139	239274	118677	9768
9.19167	474989	359118	239268	118681	9775
9.2	474991	359094	239260	118686	9785
9.20833	474995	359068	239254	118691	9793
9.21667	474998	359044	239242	118694	9798
9.225	474999	359020	239230	118695	9801
9.23333	475001	358991	239220	118697	9803
9.24167	475001	358963	239210	118700	9806
9.25	475002	358939	239204	118701	9811
9.25833	475005	358918	239201	118702	9817
9.26667	475006	358898	239198	118706	9821
9.275	475009	358881	239198	118711	9826
9.28333	475015	358868	239199	118715	9836
9.29167	475022	358860	239200	118716	9842
9.3	475028	358852	239203	118719	9845
9.30833	475027	358847	239206	118723	9847
9.31667	475029	358846	239210	118723	9847
9.325	475031	358849	239217	118725	9851
9.33333	475031	358852	239226	118727	9853
9.34167	475031	358852	239235	118732	9854
9.35	475031	358854	239242	118735	9858
9.35833	475033	358855	239247	118735	9865
9.36667	475032	358855	239251	118739	9869
9.375	475031	358854	239252	118743	9873
9.38333	475032	358855	239253	118746	9878
9.39167	475032	358855	239252	118748	9883
9.4	475035	358852	239248	118749	9889
9.40833	475040	358846	239243	118751	9892
9.41667	475043	358839	239236	118754	9892
9.425	475047	358827	239226	118756	9890
9.43333	475049	358815	239210	118758	9890
9.44167	475053	358800	239194	118756	9893
9.45	475056	358782	239176	118757	9898
9.45833	475056	358763	239156	118759	9899
9.46667	475057	358737	239137	118762	9898
9.475	475058	358709	239120	118767	9897
9.48333	475059	358684	239101	118772	9898
9.49167	475061	358663	239080	118776	9900
9.5	475063	358640	239063	118778	9903
9.50833	475065	358620	239044	118778	9907
9.51667	475070	358599	239023	118778	9911
9.525	475076	358582	239002	118780	9917
9.53333	475083	358567	238982	118783	9918
9.54167	475088	358554	238963	118785	9919
9.55	475090	358544	238949	118788	9920
9.55833	475094	358541	238937	118790	9919
9.56667	475098	358543	238925	118792	9922
9.575	475104	358549	238916	118797	9923
9.58333	475107	358560	238910	118804	9925
9.59167	475111	358580	238912	118810	9925
9.6	475114	358608	238921	118811	9929
9.60833	475117	358646	238936	118812	9930
9.61667	475121	358696	238963	118815	9928
9.625	475126	358762	239001	118816	9929
9.63333	475133	358848	239054	118816	9931
9.64167	475138	358954	239127	118817	9933
9.65	475145	359085	239216	118819	9936
9.65833	475154	359248	239327	118823	9937
9.66667	475163	359443	239463	118822	9938
9.675	475169	359671	239622	118820	9941
9.68333	475173	359939	239811	118823	9941
9.69167	475177	360248	240030	118827	9941
9.7	475178	360606	240282	118832	9940
9.70833	475185	361018	240569	118837	9941
9.71667	475195	361483	240895	118840	9946
9.725	475205	362002	241256	118845	9950
9.73333	475215	362574	241653	118851	9952
9.74167	475221	363198	242084	118857	9952
9.75	475227	363872	242546	118862	9950
9.75833	475236	364593	243032	118866	9950
9.76667	475248	365356	243540	118871	9951
9.775	475255	366156	244068	118873	9954
9.78333	475261	366982	244615	118873	9956
9.79167	475267	367825	245172	118875	9960
9.8	475274	368678	245732	118881	9962
9.80833	475283	369534	246294	118888	9963
9.81667	475288	370387	246850	118896	9963
9.825	475290	371224	247402	118902	9960
9.83333	475294	372036	247945	118904	9955
9.84167	475300	372819	248473	118906	9952
9.85	475307	373580	248985	118907	9949
9.85833	475313	374314	249480	118907	9949
9.86667	475317	375027	249959	118908	9948
9.875	475319	375720	250425	118913	9949
9.88333	475323	376403	250884	118915	9949
9.89167	475325	377083	251339	118916	9949
9.9	475325	377769	251790	118918	9950
9.90833	475325	378470	252245	118918	9950
9.91667	475326	379195	252713	118918	9950
9.925	475325	379956	253201	118919	9948
9.93333	475323	380756	253710	118920	9949
9.94167	475323	381600	254246	118919	9949
9.95	475325	382492	254812	118921	9948
9.95833	475328	383432	255409	118922	9945
9.96667	475326	384409	256035	118919	9945
9.975	475321	385409	256690	118915	9942
9.98333	475315	386416	257369	118914	9940
9.99167	475312	387416	258064	118916	9939
10	475310	388387	258762	118917	9937
10.0083	475307	389302	259453	118916	9937
10.0167	475304	390139	260130	118916	9936
10.025	475304	390884	260779	118915	9935
10.0333	475302	391514	261384	118912	9933
10.0417	475301	392019	261937	118911	9931
10.05	475299	392396	262426	118915	9930
10.0583	475298	392640	262843	118919	9931
10.0667	475299	392755	263190	118921	9931
10.075	475301	392749	263459	118923	9930
10.0833	475303	392637	263650	118925	9931
10.0917	475303	392432	263768	118928	9937
10.1	475303	392148	263816	118929	9942
10.1083	475304	391803	263802	118929	9939
10.1167	475305	391411	263733	118933	9935
10.125	475308	390988	263613	118937	9933
10.1333	475308	390550	263453	118942	9931
10.1417	475310	390104	263263	118951	9930
10.15	475311	389656	263048	118958	9928
10.1583	475314	389215	262814	118962	9928
10.1667	475319	388787	262566	118966	9929
10.175	475324	388376	262313	118973	9927
10.1833	475328	387984	262054	118980	9924
10.1917	475334	387613	261792	118985	9922
10.2	475342	387261	261534	118993	9923
10.2083	475348	386927	261281	119001	9924
10.2167	475353	386613	261031	119012	9925
10.225	475360	386321	260783	119024	9926
10.2333	475367	386046	260541	119032	9930
10.2417	475377	385789	260306	119038	9931
10.25	475388	385550	260077	119048	9928
10.2583	475399	385329	259857	119056	9927
10.2667	475410	385131	259641	119065	9928
10.275	475419	384957	259433	119074	9928
10.2833	475426	384808	259238	119082	9928
10.2917	475436	384685	259052	119091	9929
10.3	475448	384589	258878	119102	9929
10.3083	475461	384518	258717	119113	9929
10.3167	475475	384473	258573	119124	9929
10.325	475488	384442	258447	119132	9929
10.3333	475502	384416	258339	119139	9929
10.3417	475512	384388	258245	119149	9930
10.35	475519	384344	258162	119161	9931
10.3583	475528	384268	258090	119176	9932
10.3667	475540	384155	258025	119186	9932
10.375	475555	383990	257963	119196	9934
10.3833	475568	383759	257895	119205	9937
10.3917	475576	383459	257809	119212	9939
10.4	475585	383089	257697	119220	9940
10.4083	475596	382656	257552	119226	9939
10.4167	475604	382168	257372	119233	9937
10.425	475612	381635	257153	119242	9935
10.4333	475622	381066	256896	119249	9934
10.4417	475632	380470	256601	119254	9935
10.45	475641	379856	256267	119262	9937
10.4583	475645	379233	255897	119269	9936
10.4667	475649	378612	255504	119274	9935
10.475	475652	378000	255091	119279	9938
10.4833	475656	377406	254663	119283	9942
10.4917	475656	376835	254229	119288	9943
10.5	475658	376287	253796	119290	9942
10.5083	475658	375765	253362	119290	9941
10.5167	475656	375267	252930	119293	9938
10.525	475657	374793	252508	119295	9938
10.5333	475657	374344	252099	119293	9941
10.5417	475657	373922	251700	119293	9941
10.55	475657	373523	251311	119294	9938
10.5583	475656	373149	250938	119296	9937
10.5667	475655	372796	250579	119299	9939
10.575	475650	372466	250232	119299	9940
10.5833	475643	372161	249901	119297	9941
10.5917	475639	371882	249588	119296	9939
10.6	475634	371628	249291	119295	9942
10.6083	475629	371394	249007	119294	9946
10.6167	475624	371180	248738	119291	9945
10.625	475620	370990	248483	119289	9943
10.6333	475616	370822	248246	119288	9942
10.6417	475612	370675	248029	119290	9943
10.65	475609	370548	247828	119290	9946
10.6583	475608	370439	247640	119286	9948
10.6667	475606	370349	247467	119283	9945
10.675	475602	370276	247312	119280	9944
10.6833	475598	370218	247171	119278	9943
10.6917	475590	370172	247043	119279	9943
10.7	475582	370138	246928	119283	9943
10.7083	475579	370115	246827	119285	9944
10.7167	475575	370098	246743	119284	9947
10.725	475572	370086	246672	119282	9949
10.7333	475568	370076	246611	119280	9950
10.7417	475561	370070	246564	119277	9950
10.75	475550	370065	246520	119275	9947
10.7583	475541	370059	246482	119275	9948
10.7667	475536	370047	246451	119276	9949
10.775	475529	370028	246425	119277	9949
10.7833	475525	370004	246404	119275	9947
10.7917	475524	369979	246388	119271	9948
10.8	475522	369949	246373	119266	9950
10.8083	475519	369910	246359	119261	9953
10.8167	475512	369864	246345	119255	9953
10.825	475506	369815	246324	119253	9951
10.8333	475500	369764	246302	119254	9948
10.8417	475496	369707	246278	119251	9946
10.85	475496	369646	246253	119252	9945
10.8583	475496	369581	246224	119251	9945
10.8667	475492	369513	246193	119248	9948
10.875	475488	369440	246159	119248	9950
10.8833	475485	369362	246125	119250	9952
10.8917	475479	369284	246091	119252	9954
10.9	475475	369204	246054	119250	9958
10.9083	475475	369124	246016	119248	9961
10.9167	475474	369044	245978	119247	9962
10.925	475474	368965	245941	119247	9962
10.9333	475477	368884	245902	119243	9963
10.9417	475477	368800	245860	119244	9961
10.95	475476	368715	245821	119246	9961
10.9583	475475	368631	245785	119247	9961
10.9667	475477	368545	245751	119250	9959
10.975	475480	368455	245718	119254	9961
10.9833	475484	368365	245687	119257	9964
10.9917	475491	368278	245657	119257	9967
11	475493	368192	245627	119261	9971
11.0083	475493	368106	245596	119268	9975
11.0167	475495	368020	245570	119276	9977
11.025	475493	367933	245548	119280	9979
11.0333	475494	367844	245529	119283	9981
11.0417	475497	367756	245509	119290	9982
11.05	475502	367670	245490	119299	9983
11.0583	475507	367586	245474	119307	9984
11.0667	475517	367506	245462	119317	9984
11.075	475524	367430	245449	119327	9987
11.0833	475529	367359	245436	119337	9990
11.0917	475537	367292	245424	119348	9990
11.1	475545	367230	245415	119360	9990
11.1083	475551	367174	245407	119375	9989
11.1167	475558	367129	245400	119390	9988
11.125	475565	367088	245396	119404	9992
11.1333	475572	367054	245394	119420	9996
11.1417	475582	367031	245392	119436	9996
11.15	475595	367019	245389	119452	9995
11.1583	475609	367021	245385	119473	9996
11.1667	475620	367032	245381	119495	9998
11.175	475633	367055	245380	119517	9998
11.1833	475644	367100	245376	119539	9999
11.1917	475654	367161	245371	119558	10000
11.2	475667	367236	245364	119578	9998
11.2083	475684	367329	245357	119598	9997
11.2167	475697	367443	245350	119621	9995
11.225	475711	367577	245339	119645	9994
11.2333	475726	367731	245325	119670	9993
11.2417	475743	367906	245308	119695	9988
11.25	475757	368106	245287	119718	9986
11.2583	475771	368324	245261	119739	9986
11.2667	475786	368559	245232	119758	9984
11.275	475802	368818	245195	119779	9983
11.2833	475814	369095	245152	119801	9982
11.2917	475825	369386	245107	119823	9983
11.3	475837	369695	245059	119844	9987
11.3083	475853	370021	245005	119864	9989
11.3167	475870	370358	244944	119882	9987
11.325	475885	370709	244875	119899	9984
11.3333	475903	371070	244803	119919	9982
11.3417	475917	371440	244734	119944	9983
11.35	475930	371816	244661	119965	9983
11.3583	475942	372197	244582	119986	9982
11.3667	475957	372580	244498	120010	9979
11.375	475972	372962	244406	120038	9976
11.3833	475987	373342	244311	120066	9973
11.3917	476002	373719	244217	120097	9974
11.4	476023	374091	244121	120132	9976
11.4083	476047	374455	244022	120172	9976
11.4167	476072	374808	243920	120217	9978
11.425	476104	375144	243821	120270	9979
11.4333	476141	375467	243723	120329	9981
11.4417	476187	375776	243624	120399	9984
11.45	476241	376067	243523	120479	9986
11.4583	476300	376335	243422	120571	9985
11.4667	476369	376588	243321	120679	9980
11.475	476445	376819	243216	120804	9975
11.4833	476533	377031	243114	120950	9972
11.4917	476634	377221	243013	121113	9974
11.5	476757	377386	242913	121296	9974
11.5083	476898	377526	242815	121502	9976
11.5167	477056	377640	242721	121732	9979
11.525	477234	377729	242630	121989	9980
11.5333	477432	377800	242537	122273	9979
11.5417	477650	377847	242444	122584	9976
11.55	477893	377872	242351	122922	9972
11.5583	478159	377877	242260	123292	9970
11.5667	478449	377859	242170	123692	9970
11.575	478763	377823	242087	124117	9969
11.5833	479097	377770	242007	124567	9967
11.5917	479454	377701	241927	125039	9967
11.6	479834	377619	241849	125536	9963
11.6083	480232	377525	241773	126055	9962
11.6167	480650	377423	241700	126595	9962
11.625	481086	377312	241628	127149	9962
11.6333	481536	377195	241558	127711	9962
11.6417	481994	377071	241488	128287	9965
11.65	482461	376942	241422	128868	9965
11.6583	482935	376817	241359	129449	9966
11.6667	483414	376698	241295	130029	9966
11.675	483895	376580	241230	130607	9964
11.6833	484370	376464	241169	131182	9960
11.6917	484841	376354	241114	131745	9957
11.7	485304	376246	241061	132295	9956
11.7083	485757	376140	241011	132830	9953
11.7167	486199	376037	240962	133346	9952
11.725	486630	375938	240915	133842	9952
11.7333	487046	375845	240870	134321	9951
11.7417	487447	375755	240830	134780	9953
11.75	487833	375669	240796	135214	9955
11.7583	488202	375588	240759	135627	9953
11.7667	488551	375512	240720	136017	9952
11.775	488881	375439	240686	136383	9954
11.7833	489195	375370	240657	136725	9953
11.7917	489490	375301	240635	137045	9950
11.8	489766	375234	240615	137346	9950
11.8083	490023	375170	240595	137626	9952
11.8167	490259	375107	240576	137882	9950
11.825	490477	375040	240562	138113	9948
11.8333	490677	374975	240553	138323	9950
11.8417	490859	374907	240547	138520	9953
11.85	491029	374839	240545	138700	9954
11.8583	491185	374773	240546	138860	9955
11.8667	491328	374708	240551	139004	9952
11.875	491454	374639	240561	139134	9949
11.8833	491568	374571	240575	139248	9948
11.8917	491667	374502	240589	139348	9950
11.9	491751	374433	240608	139438	9957
11.9083	491826	374361	240633	139514	9959
11.9167	491891	374288	240664	139575	9958
11.925	491944	374215	240700	139623	9958
11.9333	491987	374149	240739	139659	9961
11.9417	492022	374086	240781	139686	9962
11.95	492047	374024	240827	139703	9962
11.9583	492065	373964	240877	139712	9962
11.9667	492072	373906	240931	139712	9962
11.975	492071	373854	240991	139700	9960
11.9833	492062	373807	241052	139678	9959
11.9917	492045	373761	241111	139648	9961
12	492022	373717	241175	139610	9959
12.0083	491988	373678	241243	139565	9959
12.0167	491943	373647	241313	139509	9957
12.025	491890	373624	241381	139444	9951
12.0333	491835	373607	241450	139372	9950
12.0417	491773	373594	241520	139288	9952
12.05	491703	373589	241589	139195	9954
12.0583	491628	373587	241657	139095	9956
12.0667	491544	373589	241725	138990	9956
12.075	491453	373596	241792	138874	9954
12.0833	491357	373610	241855	138744	9953
12.0917	491253	373625	241919	138605	9955
12.1	491139	373642	241976	138463	9955
12.1083	491017	373658	242027	138312	9953
12.1167	490892	373679	242079	138154	9950
12.125	490767	373703	242129	137995	9948
12.1333	490641	373727	242175	137832	9950
12.1417	490515	373751	242214	137667	9952
12.15	490385	373777	242255	137502	9953
12.1583	490254	373801	242291	137339	9951
12.1667	490129	373823	242325	137173	9947
12.175	490009	373843	242355	137010	9945
12.1833	489894	373866	242380	136857	9945
12.1917	489790	373891	242403	136715	9947
12.2	489695	373910	242425	136582	9951
12.2083	489612	373926	242443	136458	9956
12.2167	489539	373942	242458	136341	9957
12.225	489477	373955	242472	136240	9957
12.2333	489428	373971	242485	136158	9960
12.2417	489393	373983	242496	136090	9962
12.25	489370	373994	242504	136038	9967
12.2583	489362	374000	242512	136007	9969
12.2667	489371	374004	242517	135993	9967
12.275	489393	374007	242521	135997	9968
12.2833	489428	374008	242525	136015	9970
12.2917	489474	374008	242528	136047	9969
12.3	489528	374009	242532	136094	9970
12.3083	489594	374007	242534	136155	9970
12.3167	489668	374002	242533	136228	9970
12.325	489744	373998	242531	136311	9971
12.3333	489823	373993	242527	136400	9977
12.3417	489908	373983	242522	136496	9984
12.35	489994	373969	242517	136595	9987
12.3583	490077	373954	242512	136696	9987
12.3667	490155	373939	242506	136796	9984
12.375	490228	373921	242502	136892	9983
12.3833	490292	373901	242499	136982	9983
12.3917	490347	373875	242496	137064	9984
12.4	490390	373846	242491	137133	9988
12.4083	490423	373813	242483	137191	9992
12.4167	490441	373775	242470	137237	9996
12.425	490448	373734	242458	137267	9997
12.4333	490440	373690	242452	137278	9996
12.4417	490410	373647	242448	137276	9994
12.45	490363	373603	242447	137256	9993
12.4583	490299	373551	242445	137216	9991
12.4667	490223	373494	242445	137156	9993
12.475	490136	373437	242448	137075	9997
12.4833	490032	373374	242450	136973	10002
12.4917	489913	373307	242454	136854	10004
12.5	489776	373239	242462	136718	10000
12.5083	489622	373169	242474	136568	10000
12.5167	489454	373093	242491	136399	10001
12.525	489275	373014	242515	136210	10005
12.5333	489086	372933	242540	136006	10007
12.5417	488885	372855	242568	135785	10008
12.55	488674	372775	242597	135547	10006
12.5583	488452	372692	242629	135295	10005
12.5667	488221	372611	242664	135031	10006
12.575	487981	372528	242706	134757	10006
12.5833	487735	372444	242754	134470	10007
12.5917	487482	372361	242807	134171	10006
12.6	487222	372281	242864	133864	10004
12.6083	486952	372201	242922	133550	10006
12.6167	486680	372118	242984	133231	10010
12.625	486408	372037	243049	132906	10013
12.6333	486130	371956	243117	132577	10015
12.6417	485849	371879	243186	132241	10018
12.65	485569	371803	243254	131900	10020
12.6583	485293	371731	243325	131559	10023
12.6667	485014	371659	243397	131217	10027
12.675	484734	371587	243472	130872	10030
12.6833	484454	371517	243546	130529	10033
12.6917	484173	371451	243622	130187	10038
12.7	483893	371389	243703	129844	10046
12.7083	483616	371334	243789	129501	10055
12.7167	483342	371286	243877	129159	10058
12.725	483067	371246	243966	128824	10058
12.7333	482796	371208	244057	128491	10060
12.7417	482533	371179	244151	128158	10065
12.75	482273	371163	244249	127827	10069
12.7583	482016	371153	244352	127501	10074
12.7667	481762	371157	244460	127179	10081
12.775	481517	371175	244573	126864	10089
12.7833	481277	371205	244694	126556	10099
12.7917	481043	371249	244824	126257	10104
12.8	480816	371311	244963	125966	10110
12.8083	480599	371384	245111	125680	10116
12.8167	480395	371474	245273	125400	10122
12.825	480201	371584	245447	125130	10125
12.8333	480015	371714	245639	124870	10130
12.8417	479841	371864	245846	124623	10137
12.85	479679	372034	246067	124387	10141
12.8583	479529	372226	246305	124161	10146
12.8667	479386	372443	246566	123947	10152
12.875	479252	372683	246846	123747	10155
12.8833	479128	372945	247144	123562	10158
12.8917	479015	373235	247461	123392	10158
12.9	478912	373548	247804	123232	10157
12.9083	478819	373885	248176	123085	10155
12.9167	478735	374243	248574	122949	10156
12.925	478656	374620	248995	122824	10157
12.9333	478580	375017	249441	122711	10159
12.9417	478510	375437	249909	122611	10157
12.95	478445	375879	250405	122521	10153
12.9583	478381	376335	250927	122438	10149
12.9667	478318	376802	251470	122360	10147
12.975	478258	377284	252037	122287	10147
12.9833	478199	377772	252623	122220	10145
12.9917	478143	378262	253223	122155	10143
13	478086	378757	253837	122091	10137
13.0083	478028	379252	254462	122030	10130
13.0167	477965	379740	255100	121971	10123
13.025	477899	380225	255750	121914	10119
13.0333	477831	380703	256406	121854	10119
13.0417	477762	381169	257062	121795	10120
13.05	477696	381619	257719	121733	10118
13.0583	477631	382055	258369	121669	10114
13.0667	477567	382475	259014	121605	10109
13.075	477497	382878	259649	121538	10104
13.0833	477427	383260	260270	121468	10100
13.0917	477356	383621	260874	121396	10096
13.1	477283	383965	261463	121326	10093
13.1083	477209	384290	262034	121255	10088
13.1167	477138	384593	262590	121185	10084
13.125	477069	384874	263123	121114	10081
13.1333	477002	385137	263633	121041	10081
13.1417	476937	385383	264126	120966	10081
13.15	476875	385606	264592	120895	10082
13.1583	476817	385809	265029	120823	10083
13.1667	476758	385992	265438	120754	10083
13.175	476698	386156	265825	120688	10081
13.1833	476639	386309	266190	120624	10079
13.1917	476585	386450	266529	120556	10077
13.2	476533	386574	266843	120491	10075
13.2083	476480	386680	267129	120430	10071
13.2167	476430	386776	267389	120373	10066
13.225	476381	386861	267627	120315	10066
13.2333	476336	386936	267841	120260	10065
13.2417	476298	386997	268029	120205	10065
13.25	476258	387047	268198	120152	10065
13.2583	476219	387087	268346	120099	10064
13.2667	476181	387116	268471	120050	10065
13.275	476145	387133	268577	120006	10067
13.2833	476111	387143	268664	119962	10066
13.2917	476078	387147	268732	119919	10065
13.3	476046	387143	268779	119877	10064
13.3083	476010	387130	268807	119835	10067
13.3167	475978	387106	268819	119796	10071
13.325	475950	387072	268818	119762	10074
13.3333	475924	387034	268801	119730	10076
13.3417	475901	386986	268766	119702	10078
13.35	475878	386928	268716	119674	10082
13.3583	475857	386860	268652	119646	10084
13.3667	475838	386787	268578	119619	10084
13.375	475817	386708	268493	119592	10083
13.3833	475795	386620	268394	119568	10084
13.3917	475773	386521	268286	119549	10083
13.4	475751	386416	268171	119527	10082
13.4083	475728	386306	268046	119505	10080
13.4167	475710	386189	267912	119486	10079
13.425	475695	386069	267771	119466	10076
13.4333	475678	385944	267626	119445	10072
13.4417	475661	385813	267475	119425	10071
13.45	475641	385677	267323	119406	10071
13.4583	475621	385535	267171	119387	10070
13.4667	475601	385386	267016	119368	10071
13.475	475582	385235	266861	119353	10071
13.4833	475562	385080	266708	119339	10068
13.4917	475540	384921	266559	119328	10067
13.5	475522	384763	266408	119316	10065
13.5083	475506	384604	266256	119303	10063
13.5167	475493	384444	266109	119293	10061
13.525	475481	384286	265963	119279	10057
13.5333	475469	384128	265823	119269	10052
13.5417	475454	383968	265689	119263	10049
13.55	475440	383809	265554	119259	10048
13.5583	475426	383649	265422	119250	10045
13.5667	475412	383493	265289	119241	10043
13.575	475396	383340	265158	119233	10040
13.5833	475384	383188	265030	119224	10035
13.5917	475372	383039	264905	119213	10031
13.6	475360	382891	264778	119206	10028
13.6083	475346	382745	264649	119199	10024
13.6167	475337	382603	264520	119194	10022
13.625	475329	382459	264391	119187	10025
13.6333	475321	382320	264259	119178	10024
13.6417	475310	382184	264123	119169	10021
13.65	475302	382047	263980	119160	10015
13.6583	475295	381912	263833	119153	10015
13.6667	475291	381779	263678	119148	10017
13.675	475282	381649	263513	119142	10016
13.6833	475274	381520	263344	119136	10016
13.6917	475268	381385	263171	119134	10017
13.7	475261	381246	262994	119131	10017
13.7083	475252	381108	262806	119126	10011
13.7167	475244	380968	262610	119122	10007
13.725	475241	380826	262406	119118	10005
13.7333	475239	380681	262190	119116	10004
13.7417	475231	380532	261968	119113	10005
13.75	475224	380382	261742	119109	10003
13.7583	475220	380226	261507	119106	9999
13.7667	475216	380067	261265	119105	9995
13.775	475215	379905	261018	119105	9993
13.7833	475213	379736	260764	119103	9994
13.7917	475211	379558	260501	119100	9995
13.8	475208	379376	260236	119098	9994
13.8083	475202	379190	259965	119097	9991
13.8167	475200	378995	259688	119094	9993
13.825	475199	378794	259404	119091	9996
13.8333	475195	378592	259116	119087	9997
13.8417	475191	378384	258821	119081	9997
13.85	475186	378164	258521	119077	9996
13.8583	475185	377936	258218	119075	9991
13.8667	475185	377705	257913	119073	9989
13.875	475181	377470	257604	119072	9987
13.8833	475179	377227	257292	119070	9984
13.8917	475179	376979	256977	119067	9984
13.9	475179	376723	256659	119064	9984
13.9083	475175	376458	256338	119063	9985
13.9167	475172	376186	256016	119061	9987
13.925	475174	375910	255695	119061	9985
13.9333	475174	375633	255377	119059	9984
13.9417	475171	375353	255058	119057	9986
13.95	475169	375063	254739	119056	9984
13.9583	475165	374768	254420	119055	9982
13.9667	475160	374469	254104	119055	9984
13.975	475156	374169	253789	119052	9986
13.9833	475152	373868	253477	119049	9987
13.9917	475147	373564	253169	119045	9986
14	475145	373262	252863	119042	9987
14.0083	475142	372953	252562	119040	9984
14.0167	475144	372639	252262	119040	9982
14.025	475144	372324	251965	119042	9982
14.0333	475141	372010	251672	119042	9980
14.0417	475141	371701	251381	119040	9978
14.05	475140	371392	251095	119037	9976
14.0583	475137	371086	250815	119033	9976
14.0667	475135	370783	250540	119034	9973
14.075	475133	370483	250266	119036	9972
14.0833	475130	370185	249994	119034	9973
14.0917	475126	369884	249727	119030	9971
14.1	475122	369584	249462	119028	9971
14.1083	475120	369291	249198	119029	9972
14.1167	475119	369002	248931	119028	9971
14.125	475119	368713	248666	119029	9969
14.1333	475119	368425	248405	119031	9968
14.1417	475119	368145	248147	119029	9970
14.15	475117	367867	247892	119026	9971
14.1583	475115	367594	247639	119024	9969
14.1667	475113	367324	247388	119021	9968
14.175	475109	367055	247140	119020	9969
14.1833	475107	366785	246888	119019	9969
14.1917	475105	366517	246636	119020	9968
14.2	475102	366254	246387	119023	9965
14.2083	475101	365997	246139	119024	9962
14.2167	475101	365741	245888	119023	9964
14.225	475097	365483	245640	119022	9966
14.2333	475095	365229	245394	119020	9968
14.2417	475096	364977	245152	119021	9971
14.25	475099	364725	244913	119023	9971
14.2583	475099	364475	244676	119024	9965
14.2667	475097	364227	244442	119024	9960
14.275	475095	363982	244210	119024	9958
14.2833	475095	363738	243983	119024	9960
14.2917	475092	363499	243761	119025	9963
14.3	475090	363263	243543	119027	9967
14.3083	475088	363033	243328	119032	9967
14.3167	475088	362807	243120	119036	9966
14.325	475086	362582	242916	119039	9966
14.3333	475082	362357	242716	119041	9968
14.3417	475079	362140	242526	119043	9969
14.35	475080	361928	242341	119041	9970
14.3583	475083	361722	242160	119039	9970
14.3667	475084	361518	241984	119042	9965
14.375	475082	361317	241816	119048	9962
14.3833	475082	361125	241655	119052	9962
14.3917	475084	360941	241501	119051	9963
14.4	475085	360759	241354	119053	9963
14.4083	475086	360583	241214	119057	9964
14.4167	475089	360413	241078	119063	9963
14.425	475088	360250	240947	119065	9962
14.4333	475087	360094	240823	119067	9963
14.4417	475085	359944	240708	119069	9965
14.45	475084	359801	240602	119068	9967
14.4583	475086	359663	240501	119068	9969
14.4667	475086	359537	240403	119069	9970
14.475	475087	359419	240311	119072	9969
14.4833	475089	359304	240226	119075	9969
14.4917	475092	359191	240147	119077	9968
14.5	475095	359086	240077	119077	9968
14.5083	475098	358985	240012	119077	9969
14.5167	475097	358895	239954	119079	9969
14.525	475096	358809	239901	119083	9969
14.5333	475094	358729	239850	119084	9969
14.5417	475095	358659	239807	119086	9971
14.55	475096	358594	239768	119090	9974
14.5583	475099	358533	239737	119091	9977
14.5667	475103	358481	239710	119091	9979
14.575	475107	358434	239691	119091	9980
14.5833	475110	358397	239677	119094	9984
14.5917	475113	358368	239672	119097	9985
14.6	475116	358344	239672	119099	9983
14.6083	475116	358330	239679	119103	9981
14.6167	475117	358322	239690	119105	9981
14.625	475119	358320	239708	119108	9983
14.6333	475121	358327	239731	119112	9985
14.6417	475124	358345	239764	119117	9987
14.65	475124	358371	239806	119119	9986
14.6583	475125	358404	239853	119123	9986
14.6667	475126	358444	239909	119130	9989
14.675	475129	358497	239974	119133	9989
14.6833	475131	358559	240045	119137	9989
14.6917	475132	358634	240126	119138	9986
14.7	475134	358719	240213	119139	9987
14.7083	475136	358814	240301	119139	9988
14.7167	475141	358919	240397	119139	9991
14.725	475146	359034	240501	119140	9992
14.7333	475149	359159	240613	119141	9992
14.7417	475151	359295	240732	119145	9994
14.75	475150	359441	240854	119148	9994
14.7583	475149	359597	240980	119154	9996
14.7667	475151	359763	241113	119161	9999
14.775	475155	359943	241252	119166	10001
14.7833	475154	360134	241394	119168	10000
14.7917	475155	360332	241542	119168	10000
14.8	475158	360540	241693	119167	10001
14.8083	475161	360758	241848	119168	10005
14.8167	475164	360980	242003	119173	10009
14.825	475166	361212	242159	119172	10012
14.8333	475165	361449	242318	119173	10014
14.8417	475161	361694	242478	119174	10016
14.85	475157	361946	242637	119173	10017
14.8583	475157	362197	242795	119172	10016
14.8667	475159	362453	242953	119171	10013
14.875	475160	362713	243110	119170	10012
14.8833	475160	362973	243263	119168	10014
14.8917	475159	363230	243410	119165	10015
14.9	475158	363488	243553	119163	10015
14.9083	475156	363745	243693	119163	10019
14.9167	475153	363999	243826	119163	10023
14.925	475151	364248	243951	119163	10024
14.9333	475149	364490	244066	119160	10023
14.9417	475146	364724	244175	119156	10024
14.95	475141	364951	244282	119153	10024
14.9583	475138	365167	244380	119150	10024
14.9667	475138	365375	244471	119147	10022
14.975	475140	365573	244554	119143	10021
14.9833	475140	365755	244627	119137	10022
14.9917	475139	365924	244689	119134	10022
15	475138	366081	244742	119132	10023
15.0083	475137	366222	244788	119130	10024
15.0167	475132	366351	244828	119128	10028
15.025	475128	366465	244862	119126	10030
15.0333	475130	366570	244887	119124	10030
15.0417	475133	366663	244904	119121	10033
15.05	475136	366744	244912	119116	10035
15.0583	475136	366813	244915	119110	10036
15.0667	475134	366867	244913	119104	10038
15.075	475133	366912	244907	119100	10040
15.0833	475132	366949	244898	119097	10042
15.0917	475131	366977	244885	119095	10043
15.1	475127	366998	244866	119093	10044
15.1083	475127	367008	244846	119092	10044
15.1167	475126	367009	244824	119091	10043
15.125	475124	367008	244803	119090	10043
15.1333	475123	367004	244782	119091	10043
15.1417	475119	366999	244764	119091	10044
15.15	475117	366994	244751	119091	10048
15.1583	475115	366990	244747	119094	10050
15.1667	475117	366991	244750	119095	10053
15.175	475120	366996	244760	119092	10053
15.1833	475124	367006	244776	119086	10055
15.1917	475127	367025	244801	119085	10058
15.2	475130	367056	244842	119083	10061
15.2083	475130	367103	244896	119079	10061
15.2167	475124	367166	244961	119077	10059
15.225	475120	367245	245039	119075	10061
15.2333	475123	367340	245130	119073	10065
15.2417	475126	367455	245234	119075	10067
15.25	475129	367594	245354	119078	10065
15.2583	475134	367753	245492	119080	10064
15.2667	475137	367935	245644	119081	10066
15.275	475138	368138	245808	119083	10071
15.2833	475139	368359	245986	119084	10076
15.2917	475140	368603	246177	119082	10079
15.3	475137	368865	246380	119076	10080
15.3083	475136	369142	246599	119076	10081
15.3167	475137	369435	246828	119078	10082
15.325	475143	369743	247067	119078	10085
15.3333	475150	370059	247322	119079	10086
15.3417	475151	370385	247584	119077	10089
15.35	475152	370721	247849	119076	10089
15.3583	475153	371061	248117	119076	10091
15.3667	475153	371402	248385	119082	10095
15.375	475155	371741	248658	119084	10098
15.3833	475157	372078	248934	119086	10100
15.3917	475156	372415	249212	119084	10101
15.4	475158	372745	249486	119081	10102
15.4083	475162	373062	249759	119079	10104
15.4167	475166	373371	250032	119078	10105
15.425	475169	373674	250301	119074	10108
15.4333	475171	373967	250557	119070	10110
15.4417	475171	374248	250808	119068	10111
15.45	475171	374511	251050	119068	10113
15.4583	475174	374760	251284	119069	10114
15.4667	475173	374998	251506	119068	10117
15.475	475172	375219	251716	119066	10119
15.4833	475173	375425	251916	119066	10121
15.4917	475176	375615	252105	119068	10124
15.5	475175	375790	252283	119066	10128
15.5083	475174	375949	252448	119064	10132
15.5167	475173	376090	252601	119063	10134
15.525	475173	376214	252742	119059	10138
15.5333	475175	376328	252869	119057	10138
15.5417	475174	376426	252979	119057	10139
15.55	475171	376506	253075	119056	10139
15.5583	475176	376570	253155	119053	10140
15.5667	475182	376617	253218	119053	10144
15.575	475186	376649	253266	119054	10149
15.5833	475185	376663	253301	119057	10156
15.5917	475186	376659	253321	119059	10161
15.6	475186	376638	253323	119061	10164
15.6083	475185	376596	253307	119061	10164
15.6167	475183	376540	253270	119057	10166
15.625	475182	376469	253215	119054	10168
15.6333	475185	376377	253147	119052	10171
15.6417	475190	376269	253062	119051	10176
15.65	475194	376140	252957	119053	10183
15.6583	475195	375990	252840	119054	10187
15.6667	475194	375824	252709	119053	10189
15.675	475196	375640	252564	119053	10190
15.6833	475201	375434	252403	119054	10188
15.6917	475206	375211	252229	119053	10189
15.7	475210	374972	252044	119050	10191
15.7083	475211	374718	251850	119049	10193
15.7167	475211	374454	251648	119052	10196
15.725	475212	374181	251438	119053	10199
15.7333	475215	373902	251223	119052	10203
15.7417	475219	373613	251001	119050	10206
15.75	475221	373316	250778	119051	10208
15.7583	475223	373018	250553	119056	10209
15.7667	475226	372716	250331	119057	10213
15.775	475229	372411	250113	119057	10218
15.7833	475232	372107	249897	119057	10224
15.7917	475235	371809	249686	119057	10230
15.8	475236	371520	249481	119060	10234
15.8083	475238	371238	249282	119067	10240
15.8167	475238	370965	249092	119071	10243
15.825	475238	370704	248907	119072	10246
15.8333	475243	370454	248730	119073	10248
15.8417	475250	370216	248561	119075	10253
15.85	475254	369989	248401	119075	10259
15.8583	475256	369776	248249	119076	10262
15.8667	475258	369572	248108	119079	10269
15.875	475261	369384	247977	119083	10275
15.8833	475266	369210	247857	119083	10282
15.8917	475273	369044	247743	119085	10284
15.9	475278	368891	247639	119086	10288
15.9083	475282	368748	247542	119089	10292
15.9167	475285	368614	247454	119089	10296
15.925	475289	368485	247371	119088	10297
15.9333	475297	368363	247294	119088	10299
15.9417	475304	368248	247219	119091	10301
15.95	475311	368140	247151	119095	10305
15.9583	475315	368039	247086	119099	10307
15.9667	475320	367941	247023	119103	10313
15.975	475323	367844	246962	119107	10321
15.9833	475330	367750	246900	119109	10328
15.9917	475339	367653	246841	119113	10333
16	475344	367559	246783	119118	10340
16.0083	475345	367462	246725	119123	10344
16.0167	475349	367363	246669	119126	10347
16.025	475354	367262	246609	119131	10350
16.0333	475361	367159	246546	119137	10356
16.0417	475367	367053	246478	119145	10362
16.05	475370	366945	246405	119151	10366
16.0583	475374	366832	246329	119160	10369
16.0667	475381	366712	246251	119167	10376
16.075	475391	366590	246172	119173	10384
16.0833	475403	366465	246084	119180	10392
16.0917	475414	366335	245993	119187	10397
16.1	475425	366203	245898	119196	10403
16.1083	475436	366065	245797	119205	10411
16.1167	475446	365928	245693	119213	10420
16.125	475456	365787	245589	119222	10428
16.1333	475468	365644	245480	119229	10434
16.1417	475480	365495	245367	119236	10440
16.15	475493	365345	245252	119245	10445
16.1583	475502	365194	245134	119254	10452
16.1667	475513	365042	245013	119264	10458
16.175	475527	364886	244892	119275	10463
16.1833	475539	364730	244769	119284	10468
16.1917	475553	364574	244642	119297	10475
16.2	475567	364419	244513	119308	10484
16.2083	475583	364270	244381	119316	10490
16.2167	475600	364122	244250	119324	10498
16.225	475615	363971	244123	119337	10506
16.2333	475628	363821	243994	119348	10512
16.2417	475642	363676	243866	119357	10516
16.25	475657	363530	243740	119365	10519
16.2583	475673	363387	243612	119375	10523
16.2667	475691	363250	243484	119385	10526
16.275	475705	363114	243361	119394	10531
16.2833	475720	362981	243241	119405	10537
16.2917	475739	362848	243127	119415	10541
16.3	475758	362719	243011	119426	10551
16.3083	475776	362594	242896	119437	10559
16.3167	475794	362471	242782	119449	10567
16.325	475810	362348	242669	119455	10574
16.3333	475827	362230	242554	119460	10580
16.3417	475842	362113	242444	119471	10586
16.35	475858	362000	242336	119481	10592
16.3583	475875	361890	242230	119488	10598
16.3667	475886	361784	242128	119494	10602
16.375	475899	361681	242026	119501	10610
16.3833	475912	361580	241928	119505	10619
16.3917	475923	361481	241832	119509	10622
16.4	475938	361386	241740	119517	10627
16.4083	475952	361292	241648	119526	10636
16.4167	475966	361200	241556	119537	10642
16.425	475977	361110	241466	119544	10649
16.4333	475988	361022	241377	119551	10658
16.4417	476002	360934	241295	119558	10669
16.45	476016	360848	241213	119564	10678
16.4583	476029	360767	241133	119570	10683
16.4667	476046	360687	241057	119575	10689
16.475	476059	360610	240985	119583	10695
16.4833	476068	360533	240913	119592	10702
16.4917	476077	360462	240842	119598	10710
16.5	476085	360393	240773	119605	10719
16.5083	476095	360326	240707	119611	10729
16.5167	476110	360260	240643	119618	10739
16.525	476121	360194	240583	119624	10748
16.5333	476129	360129	240526	119632	10753
16.5417	476135	360069	240470	119641	10759
16.55	476143	360011	240419	119650	10768
16.5583	476153	359956	240370	119659	10777
16.5667	476161	359906	240320	119668	10788
16.575	476171	359857	240273	119676	10797
16.5833	476183	359811	240230	119684	10805
16.5917	476193	359771	240188	119689	10811
16.6	476204	359734	240150	119697	10818
16.6083	476215	359699	240114	119709	10827
16.6167	476227	359666	240080	119718	10833
16.625	476236	359640	240050	119725	10840
16.6333	476245	359620	240023	119731	10846
16.6417	476252	359605	240001	119738	10855
16.65	476259	359596	239987	119746	10865
[truncated: 16,002 more rows]
