# Supplementary material for: Defective lytic transglycosylase disrupts cell morphogenesis by hindering cell wall de-O-acetylation in Neisseria meningitidis
Source: eLife. 2020 Feb 5;9:e51247. doi: 10.7554/eLife.51247 (PMC7083599; doi:10.7554/eLife.51247)
Supplement: Figure 5—source data 2. [file elife-51247-fig5-data2.xlsx]

## Sheet: Figure 5c
	Time	Ape1															LtgA-Ape1															LtgA															D
0	0	0.0382	-0.0178	-0.0138	-0.0048	-0.0038	0.0002	0.0092	-0.0038	-0.0048	0.0182	-0.0048	-0.0058	0.0112	0.0042	-0.0008	-0.0218	-0.0338	-0.0078	0.0022	0.0022	0.0052	0.0032	-0.0098	0.0002	-0.0178	0.0012	-0.0028	-0.0108	0.0112	0.0102	-0.0118	-0.0228	-0.0138	-0.0128	-0.0158	-0.0148	-0.0178	-0.0188	-0.0158	-0.0098	-0.0088	-0.0098	-0.0038	-0.0068	-0.0048	-0,00980000000000003*	-0,00780000000000003*	-0,00580000000000003*
2	2	0.0436667	-0.0153333	-0.00933333	-0.00533333	0.000666667	0.00266667	0.0136667	-0.00133333	-0.00433333	0.0196667	-0.00133333	-0.00333333	0.0156667	0.00666667	0.000666667	-0.0123333	-0.0273333	0.00266667	0.0116667	0.00866667	0.0146667	0.00966667	-0.00333333	0.00466667	-0.0143333	0.00266667	-0.000333333	-0.00533333	0.0196667	0.0196667	-0.00733333	-0.0183333	-0.0103333	-0.00933333	-0.0143333	-0.0103333	-0.0153333	-0.0193333	-0.0183333	-0.0143333	-0.0123333	-0.0123333	-0.00133333	-0.00533333	-0.00533333	-0,00533333333333336*	-0,00533333333333336*	-0,00233333333333335*
4	4	0.044	-0.011	-0.007	0	0.006	0.006	0.012	-0.002	-0.005	0.022	-0.003	-0.001	0.017	0.008	0.002	-0.003	-0.024	0.01	0.023	0.02	0.02	0.019	0.004	0.015	-0.006	0.011	0.007	0	0.026	0.029	-0.001	-0.017	-0.007	-0.011	-0.013	-0.013	-0.017	-0.022	-0.018	-0.011	-0.014	-0.014	-0.003	-0.005	-0.004	-0,00700000000000001*	-0,00600000000000001*	-0,002*
6	6	0.0438667	-0.0101333	-0.00613333	0.000866667	0.00386667	0.00486667	0.0108667	-0.00213333	-0.00413333	0.0188667	-0.00413333	-0.00213333	0.0178667	0.00686667	0.00386667	-0.00113333	-0.0171333	0.0218667	0.0288667	0.0238667	0.0268667	0.0288667	0.00986667	0.0238667	-0.00413333	0.0138667	0.00786667	0.00386667	0.0288667	0.0338667	-0.00813333	-0.0181333	-0.0121333	-0.0111333	-0.0131333	-0.0161333	-0.0181333	-0.0241333	-0.0191333	-0.0141333	-0.0141333	-0.0161333	-0.00513333	-0.00613333	-0.00713333	-0,00713333333333332*	-0,000133333333333319*	0,00486666666666669*
8	8	0.0504667	-0.00453333	-0.00453333	0.00346667	0.00646667	0.00846667	0.0124667	-0.000533333	-0.00153333	0.0194667	-0.00253333	0.00246667	0.0204667	0.0114667	0.00646667	0.00546667	-0.0155333	0.0224667	0.0394667	0.0334667	0.0344667	0.0404667	0.0174667	0.0354667	0.00446667	0.0234667	0.0194667	0.0104667	0.0424667	0.0484667	-0.00753333	-0.0155333	-0.00953333	-0.00953333	-0.0125333	-0.0145333	-0.0185333	-0.0225333	-0.0165333	-0.00953333	-0.00953333	-0.0135333	0.000466667	-0.00153333	-0.00253333	-0,00753333333333336*	-0,00353333333333336*	-0,000533333333333358*
10	10	0.0493333	-0.00566667	-0.00166667	0.00133333	0.00633333	0.00933333	0.0113333	-0.000666667	0.00133333	0.0113333	-0.00466667	0.00233333	0.0213333	0.0103333	0.0103333	0.0103333	-0.00966667	0.0303333	0.0463333	0.0383333	0.0413333	0.0503333	0.0273333	0.0413333	0.0113333	0.0323333	0.0253333	0.0193333	0.0453333	0.0583333	-0.0126667	-0.0196667	-0.0126667	-0.00966667	-0.0116667	-0.0146667	-0.0176667	-0.0226667	-0.0186667	-0.0106667	-0.0106667	-0.0166667	-0.000666667	-0.00266667	-0.00266667	-0,00766666666666668*	-0,00166666666666668*	-0,000666666666666677*
12	12	0.0517333	-0.00226667	-0.00226667	0.00473333	0.00973333	0.0107333	0.0137333	0.00373333	0.00373333	0.0117333	-0.00126667	0.00173333	0.0247333	0.0147333	0.0137333	0.0197333	-0.00926667	0.0377333	0.0607333	0.0477333	0.0507333	0.0607333	0.0377333	0.0577333	0.0177333	0.0387333	0.0337333	0.0217333	0.0577333	0.0677333	-0.00826667	-0.0182667	-0.00526667	-0.00826667	-0.0132667	-0.0112667	-0.0162667	-0.0212667	-0.0192667	-0.0112667	-0.00826667	-0.0122667	-0.000266667	-0.00526667	-0.00326667	-0,00726666666666667*	-0,00826666666666667*	0,00173333333333334*
14	14	0.0531333	-0.00386667	0.00213333	0.00213333	0.0111333	0.0101333	0.0151333	0.00313333	0.00313333	0.0131333	0.00313333	0.00713333	0.0311333	0.0171333	0.0171333	0.0241333	-0.00886667	0.0481333	0.0671333	0.0541333	0.0591333	0.0701333	0.0451333	0.0671333	0.0221333	0.0481333	0.0401333	0.0341333	0.0661333	0.0781333	-0.00786667	-0.0198667	-0.0138667	-0.00786667	-0.0128667	-0.0118667	-0.0178667	-0.0218667	-0.0148667	-0.0118667	-0.0118667	-0.0118667	0.00113333	-0.00386667	0.00113333	-0,00886666666666666*	-0,00786666666666666*	-0,00486666666666666*
16	16	0.0554667	0.000466667	0.00146667	0.00546667	0.0144667	0.0104667	0.0154667	0.00446667	0.00446667	0.00946667	0.00146667	0.00746667	0.0324667	0.0184667	0.0174667	0.0294667	-0.00153333	0.0514667	0.0774667	0.0634667	0.0644667	0.0824667	0.0554667	0.0784667	0.0294667	0.0534667	0.0444667	0.0384667	0.0744667	0.0884667	-0.00853333	-0.0165333	-0.0105333	-0.0105333	-0.0115333	-0.0135333	-0.0175333	-0.0235333	-0.0175333	-0.00853333	-0.00253333	-0.0105333	-0.00153333	-0.00253333	-0.000533333	-0,00853333333333331*	-0,00653333333333331*	-0,000533333333333302*
18	18	0.0552	0.0012	0.0022	0.0042	0.0162	0.0152	0.0192	0.0072	0.0092	0.0142	0.0052	0.0062	0.0332	0.0222	0.0192	0.0372	-0.0008	0.0592	0.0882	0.0702	0.0742	0.0932	0.0632	0.0892	0.0382	0.0632	0.0522	0.0472	0.0832	0.0962	-0.0088	-0.0178	-0.0088	-0.0128	-0.0138	-0.0128	-0.0168	-0.0218	-0.0178	-0.0108	-0.0008	-0.0128	0.0002	-0.0028	-0.0018	-0,00579999999999997*	-0,00679999999999997*	-0,00279999999999997*
20	20	0.0529333	0.00393333	0.00693333	0.00293333	0.0179333	0.0159333	0.0219333	0.00693333	0.00993333	0.0169333	0.00693333	0.00793333	0.0359333	0.0209333	0.0239333	0.0449333	0.00293333	0.0709333	0.0969333	0.0799333	0.0829333	0.101933	0.0749333	0.0999333	0.0419333	0.0699333	0.0619333	0.0539333	0.0879333	0.106933	-0.00906667	-0.0180667	-0.00906667	-0.00806667	-0.0130667	-0.0120667	-0.0150667	-0.0200667	-0.0180667	-0.00806667	-0.00406667	-0.0160667	-0.00106667	-0.00206667	-0.00106667	-0,00706666666666669*	-0,00506666666666669*	-0,00106666666666669*
22	22	0.0472	0.0002	0.0032	0.0042	0.0192	0.0182	0.0212	0.0082	0.0122	0.0172	0.0042	0.0132	0.0372	0.0232	0.0262	0.0492	0.0062	0.0802	0.1052	0.0862	0.0902	0.1132	0.0822	0.1102	0.0482	0.0772	0.0662	0.0632	0.0982	0.1172	-0.0078	-0.0228	-0.0108	-0.0098	-0.0108	-0.0128	-0.0208	-0.0198	-0.0168	-0.0118	-0.0068	-0.0138	-0.0008	-0.0028	0.0002	-0,00880000000000003*	-0,00680000000000003*	0,00019999999999995*
24	24	0.0472667	-0.000733333	0.00426667	0.00526667	0.0192667	0.0172667	0.0182667	0.00826667	0.0162667	0.0142667	0.00526667	0.0102667	0.0392667	0.0232667	0.0272667	0.0552667	0.00626667	0.0792667	0.116267	0.0912667	0.0982667	0.121267	0.0912667	0.117267	0.0572667	0.0822667	0.0762667	0.0672667	0.105267	0.125267	-0.0107333	-0.0197333	-0.0127333	-0.0107333	-0.0127333	-0.0137333	-0.0187333	-0.0237333	-0.0167333	-0.0107333	-0.00973333	-0.0127333	-0.000733333	-0.00473333	0.000266667	-0,00973333333333337*	-0,0067333333333334*	-0,00173333333333339*
26	26	0.0447333	0.00473333	0.00873333	0.00673333	0.0227333	0.0177333	0.0187333	0.00773333	0.0167333	0.0167333	0.00873333	0.0147333	0.0387333	0.0257333	0.0307333	0.0597333	0.00973333	0.0897333	0.123733	0.100733	0.104733	0.134733	0.0987333	0.129733	0.0607333	0.0917333	0.0807333	0.0737333	0.115733	0.135733	-0.0122667	-0.0232667	-0.0132667	-0.0112667	-0.0132667	-0.0122667	-0.0202667	-0.0222667	-0.0192667	-0.0122667	-0.00726667	-0.0162667	-0.00226667	-0.00126667	-0.000266667	-0,00726666666666667*	-0,00626666666666667*	-0,000266666666666665*
30	30	0.0444667	0.00646667	0.00846667	0.00846667	0.0254667	0.0214667	0.0214667	0.0114667	0.0174667	0.0204667	0.00946667	0.0184667	0.0414667	0.0294667	0.0324667	0.0724667	0.0164667	0.0944667	0.133467	0.110467	0.114467	0.143467	0.111467	0.137467	0.0694667	0.0964667	0.0874667	0.0804667	0.124467	0.145467	-0.0115333	-0.0205333	-0.0115333	-0.00953333	-0.0125333	-0.0115333	-0.0175333	-0.0215333	-0.0175333	-0.0115333	-0.00953333	-0.0135333	0.000466667	-0.00353333	0.00246667	-0,00953333333333337*	-0,00653333333333336*	-0,000533333333333358*
32	32	0.0444667	0.00446667	0.00846667	0.00646667	0.0244667	0.0214667	0.0194667	0.0124667	0.0174667	0.0194667	0.00746667	0.0154667	0.0434667	0.0304667	0.0324667	0.0694667	0.0164667	0.103467	0.141467	0.117467	0.120467	0.154467	0.116467	0.149467	0.0734667	0.104467	0.0964667	0.0854667	0.129467	0.153467	-0.0135333	-0.0215333	-0.0115333	-0.0105333	-0.0125333	-0.0115333	-0.0195333	-0.0215333	-0.0175333	-0.0135333	-0.00753333	-0.0145333	-0.000533333	-0.00253333	0.00146667	-0,00753333333333334*	-0,00553333333333333*	-0,00053333333333333*
34	34	0.0457333	0.00673333	0.00973333	0.0107333	0.0297333	0.0197333	0.0187333	0.0127333	0.0217333	0.0207333	0.00873333	0.0197333	0.0457333	0.0327333	0.0367333	0.0777333	0.0197333	0.108733	0.148733	0.122733	0.127733	0.162733	0.125733	0.157733	0.0787333	0.108733	0.100733	0.0917333	0.136733	0.160733	-0.0102667	-0.0212667	-0.0102667	-0.0102667	-0.0122667	-0.0112667	-0.0232667	-0.0232667	-0.0192667	-0.0142667	-0.00926667	-0.0152667	-0.00226667	-0.00226667	-0.000266667	-0,0072666666666667*	-0,0032666666666667*	-0,000266666666666693*
36	36	0.0448667	0.00686667	0.00986667	0.0108667	0.0268667	0.0208667	0.0228667	0.0148667	0.0208667	0.0198667	0.0118667	0.0188667	0.0438667	0.0318667	0.0388667	0.0828667	0.0218667	0.116867	0.156867	0.129867	0.136867	0.173867	0.135867	0.166867	0.0838667	0.115867	0.105867	0.0968667	0.141867	0.169867	-0.0141333	-0.0231333	-0.0111333	-0.0101333	-0.0131333	-0.00813333	-0.0201333	-0.0231333	-0.0191333	-0.0161333	-0.0111333	-0.0171333	-0.00413333	-0.00413333	-0.000133333	-0,00713333333333338*	-0,00213333333333338*	0,000866666666666627*
38	38	0.0434667	0.00746667	0.0104667	0.0104667	0.0314667	0.0234667	0.0214667	0.0144667	0.0214667	0.0224667	0.0104667	0.0194667	0.0474667	0.0334667	0.0404667	0.0874667	0.0244667	0.122467	0.167467	0.139467	0.143467	0.182467	0.141467	0.177467	0.0894667	0.122467	0.113467	0.103467	0.151467	0.181467	-0.0125333	-0.0215333	-0.00953333	-0.0115333	-0.0135333	-0.0115333	-0.0215333	-0.0265333	-0.0215333	-0.0165333	-0.0115333	-0.0175333	-0.00253333	-0.00553333	-0.00153333	-0,00653333333333334*	-0,00253333333333333*	0,00246666666666667*
40	40	0.0449333	0.0119333	0.0189333	0.0129333	0.0339333	0.0239333	0.0219333	0.0129333	0.0229333	0.0219333	0.00993333	0.0229333	0.0459333	0.0339333	0.0419333	0.0979333	0.0319333	0.132933	0.172933	0.142933	0.150933	0.191933	0.149933	0.183933	0.0939333	0.127933	0.116933	0.108933	0.155933	0.186933	-0.0100667	-0.0170667	-0.00506667	-0.0120667	-0.0120667	-0.0110667	-0.0210667	-0.0240667	-0.0210667	-0.0170667	-0.0120667	-0.0180667	-0.00306667	-0.00506667	-0.00106667	-0,00606666666666666*	-0,00206666666666666*	0,00193333333333331*
42	42	0.0472667	0.0132667	0.0142667	0.0132667	0.0332667	0.0262667	0.0232667	0.0182667	0.0272667	0.0252667	0.0112667	0.0222667	0.0502667	0.0362667	0.0432667	0.0972667	0.0312667	0.134267	0.183267	0.153267	0.157267	0.199267	0.156267	0.192267	0.0992667	0.132267	0.122267	0.115267	0.167267	0.196267	-0.0137333	-0.0177333	-0.00773333	-0.0107333	-0.0127333	-0.0107333	-0.0207333	-0.0247333	-0.0207333	-0.0187333	-0.0147333	-0.0187333	-0.00473333	-0.00573333	0.000266667	-0,00373333333333331*	-0,00173333333333331*	0,0042666666666667*
44	44	0.0478	0.0138	0.0168	0.0168	0.0398	0.0258	0.0258	0.0178	0.0288	0.0258	0.0108	0.0238	0.0508	0.0398	0.0488	0.1058	0.0368	0.1448	0.1918	0.1578	0.1648	0.2108	0.1638	0.2008	0.1048	0.1398	0.1318	0.1218	0.1718	0.2048	-0.0112	-0.0142	-0.0062	-0.0092	-0.0092	-0.0062	-0.0222	-0.0242	-0.0202	-0.0182	-0.0122	-0.0192	-0.0032	-0.0042	-0.0012	-0,00520000000000001*	-0,00120000000000001*	0,0038*
46	46	0.0476	0.0146	0.0166	0.0166	0.0396	0.0276	0.0246	0.0186	0.0316	0.0266	0.0126	0.0256	0.0496	0.0396	0.0496	0.1096	0.0416	0.1506	0.1996	0.1656	0.1726	0.2166	0.1746	0.2096	0.1116	0.1456	0.1326	0.1276	0.1776	0.2106	-0.0124	-0.0174	-0.0054	-0.0064	-0.0104	-0.0064	-0.0244	-0.0224	-0.0204	-0.0174	-0.0144	-0.0174	-0.0034	-0.0054	0.0006	-0,000399999999999984*	0,000600000000000017*	0,00360000000000002*
48	48	0.0499333	0.0189333	0.0179333	0.0189333	0.0399333	0.0299333	0.0259333	0.0209333	0.0309333	0.0269333	0.0129333	0.0249333	0.0519333	0.0429333	0.0499333	0.114933	0.0429333	0.152933	0.205933	0.173933	0.179933	0.225933	0.179933	0.213933	0.112933	0.153933	0.140933	0.131933	0.184933	0.218933	-0.0140667	-0.0190667	-0.00206667	-0.0100667	-0.0100667	-0.00706667	-0.0230667	-0.0250667	-0.0220667	-0.0220667	-0.0130667	-0.0170667	-0.00306667	-0.00506667	-0.00106667	-0,00206666666666672*	0,00193333333333329*	0,00393333333333329*
50	50	0.0487333	0.0187333	0.0207333	0.0207333	0.0437333	0.0307333	0.0267333	0.0217333	0.0357333	0.0287333	0.0177333	0.0277333	0.0537333	0.0437333	0.0537333	0.119733	0.0477333	0.160733	0.212733	0.177733	0.184733	0.234733	0.187733	0.224733	0.120733	0.158733	0.147733	0.137733	0.192733	0.227733	-0.0122667	-0.0162667	-0.00626667	-0.0112667	-0.00826667	-0.00726667	-0.0232667	-0.0242667	-0.0202667	-0.0192667	-0.0122667	-0.0202667	-0.00226667	-0.00326667	-0.000266667	-0,00126666666666669*	0,000733333333333308*	0,00573333333333331*
52	52	0.0538667	0.0198667	0.0208667	0.0218667	0.0448667	0.0308667	0.0288667	0.0238667	0.0388667	0.0298667	0.0148667	0.0278667	0.0568667	0.0458667	0.0568667	0.125867	0.0508667	0.166867	0.219867	0.185867	0.195867	0.243867	0.193867	0.232867	0.124867	0.162867	0.153867	0.144867	0.198867	0.236867	-0.0111333	-0.0141333	-0.00313333	-0.00513333	-0.00713333	-0.00213333	-0.0231333	-0.0251333	-0.0181333	-0.0181333	-0.0111333	-0.0161333	-0.00213333	-0.00213333	0.000866667	-0,00113333333333332*	0,000866666666666682*	0,00686666666666669*
54	54	0.0526667	0.0206667	0.0216667	0.0206667	0.0436667	0.0326667	0.0286667	0.0226667	0.0376667	0.0286667	0.0166667	0.0276667	0.0586667	0.0436667	0.0556667	0.129667	0.0536667	0.171667	0.226667	0.191667	0.197667	0.249667	0.199667	0.238667	0.128667	0.168667	0.154667	0.148667	0.204667	0.240667	-0.0123333	-0.0163333	-0.00533333	-0.00733333	-0.00533333	-0.00233333	-0.0233333	-0.0253333	-0.0223333	-0.0213333	-0.0163333	-0.0213333	-0.00533333	-0.00433333	-0.00333333	-0,00233333333333341*	0,00166666666666659*	0,0086666666666666*
56	56	0.0561333	0.0241333	0.0271333	0.0271333	0.0471333	0.0391333	0.0331333	0.0251333	0.0441333	0.0341333	0.0191333	0.0321333	0.0631333	0.0491333	0.0611333	0.134133	0.0601333	0.176133	0.234133	0.200133	0.208133	0.260133	0.211133	0.247133	0.134133	0.176133	0.162133	0.155133	0.214133	0.249133	-0.00986667	-0.0138667	-0.00186667	-0.00886667	-0.00786667	-0.00286667	-0.0218667	-0.0218667	-0.0198667	-0.0208667	-0.0148667	-0.0188667	-0.00286667	0.000133333	0.000133333	-0,00186666666666668*	0,00213333333333332*	0,00713333333333332*
58	58	0.0588667	0.0258667	0.0268667	0.0268667	0.0488667	0.0368667	0.0318667	0.0258667	0.0438667	0.0338667	0.0198667	0.0308667	0.0618667	0.0498667	0.0628667	0.140867	0.0648667	0.184867	0.242867	0.205867	0.215867	0.268867	0.219867	0.254867	0.141867	0.182867	0.168867	0.158867	0.219867	0.254867	-0.00913333	-0.0131333	-0.00213333	-0.00413333	-0.00513333	-0.00313333	-0.0221333	-0.0221333	-0.0191333	-0.0181333	-0.0121333	-0.0191333	-0.000133333	-0.00113333	-0.000133333	-0,00213333333333332*	0,00286666666666668*	0,00786666666666669*
	60	0.0606667	0.0276667	0.0296667	0.0296667	0.0526667	0.0336667	0.0336667	0.0256667	0.0446667	0.0356667	0.0196667	0.0356667	0.0636667	0.0516667	0.0656667	0.143667	0.0696667	0.189667	0.243667	0.209667	0.217667	0.274667	0.224667	0.261667	0.143667	0.187667	0.173667	0.163667	0.224667	0.262667	-0.00933333	-0.00933333	0.000666667	-0.00433333	-0.00333333	0.00466667	-0.0213333	-0.0223333	-0.0173333	-0.0183333	-0.00933333	-0.0153333	0.000666667	0.00266667	0.00366667	0,00166666666666671*	0,00366666666666671*	0,0106666666666667*
[truncated: 12 more columns]
