# Supplementary material for: Defective lytic transglycosylase disrupts cell morphogenesis by hindering cell wall de-O-acetylation in Neisseria meningitidis
Source: eLife. 2020 Feb 5;9:e51247. doi: 10.7554/eLife.51247 (PMC7083599; doi:10.7554/eLife.51247)
Supplement: Figure 6—source data 1. [file elife-51247-fig6-data1.xlsx]

## Sheet: Figure 6a
	Wild-type					ΔltgA					ΔltgAltgA					ΔltgAltgAΔ30
Input	10000000	10000000	10000000	10000000	10000000	9000000	9000000	9000000	9000000	9000000	12000000	12000000	12000000	12000000	12000000	8900000	8900000	8900000	8900000	8900000
2h pi	10000000	4600000	6600000	4600000	6600000	18300000	9000000	6300000	7400000	11200000	13100000	14400000	10000000	7500000	11200000	4500000	1400000	3900000	3600000	1100000
6h pi	9400000	6000000	2300000	6000000	2300000	12900000	7400000	11700000	11500000	23000000	19800000	4100000	25000000	10200000	9800000	270000	700	500000	310000	200
24h pi	100	100	100	100	100	21000	1200	7400	200000	550000	100	400	100	600	200	100	100	100	100	100
Within each row, compare columns (simple effects within rows)
Number of families	4
Number of comparisons per family	3
Alpha	0.001
Dunnett's multiple comparisons test	Mean Diff.	99.9% CI of diff.	Significant?	Summary
Input
Wild-type vs. ltgA	1000000	-6.600e+006 to 8.600e+006	No	ns
Wild-type vs. ltgAltgA	-2000000	-9.600e+006 to 5.600e+006	No	ns
Wild-type vs. ltgAltgA30	1100000	-6.500e+006 to 8.700e+006	No	ns
2h pi
Wild-type vs. ltgA	-3960000	-1.156e+007 to 3.640e+006	No	ns
Wild-type vs. ltgAltgA	-4760000	-1.236e+007 to 2.840e+006	No	*
Wild-type vs. ltgAltgA30	3580000	-4.020e+006 to 1.118e+007	No	ns
6h pi
Wild-type vs. ltgA	-8100000	-1.570e+007 to -499597	Yes	***
Wild-type vs. ltgAltgA	-8580000	-1.618e+007 to -979597	Yes	***
Wild-type vs. ltgAltgA30	4984000	-2.617e+006 to 1.258e+007	No	*
24h pi
Wild-type vs. ltgA	-155820	-7.756e+006 to 7.445e+006	No	ns
Wild-type vs. ltgAltgA	-180	-7.601e+006 to 7.600e+006	No	ns
Wild-type vs. ltgAltgA30	0	-7.600e+006 to 7.600e+006	No	ns
Test details	Mean 1	Mean 2	Mean Diff.	SE of diff.	N1	N2	q	DF
Input
Wild-type vs. ltgA	10000000	9000000	1000000	1920000	5	5	0.5208	36
Wild-type vs. ltgAltgA	10000000	12000000	-2000000	1920000	5	5	1.042	36
Wild-type vs. ltgAltgA30	10000000	8900000	1100000	1920000	5	5	0.5728	36
2h pi
Wild-type vs. ltgA	6480000	10440000	-3960000	1920000	5	5	2.062	36
Wild-type vs. ltgAltgA	6480000	11240000	-4760000	1920000	5	5	2.479	36
Wild-type vs. ltgAltgA30	6480000	2900000	3580000	1920000	5	5	1.864	36
6h pi
Wild-type vs. ltgA	5200000	13300000	-8100000	1920000	5	5	4.218	36
Wild-type vs. ltgAltgA	5200000	13780000	-8580000	1920000	5	5	4.468	36
Wild-type vs. ltgAltgA30	5200000	216180	4984000	1920000	5	5	2.595	36
24h pi
Wild-type vs. ltgA	100	155920	-155820	1920000	5	5	0.08115	36
Wild-type vs. ltgAltgA	100	280	-180	1920000	5	5	9.374e-05	36
Wild-type vs. ltgAltgA30	100	100	0	1920000	5	5	0	36
