# Supplementary material for: Defective lytic transglycosylase disrupts cell morphogenesis by hindering cell wall de-O-acetylation in Neisseria meningitidis
Source: eLife. 2020 Feb 5;9:e51247. doi: 10.7554/eLife.51247 (PMC7083599; doi:10.7554/eLife.51247)
Supplement: Figure 6—source data 2. [file elife-51247-fig6-data2.xlsx]

## Sheet: Figure 6b
	Wild-type					ΔltgA					ΔltgAltgA					ΔltgAltgAΔ30
2h pi	3905.21	3760.13	4322.31			3578.78	3343.03	4122.82	4412.98	4539.92	5972.57	5102.1	5501.06	6045.11	5319.72	4068.42	3306.76	4539.92	4848.21	3705.72
6h pi	16599.5	18195.4	15185			22729.1	18249.8	24760.2	23454.5	21822.3	23454.5	20317.2	26555.5	26174.7	22366.4	8420.76	5573.6	9128.01	8964.81	6933.71
24h pi	1565.82	1094.32	2055.46			1511.42	604.681	912.971	2980.33	3687.59	1547.69	2273.08	1148.72	2001.06	1039.91	0	0	0	0	0
Within each row, compare columns (simple effects within rows)
Number of families	3
Number of comparisons per family	3
Alpha	0.001
Dunnett's multiple comparisons test	Mean Diff.	99.9% CI of diff.	Significant?	Summary
2h pi
Wild-type vs. ltgA	14.51	-2823 to 2852	No	ns
Wild-type vs. ltgAltgA	-1574	-4412 to 1263	No	ns
Wild-type vs. ltgAltgA30	-79.79	-2917 to 2758	No	ns
6h pi
Wild-type vs. ltgA	-5531	-8369 to -2694	Yes	****
Wild-type vs. ltgAltgA	-7102	-9939 to -4264	Yes	****
Wild-type vs. ltgAltgA30	8868	6030 to 11705	Yes	****
24h pi
Wild-type vs. ltgA	-366.3	-3204 to 2471	No	ns
Wild-type vs. ltgAltgA	-29.02	-2866 to 2808	No	ns
Wild-type vs. ltgAltgA30	1573	-1264 to 4411	No	ns
Test details	Mean 1	Mean 2	Mean Diff.	SE of diff.	N1	N2	q	DF
2h pi
Wild-type vs. ltgA	4014	4000	14.51	682.1	5	5	0.02127	24
Wild-type vs. ltgAltgA	4014	5588	-1574	682.1	5	5	2.308	24
Wild-type vs. ltgAltgA30	4014	4094	-79.79	682.1	5	5	0.117	24
6h pi
Wild-type vs. ltgA	16672	22203	-5531	682.1	5	5	8.109	24
Wild-type vs. ltgAltgA	16672	23774	-7102	682.1	5	5	10.41	24
Wild-type vs. ltgAltgA30	16672	7804	8868	682.1	5	5	13	24
24h pi
Wild-type vs. ltgA	1573	1939	-366.3	682.1	5	5	0.537	24
Wild-type vs. ltgAltgA	1573	1602	-29.02	682.1	5	5	0.04254	24
Wild-type vs. ltgAltgA30	1573	0	1573	682.1	5	5	2.306	24

## Sheet: Kc blood
	Wild-type					ΔltgA					ΔltgAltgA					ΔltgAltgAΔ30
2h pi	1750	2010	1455			1449	2310	1216	1197	1248	3004	4145	2456	2377	3215	1617	2033	1858	1401	1622
6h pi	3249	3433	3112			3468	4158	3176	3217	3619	3410	4510	3500	3103	3412	1082	1543	977	913	889
24h pi	0	0	0			0	0	0	0	0	380	0	112	410	316	0	0	0	0	0
Within each row, compare columns (simple effects within rows)
Number of families	3
Number of comparisons per family	3
Alpha	0.001
Dunnett's multiple comparisons test	Mean Diff.	99.9% CI of diff.	Significant?	Summary
2h pi
Wild-type vs. ltgA	252	-326.6 to 830.6	No	ns
Wild-type vs. ltgAltgA	-1303	-1882 to -724.8	Yes	****
Wild-type vs. ltgAltgA30	29.8	-548.8 to 608.4	No	ns
6h pi
Wild-type vs. ltgA	-259.8	-838.4 to 318.8	No	ns
Wild-type vs. ltgAltgA	-319.2	-897.8 to 259.4	No	ns
Wild-type vs. ltgAltgA30	2187	1608 to 2766	Yes	****
24h pi
Wild-type vs. ltgA	0	-578.6 to 578.6	No	ns
Wild-type vs. ltgAltgA	-243.6	-822.2 to 335.0	No	ns
Wild-type vs. ltgAltgA30	0	-578.6 to 578.6	No	ns
Test details	Mean 1	Mean 2	Mean Diff.	SE of diff.	N1	N2	q	DF
2h pi
Wild-type vs. ltgA	1736	1484	252	139.1	5	5	1.812	24
Wild-type vs. ltgAltgA	1736	3039	-1303	139.1	5	5	9.371	24
Wild-type vs. ltgAltgA30	1736	1706	29.8	139.1	5	5	0.2142	24
6h pi
Wild-type vs. ltgA	3268	3528	-259.8	139.1	5	5	1.868	24
Wild-type vs. ltgAltgA	3268	3587	-319.2	139.1	5	5	2.295	24
Wild-type vs. ltgAltgA30	3268	1081	2187	139.1	5	5	15.72	24
24h pi
Wild-type vs. ltgA	0	0	0	139.1	5	5	0	24
Wild-type vs. ltgAltgA	0	243.6	-243.6	139.1	5	5	1.751	24
Wild-type vs. ltgAltgA30	0	0	0	139.1	5	5	0	24
