# Supplementary material for: Defective lytic transglycosylase disrupts cell morphogenesis by hindering cell wall de-O-acetylation in Neisseria meningitidis
Source: eLife. 2020 Feb 5;9:e51247. doi: 10.7554/eLife.51247 (PMC7083599; doi:10.7554/eLife.51247)
Supplement: Supplementary file 2. [file elife-51247-supp2.docx]

| **Table 1** Data-collection and [refinement statistics](http://reference.iucr.org/dictionary/Statistics) | | | | | |
| --- | --- | --- | --- | --- | --- |
| Values in parentheses are for the outer shell. | | | | | |
| **Data Collection** | **LtgA** |  |  |  |  |
|  |  |  |  |  |  |
| Data collection | | | | | |
| Wavelength (Å) | 0.9795 |  |  |  |  |
| Resolution range (Å) | 49.84-1.98 (2.067-1.995) |  |  |  |  |
| Space group | *P212121* |  |  |  |  |
| Unit-cell parameters | | | | | |
| *a* (Å) | 66.82 |  |  |  |  |
| *b* (Å) | 72.25 |  |  |  |  |
| *c* (Å) | 122.31 |  |  |  |  |
| 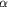 (°),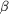 (°),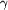 (°) | 90 |  |  |  |  |
|  |  |  |  |  |  |
|  |  |  |  |  |  |
| Total reflections | 299848 |  |  |  |  |
| Unique reflections | 40499 |  |  |  |  |
| Multiplicity | 7.4 (7.4) |  |  |  |  |
| Completeness (%) | 98.63 (94.17) |  |  |  |  |
| Mean *I*/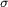(*I*) | 16.40 (1.47) |  |  |  |  |
| Wilson *B* factor (Å2) | 43.22 |  |  |  |  |
| *R*merge[#](http://onlinelibrary.wiley.com/iucr/doi/10.1107/S1399004714000911/mn5048bdy.html#TFN1) | 0.055 (0.063) |  |  |  |  |
| Refinement | | | | | |
| *R* factor[+](http://onlinelibrary.wiley.com/iucr/doi/10.1107/S1399004714000911/mn5048bdy.html#TFN2) | 0.1929(0.3192) |  |  |  |  |
| *R*free | 0.2464(0.3645) |  |  |  |  |
| No. of atoms | 4661 |  |  |  |  |
| No. of waters | 271 |  |  |  |  |
| No. of protein residues | 563 |  |  |  |  |
| R.m.s.d., bonds (Å) | 0.007 |  |  |  |  |
| R.m.s.d., angles (°) | 0.96 |  |  |  |  |
| Ramachandran favored (%) | 98 |  |  |  |  |
| Ramachandran outliers (%) | 0 |  |  |  |  |
| *B* factors (Å2) | | | | | |
| Average | 51.00 |  |  |  |  |
| Macromolecules | 50.80 |  |  |  |  |
| Ligand  Solvent  All-atom clash score | -------  54.60  2.09 |  |  |  |  |
|  |  |  |  |  |  |
|  | | | | | |

†*R*merge = ΣhklΣi∣*I*i(*hkl*) −〈*I* (*hkl*)〉∣/ΣhklΣI *I* (*hkl*)

‡*R*factor = Σhkl |∣*F* obs − *F* calc∣|/Σhkl |*F* obs|

**R*free was computed identically except that all reflections belonged to a test set consisting of a 10% random selection of the data.
