# Supplementary figures and images for: Defective lytic transglycosylase disrupts cell morphogenesis by hindering cell wall de-O-acetylation in Neisseria meningitidis
Source: eLife journal article supplement (doi:10.7554/elife.51247), 2020-02-05

**
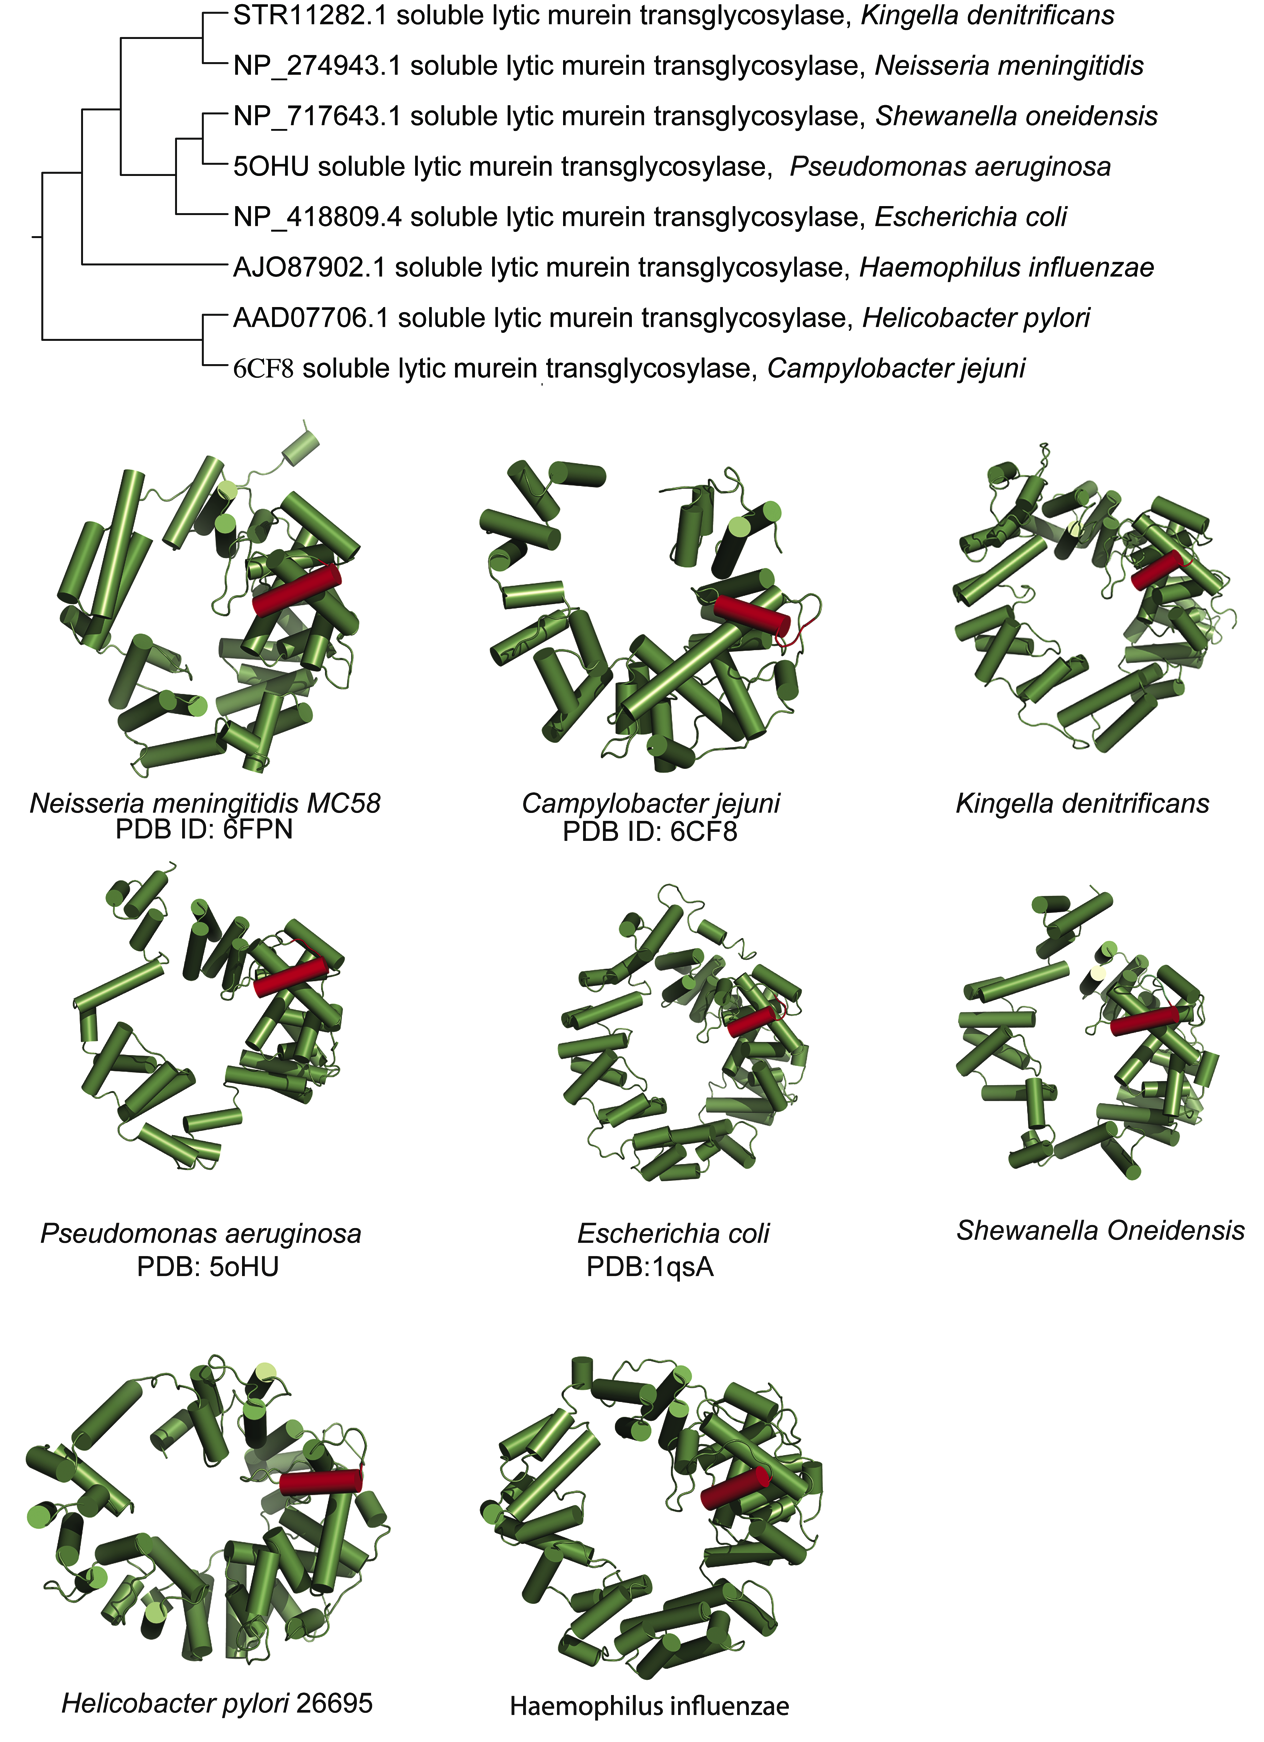
**

Supplement: supp [file elife_poa_e51247_Figure_1_figure_supplement_1.docx]

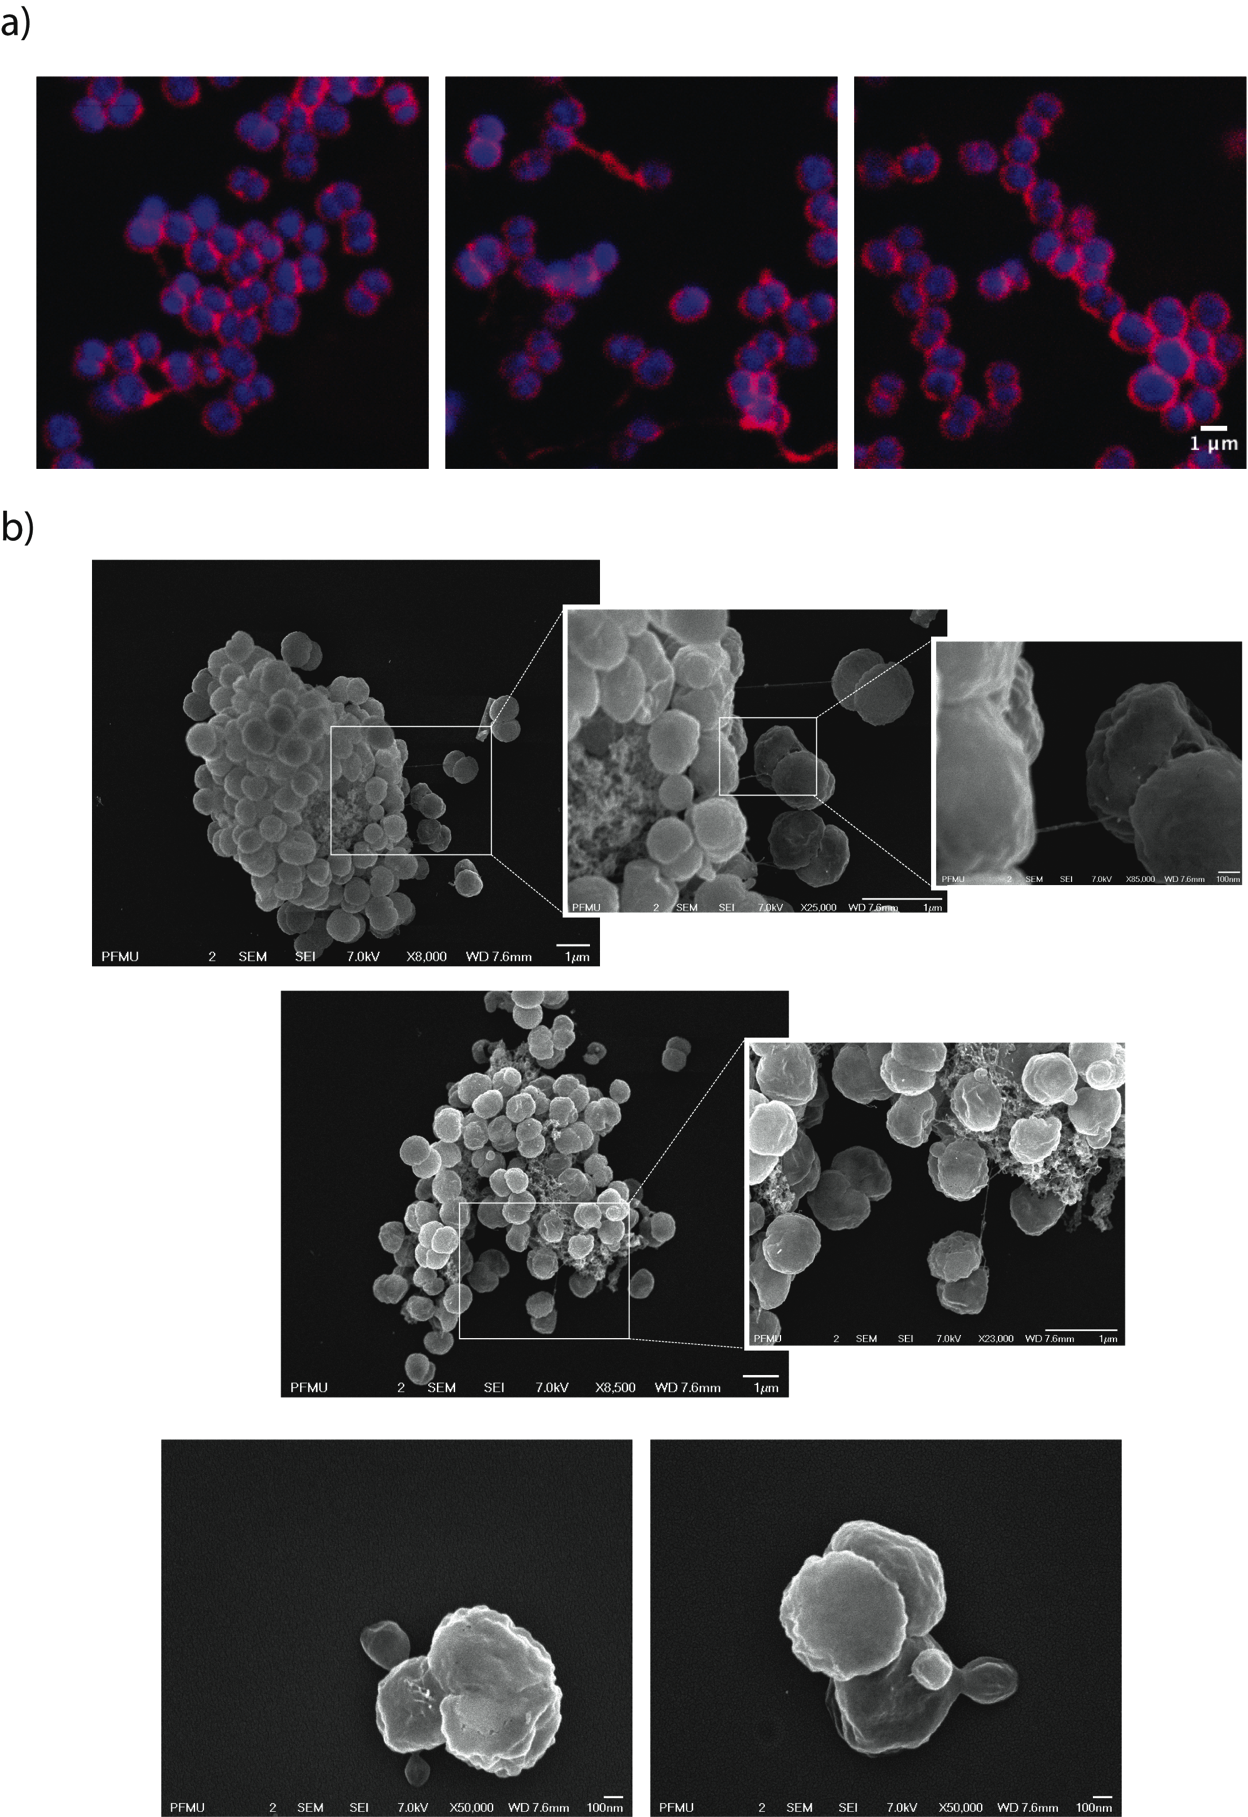

Supplement: supp [file elife_poa_e51247_Figure_3_figure_supplement_1.docx]

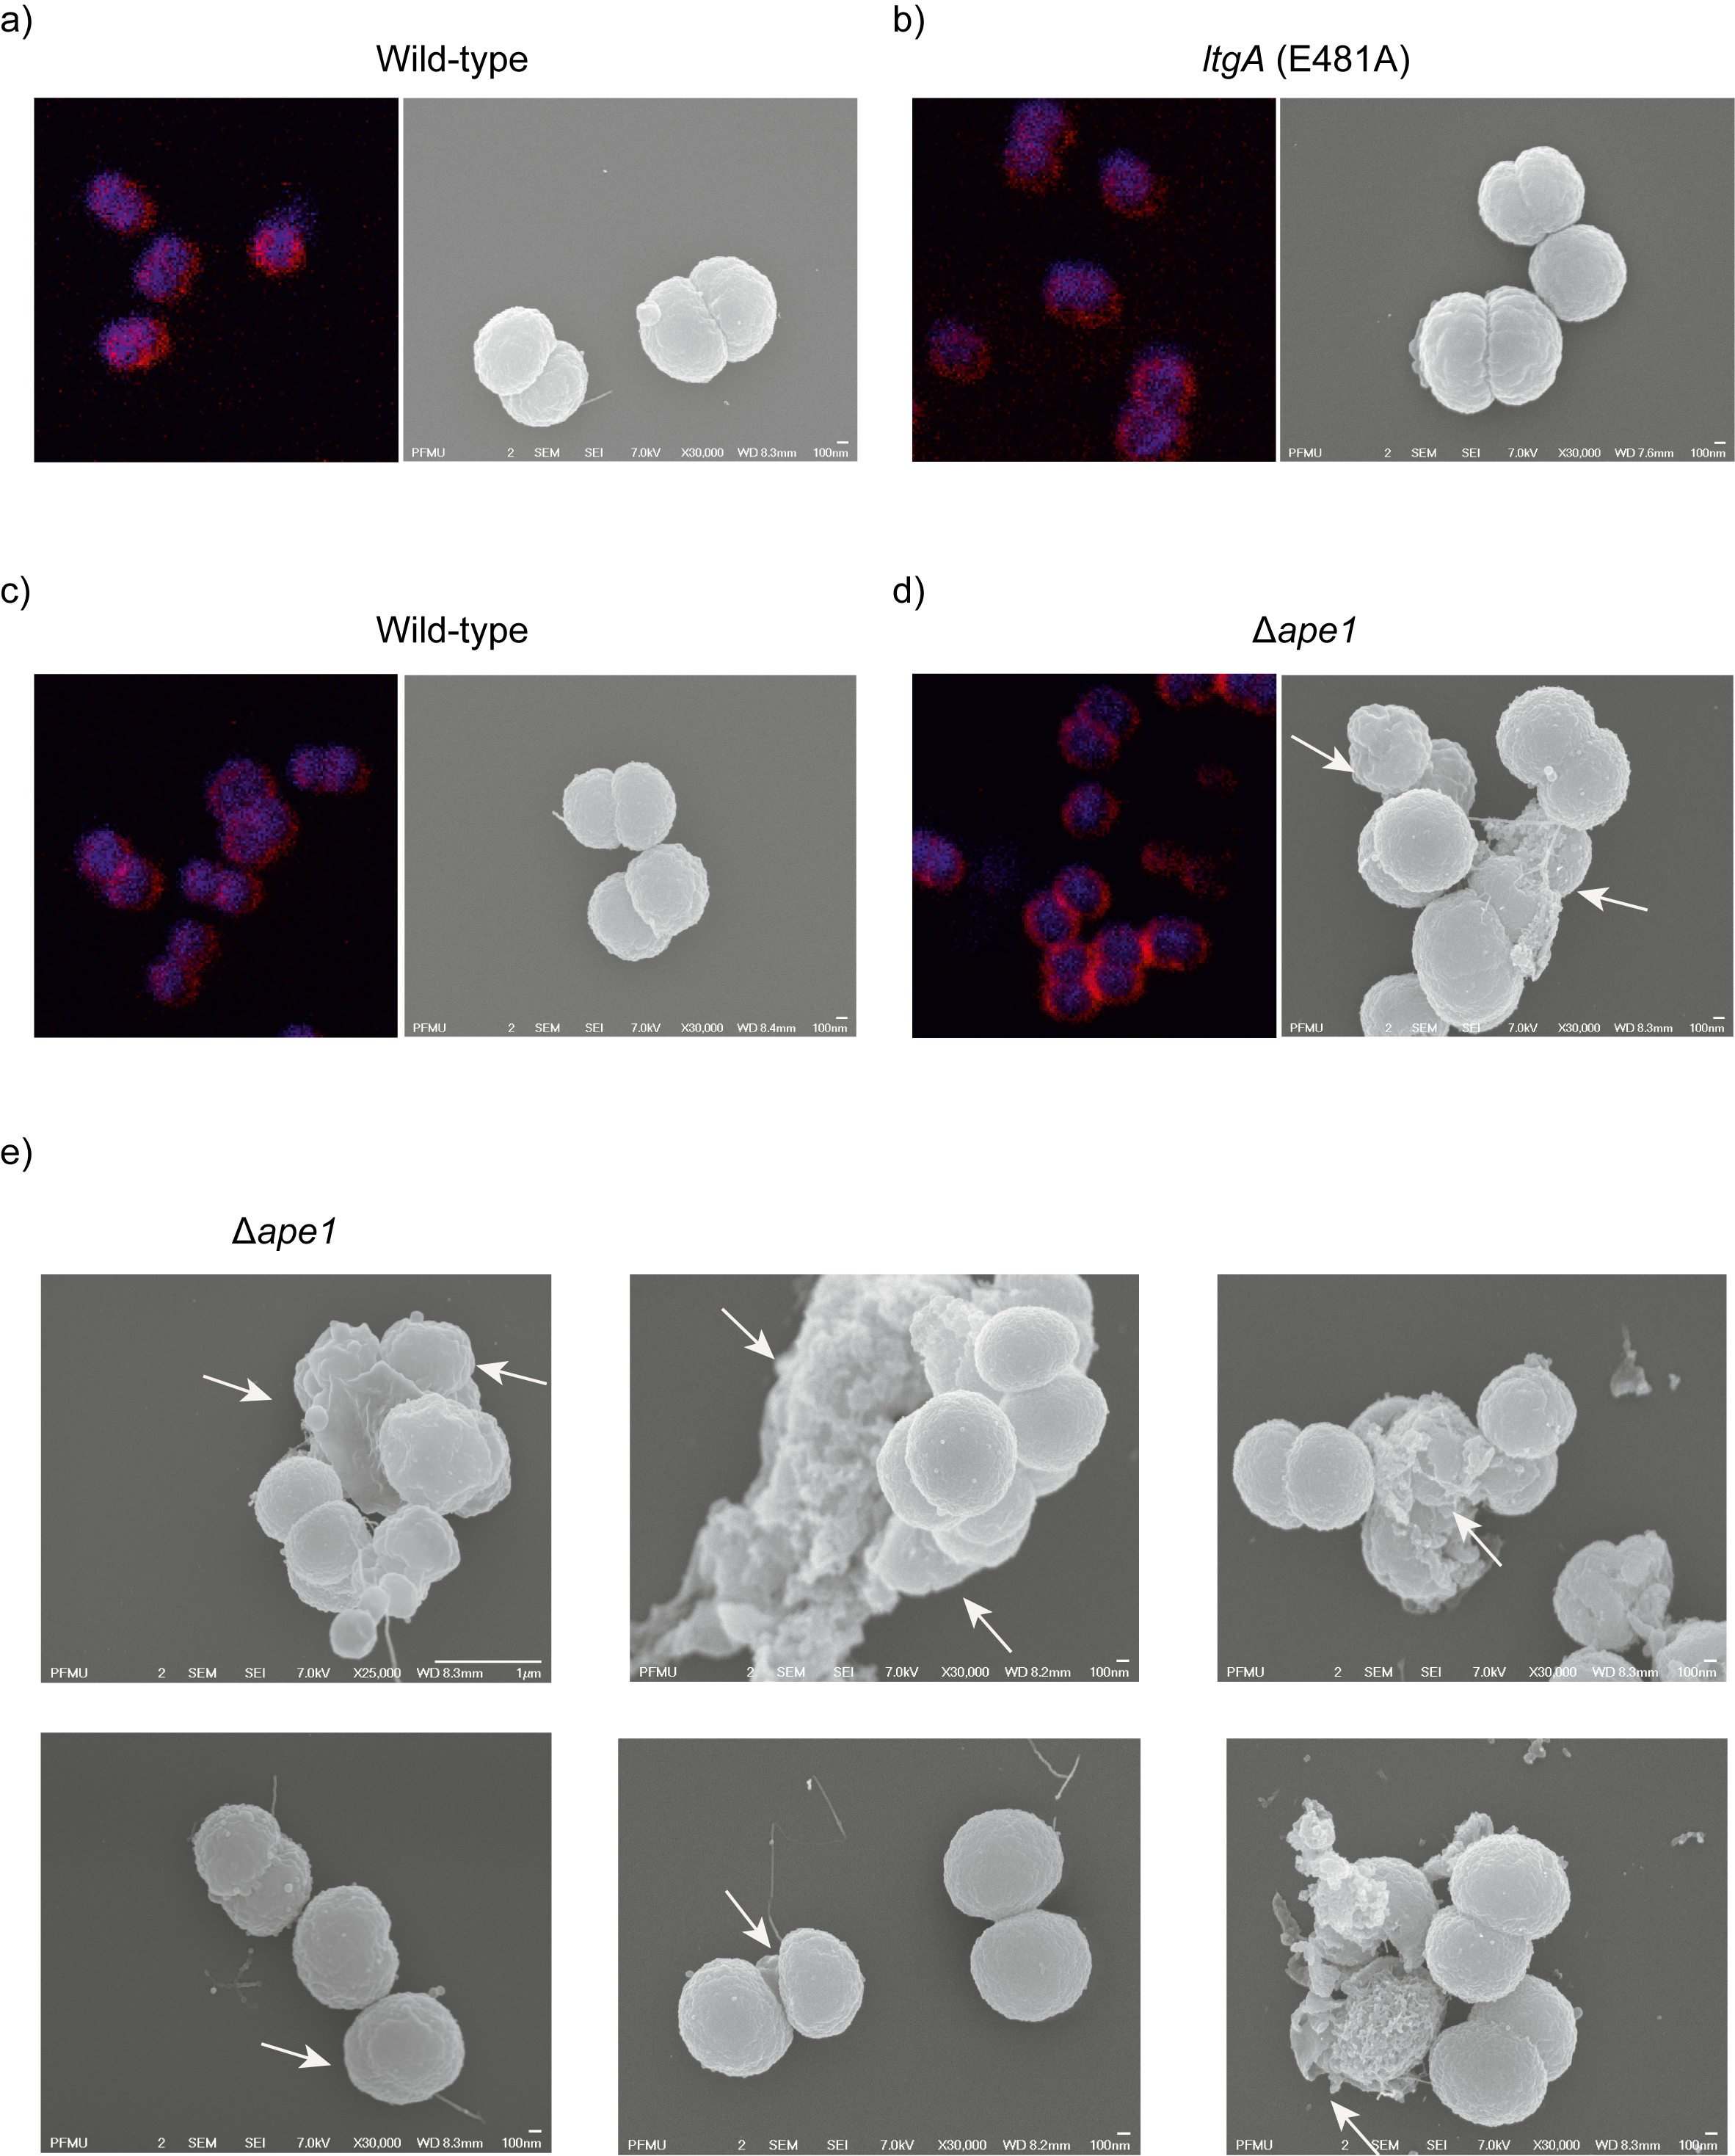

Supplement: supp [file elife_poa_e51247_Figure_3_figure_supplement_2.docx]

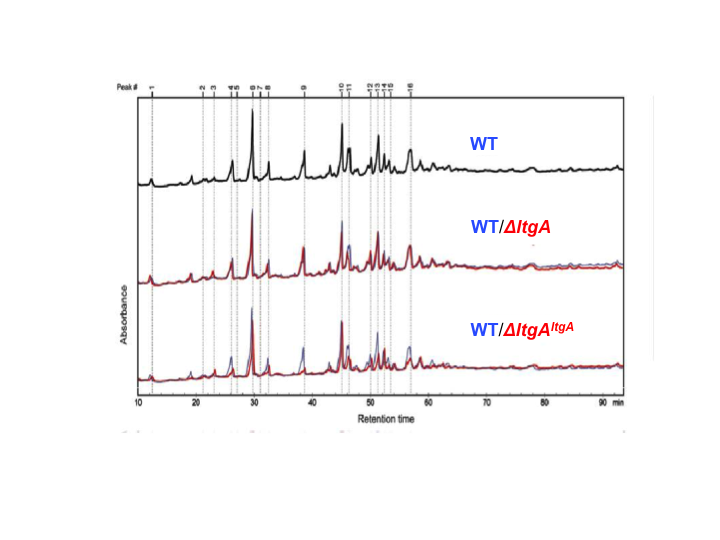

Supplement: supp [file elife_poa_e51247_Figure_4_figure_supplement_1.docx]

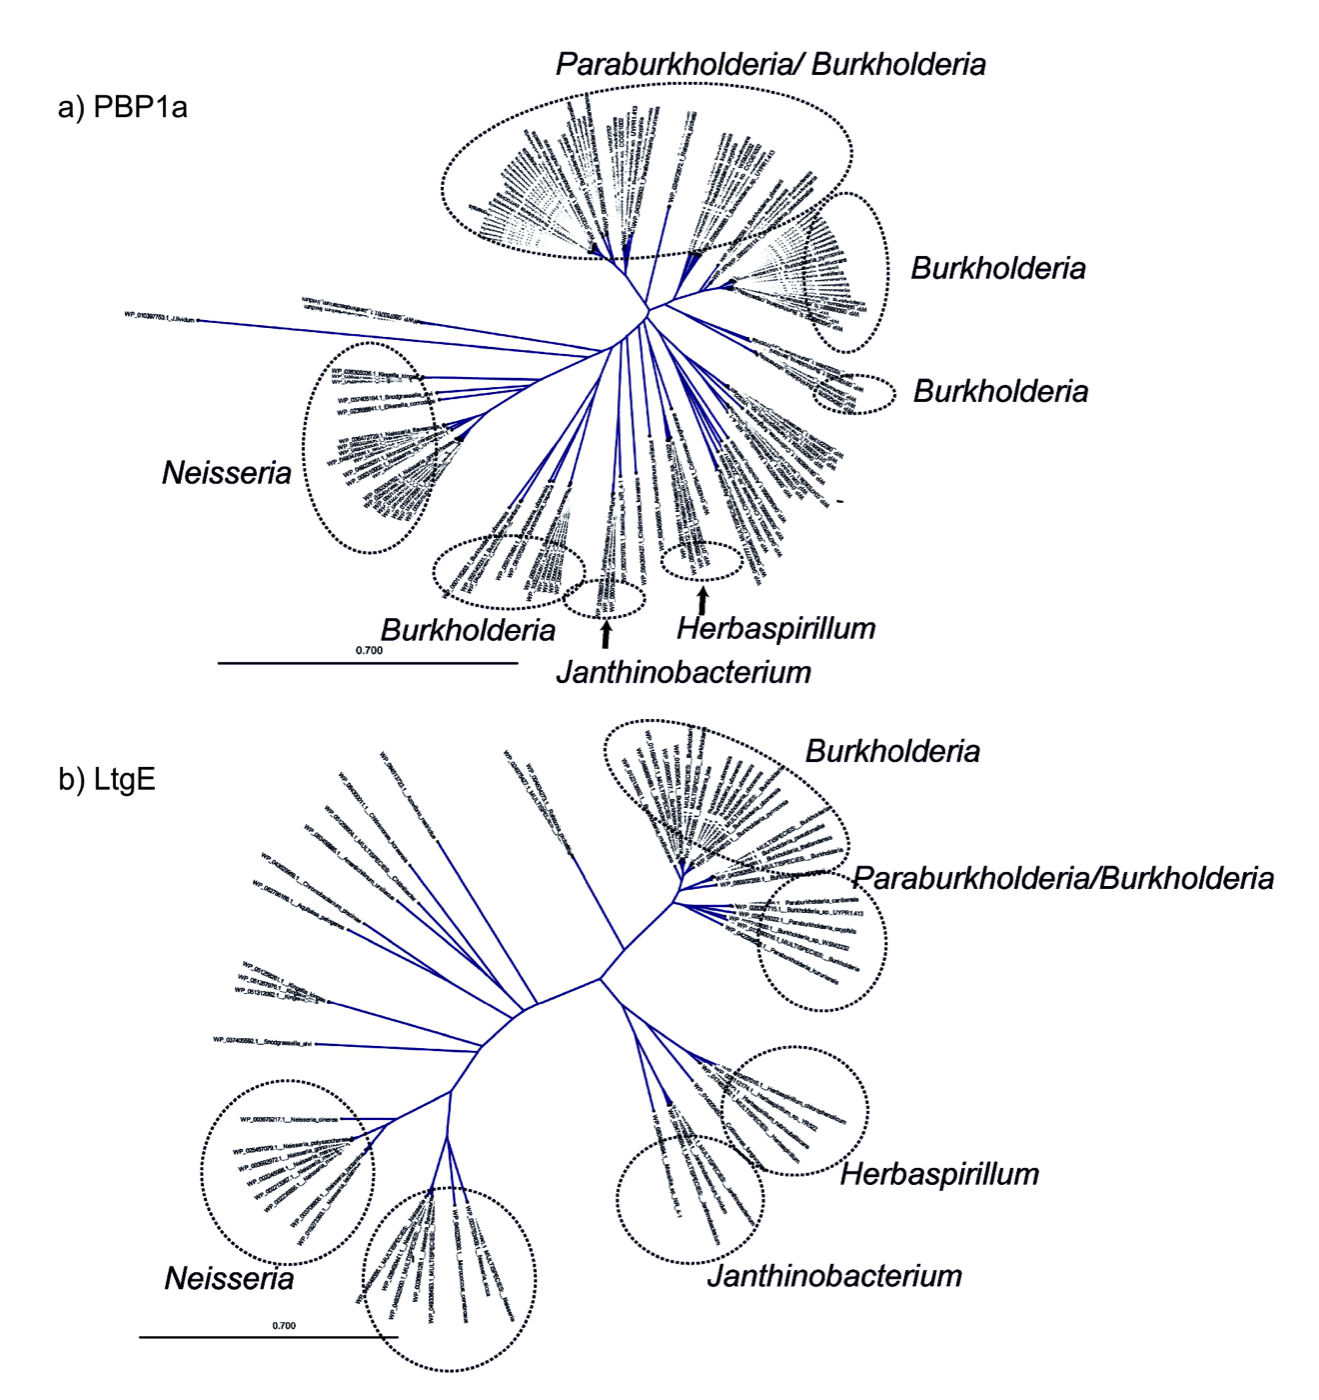

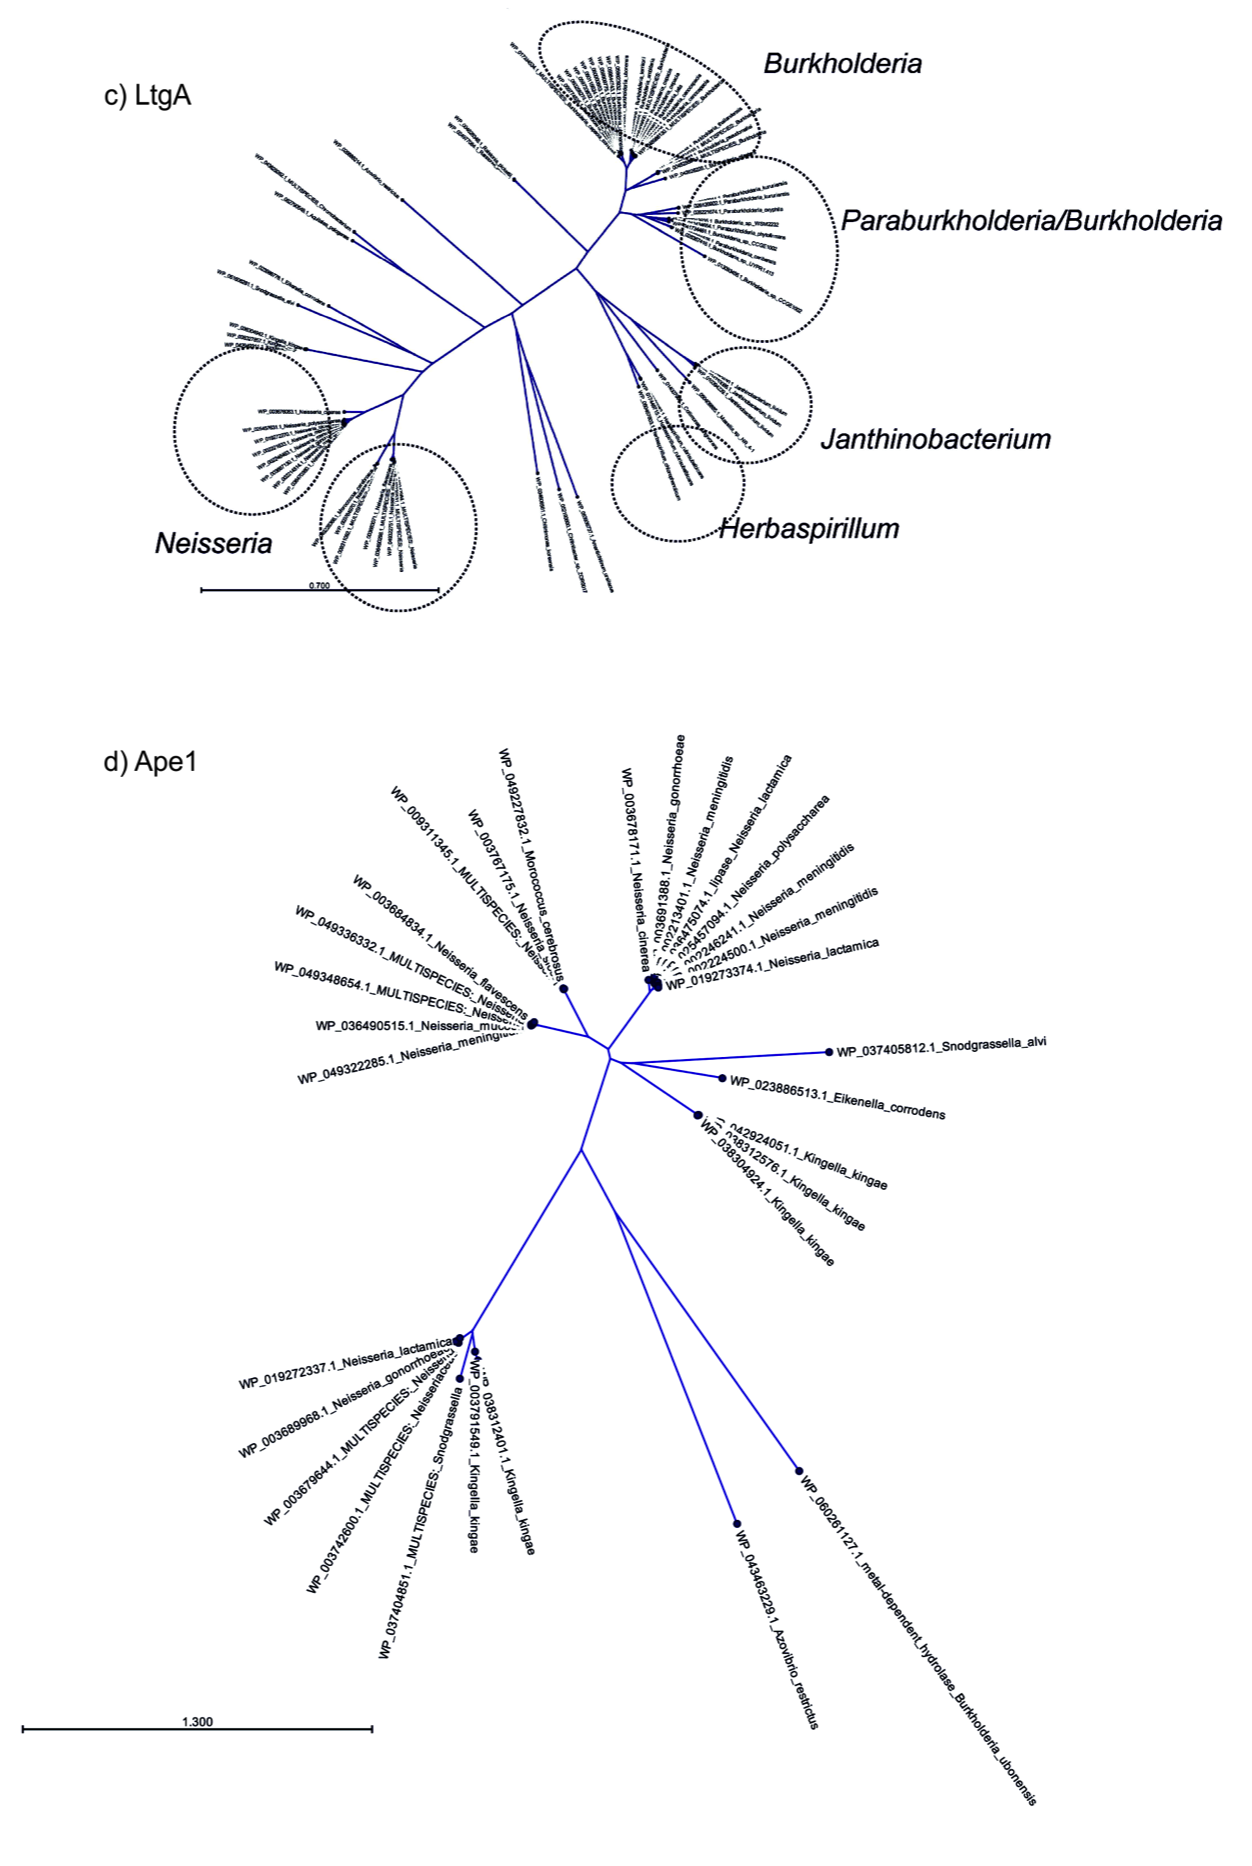

Supplement: supp [file elife_poa_e51247_Figure_5_figure_supplement_1.docx]
